# Supplementary material for: A Novel Network Integrating a miRNA-203/SNAI1 Feedback Loop which Regulates Epithelial to Mesenchymal Transition
Source: PLoS One. 2012 Apr 13;7(4):e35440. doi: 10.1371/journal.pone.0035440 (PMC3325969; doi:10.1371/journal.pone.0035440)
Supplement: Table S2 — Large-scale analysis of miRNA expressions combining our SNAI1-induced EMT study with epithelial/mesenchymal signatures. The large-scale analysis combines our microarray analysis results and signatures from four published miRNA microarray analyses of the NCI60 cancer cell line panel. For each analysis, a table provides a list of miRNAs with corresponding expression levels (UP or DOWN), selected with a p-value threshold of 0.01 (from a t-test using the Park et al. classification). This file includes a Venn diagram of the different analyses. (XLS) [file pone.0035440.s006.xls]

## Sheet: Meta-Analysis
miRNA_id	MCF7-SNAI1 EMT cell model	Park et al.	Liu et al.	Blower et al.	Sokilde et al.	expression	DOWN	UP	Incoherents
hsa-miR-203	DOWN	DOWN	DOWN	DOWN	DOWN	DOWN	5	0			MCF7-SNAI1 EMT cell model (GEO accession: GSE35074)
hsa-miR-200c	DOWN	DOWN	DOWN	DOWN	DOWN	DOWN	5	0
hsa-miR-200b	DOWN	DOWN	DOWN	DOWN	DOWN	DOWN	5	0
hsa-miR-200a	DOWN	DOWN	DOWN		DOWN	DOWN	4	0
hsa-miR-141		DOWN	DOWN	DOWN	DOWN	DOWN	4	0
hsa-mir-7			DOWN	DOWN	DOWN	DOWN	3	0
hsa-miR-429	DOWN		DOWN		DOWN	DOWN	3	0
hsa-miR-375		DOWN	DOWN	DOWN		DOWN	3	0
hsa-mir-215			DOWN	DOWN	DOWN	DOWN	3	0
hsa-mir-205			DOWN	DOWN	DOWN	DOWN	3	0
hsa-mir-194			DOWN	DOWN	DOWN	DOWN	3	0
hsa-mir-192			DOWN	DOWN	DOWN	DOWN	3	0
hsa-miR-625	DOWN				DOWN	DOWN	2	0
hsa-miR-425	DOWN				DOWN	DOWN	2	0
hsa-miR-20b	DOWN				DOWN	DOWN	2	0
hsa-miR-20a	DOWN				DOWN	DOWN	2	0
hsa-miR-17	DOWN				DOWN	DOWN	2	0
hsa-mir-148b			DOWN		DOWN	DOWN	2	0
hsa-mir-107			DOWN		DOWN	DOWN	2	0
hsa-miR-106b	DOWN				DOWN	DOWN	2	0
hsa-miR-106a	DOWN				DOWN	DOWN	2	0
hsa-miR-96					DOWN	DOWN	1	0
hsa-miR-936	DOWN					DOWN	1	0
hsa-miR-93					DOWN	DOWN	1	0
hsa-miR-92a	DOWN					DOWN	1	0
hsa-miR-923	DOWN					DOWN	1	0
hsa-miR-770-5p					DOWN	DOWN	1	0
hsa-miR-769-5p					DOWN	DOWN	1	0
hsa-miR-744					DOWN	DOWN	1	0
hsa-miR-7-1s					DOWN	DOWN	1	0
hsa-miR-675s					DOWN	DOWN	1	0
hsa-miR-629s					DOWN	DOWN	1	0
hsa-miR-624					DOWN	DOWN	1	0
hsa-miR-590-5p					DOWN	DOWN	1	0
hsa-miR-590-3p					DOWN	DOWN	1	0
hsa-miR-577					DOWN	DOWN	1	0
hsa-miR-570					DOWN	DOWN	1	0
hsa-mir-527				DOWN		DOWN	1	0
hsa-mir-526a				DOWN		DOWN	1	0
hsa-miR-525-5p					DOWN	DOWN	1	0
hsa-mir-523				DOWN		DOWN	1	0
hsa-mir-520h				DOWN		DOWN	1	0
hsa-miR-520g				DOWN		DOWN	1	0
hsa-mir-520f				DOWN		DOWN	1	0
hsa-mir-520d				DOWN		DOWN	1	0
hsa-miR-519e					DOWN	DOWN	1	0
hsa-miR-518e				DOWN		DOWN	1	0
hsa-mir-518d				DOWN		DOWN	1	0
hsa-mir-518c				DOWN		DOWN	1	0
hsa-mir-516				DOWN		DOWN	1	0
hsa-mir-514				DOWN		DOWN	1	0
hsa-mir-512				DOWN		DOWN	1	0
hsa-mir-511				DOWN		DOWN	1	0
hsa-mir-508				DOWN		DOWN	1	0
hsa-mir-507				DOWN		DOWN	1	0
hsa-mir-506				DOWN		DOWN	1	0
hsa-mir-501				DOWN		DOWN	1	0
hsa-mir-491				DOWN		DOWN	1	0
hsa-mir-490				DOWN		DOWN	1	0
hsa-mir-488				DOWN		DOWN	1	0
hsa-miR-454					DOWN	DOWN	1	0
hsa-miR-449a					DOWN	DOWN	1	0
hsa-mir-449				DOWN		DOWN	1	0
hsa-miR-421					DOWN	DOWN	1	0
hsa-miR-380					DOWN	DOWN	1	0
hsa-miR-374as					DOWN	DOWN	1	0
hsa-miR-374a					DOWN	DOWN	1	0
hsa-mir-374				DOWN		DOWN	1	0
hsa-miR-365	DOWN					DOWN	1	0
hsa-mir-34c				DOWN		DOWN	1	0
hsa-miR-34a					DOWN	DOWN	1	0
hsa-miR-342-3p	DOWN					DOWN	1	0
hsa-mir-340				DOWN		DOWN	1	0
hsa-miR-33b					DOWN	DOWN	1	0
hsa-miR-338-3p					DOWN	DOWN	1	0
hsa-mir-338				DOWN		DOWN	1	0
hsa-miR-331-5p					DOWN	DOWN	1	0
hsa-miR-331-3p					DOWN	DOWN	1	0
hsa-mir-330				DOWN		DOWN	1	0
hsa-miR-32					DOWN	DOWN	1	0
hsa-miR-30e					DOWN	DOWN	1	0
hsa-miR-30a	DOWN					DOWN	1	0
hsa-miR-301b					DOWN	DOWN	1	0
hsa-miR-301a					DOWN	DOWN	1	0
hsa-miR-29c					DOWN	DOWN	1	0
hsa-miR-29a	DOWN					DOWN	1	0
hsa-miR-27b	DOWN					DOWN	1	0
hsa-miR-27a	DOWN					DOWN	1	0
hsa-miR-21	DOWN					DOWN	1	0
hsa-mir-202				DOWN		DOWN	1	0
hsa-miR-200cs					DOWN	DOWN	1	0
hsa-miR-200bs					DOWN	DOWN	1	0
hsa-miR-200as					DOWN	DOWN	1	0
hsa-miR-19a					DOWN	DOWN	1	0
hsa-miR-192s					DOWN	DOWN	1	0
hsa-miR-18b					DOWN	DOWN	1	0
hsa-miR-18a					DOWN	DOWN	1	0
hsa-miR-186					DOWN	DOWN	1	0
hsa-miR-185	DOWN					DOWN	1	0
hsa-miR-183	DOWN					DOWN	1	0
hsa-miR-182	DOWN					DOWN	1	0
hsa-miR-181b	DOWN					DOWN	1	0
hsa-miR-17s					DOWN	DOWN	1	0
hsa-miR-16-1s					DOWN	DOWN	1	0
hsa-miR-148a					DOWN	DOWN	1	0
hsa-miR-141s					DOWN	DOWN	1	0
hsa-miR-135b					DOWN	DOWN	1	0
hsa-miR-1307					DOWN	DOWN	1	0
hsa-miR-1280	DOWN					DOWN	1	0
hsa-miR-1180					DOWN	DOWN	1	0
hsa-miR-106a,hsa-miR-17					DOWN	DOWN	1	0
hsa-miR-103					DOWN	DOWN	1	0
hsa-mir-101-2				DOWN		DOWN	1	0
hsa-miR-101					DOWN	DOWN	1	0
hsa-let-7g					DOWN	DOWN	1	0
hsa-let-7f					DOWN	DOWN	1	0
hsa-miR-877	DOWN				UP	INVARIANT	1	1	X
hsa-miR-498	UP			DOWN		INVARIANT	1	1	X
hsa-miR-181a	DOWN		UP			INVARIANT	1	1	X
hsa-miR-15a	UP				DOWN	INVARIANT	1	1	X
hsa-mir-100			UP	DOWN		INVARIANT	1	1	X
hsa-miR-939			UP			UP	0	1
hsa-miR-768-5p	UP					UP	0	1
hsa-miR-768-3p	UP					UP	0	1
hsa-miR-765					UP	UP	0	1
hsa-miR-675					UP	UP	0	1
hsa-miR-665					UP	UP	0	1
hsa-miR-663	UP					UP	0	1
hsa-miR-630					UP	UP	0	1
hsa-miR-583					UP	UP	0	1
hsa-miR-574-5p	UP					UP	0	1
hsa-miR-574-3p	UP					UP	0	1
hsa-miR-572					UP	UP	0	1
hsa-mir-542			UP			UP	0	1
hsa-miR-505s	UP					UP	0	1
hsa-miR-455-3p	UP					UP	0	1
hsa-mir-455			UP			UP	0	1
hsa-mir-432			UP			UP	0	1
hsa-miR-424s	UP					UP	0	1
hsa-mir-382				UP		UP	0	1
hsa-miR-374b	UP					UP	0	1
hsa-miR-361-5p	UP					UP	0	1
hsa-miR-321		UP				UP	0	1
hsa-miR-30c	UP					UP	0	1
hsa-miR-30bs					UP	UP	0	1
hsa-miR-299-3p					UP	UP	0	1
hsa-miR-299		UP				UP	0	1
hsa-miR-28-5p	UP					UP	0	1
hsa-miR-2276					UP	UP	0	1
hsa-miR-223		UP				UP	0	1
hsa-miR-222	UP					UP	0	1
hsa-miR-221	UP					UP	0	1
hsa-miR-2110					UP	UP	0	1
hsa-miR-211		UP				UP	0	1
hsa-miR-204		UP				UP	0	1
hsa-miR-198					UP	UP	0	1
hsa-miR-197	UP					UP	0	1
hsa-miR-195	UP					UP	0	1
hsa-miR-1908					UP	UP	0	1
hsa-miR-152	UP					UP	0	1
hsa-miR-151-3p	UP					UP	0	1
hsa-miR-150s	UP					UP	0	1
hsa-miR-149s	UP					UP	0	1
hsa-mir-146b				UP		UP	0	1
hsa-mir-146a				UP		UP	0	1
hsa-miR-146		UP				UP	0	1
hsa-mir-138				UP		UP	0	1
hsa-miR-137		UP				UP	0	1
hsa-miR-134		UP				UP	0	1
hsa-miR-132	UP					UP	0	1
hsa-miR-128	UP					UP	0	1
hsa-miR-127		UP				UP	0	1
hsa-mir-125b			UP			UP	0	1
hsa-miR-125a-5p	UP					UP	0	1
hsa-miR-1231	UP					UP	0	1
hsa-miR-105		UP				UP	0	1
hsa-mir-101-1				UP		UP	0	1
hsa-let-7i	UP					UP	0	1
hsa-let-7ds	UP					UP	0	1
hsa-miR-638	UP				UP	UP	0	2
hsa-miR-424	UP		UP			UP	0	2
hsa-miR-503	UP		UP		UP	UP	0	3
hsa-miR-22	UP	UP	UP			UP	0	3
hsa-miR-140		UP	UP	UP		UP	0	3
hsa-miR-155		UP	UP	UP	UP	UP	0	4

## Sheet: Methods
Methods
Data from the NCI60 panel were analyzed using the same statistical analysis (t-test) and classification as described in Park et al, 2008. Differentially expressed miRNAs were filtered using a p-value threshold of 0.01. Expression levels (UP or DOWN) correspond to the sign of the difference between the average of expression values in epithelial and mesenchymal cell types.

## Sheet: Venn Diagram
hsa-miR-200b	LCSciences
hsa-miR-203	LCSciences																	with "LCSciences" corresponding to Vetter et al.
hsa-miR-200c	LCSciences
hsa-miR-200a	LCSciences
hsa-miR-429	LCSciences
hsa-miR-106a	LCSciences
hsa-miR-106b	LCSciences
hsa-miR-17	LCSciences
hsa-miR-20a	LCSciences
hsa-miR-20b	LCSciences
hsa-miR-425	LCSciences
hsa-miR-625	LCSciences
hsa-miR-1280	LCSciences
hsa-miR-181b	LCSciences
hsa-miR-182	LCSciences
hsa-miR-183	LCSciences
hsa-miR-185	LCSciences
hsa-miR-27a	LCSciences
hsa-miR-27b	LCSciences
hsa-miR-29a	LCSciences
hsa-miR-30a	LCSciences
hsa-miR-342-3p	LCSciences
hsa-miR-365	LCSciences
hsa-miR-923	LCSciences
hsa-miR-92a	LCSciences
hsa-miR-936	LCSciences
hsa-miR-21	LCSciences
hsa-miR-877	LCSciences
hsa-miR-181a	LCSciences
hsa-miR-498	LCSciences
hsa-miR-15a	LCSciences
hsa-miR-222	LCSciences
hsa-miR-30c	LCSciences
hsa-let-7ds	LCSciences
hsa-let-7i	LCSciences
hsa-miR-1231	LCSciences
hsa-miR-125a-5p	LCSciences
hsa-miR-128	LCSciences
hsa-miR-132	LCSciences
hsa-miR-149s	LCSciences
hsa-miR-150s	LCSciences
hsa-miR-151-3p	LCSciences
hsa-miR-152	LCSciences
hsa-miR-195	LCSciences
hsa-miR-197	LCSciences
hsa-miR-221	LCSciences
hsa-miR-28-5p	LCSciences
hsa-miR-361-5p	LCSciences
hsa-miR-374b	LCSciences
hsa-miR-455-3p	LCSciences
hsa-miR-505s	LCSciences
hsa-miR-574-3p	LCSciences
hsa-miR-574-5p	LCSciences
hsa-miR-663	LCSciences
hsa-miR-768-3p	LCSciences
hsa-miR-768-5p	LCSciences
hsa-miR-424s	LCSciences
hsa-miR-638	LCSciences
hsa-miR-424	LCSciences
hsa-miR-503	LCSciences
hsa-miR-22	LCSciences
hsa-miR-200b	Park
hsa-miR-203	Park
hsa-miR-200c	Park
hsa-miR-200a	Park
hsa-miR-141	Park
hsa-miR-375	Park
hsa-miR-105	Park
hsa-miR-127	Park
hsa-miR-137	Park
hsa-miR-146	Park
hsa-miR-204	Park
hsa-miR-211	Park
hsa-miR-223	Park
hsa-miR-299	Park
hsa-miR-321	Park
hsa-miR-134	Park
hsa-miR-140	Park
hsa-miR-22	Park
hsa-miR-155	Park
hsa-miR-200b	Liu
hsa-miR-203	Liu
hsa-miR-200c	Liu
hsa-miR-200a	Liu
hsa-miR-141	Liu
hsa-miR-429	Liu
hsa-mir-192	Liu
hsa-mir-194	Liu
hsa-mir-205	Liu
hsa-miR-375	Liu
hsa-mir-215	Liu
hsa-mir-7	Liu
hsa-mir-107	Liu
hsa-mir-148b	Liu
hsa-miR-181a	Liu
hsa-mir-100	Liu
hsa-mir-125b	Liu
hsa-mir-432	Liu
hsa-mir-455	Liu
hsa-mir-542	Liu
hsa-miR-939	Liu
hsa-miR-424	Liu
hsa-miR-503	Liu
hsa-miR-140	Liu
hsa-miR-22	Liu
hsa-miR-155	Liu
hsa-miR-200b	Blower
hsa-miR-203	Blower
hsa-miR-200c	Blower
hsa-miR-141	Blower
hsa-mir-192	Blower
hsa-mir-194	Blower
hsa-mir-205	Blower
hsa-miR-375	Blower
hsa-mir-215	Blower
hsa-mir-7	Blower
hsa-mir-101-2	Blower
hsa-mir-202	Blower
hsa-mir-330	Blower
hsa-mir-338	Blower
hsa-mir-340	Blower
hsa-mir-34c	Blower
hsa-mir-374	Blower
hsa-mir-449	Blower
hsa-mir-488	Blower
hsa-mir-490	Blower
hsa-mir-491	Blower
hsa-mir-501	Blower
hsa-mir-506	Blower
hsa-mir-507	Blower
hsa-mir-508	Blower
hsa-mir-511	Blower
hsa-mir-512	Blower
hsa-mir-514	Blower
hsa-mir-516	Blower
hsa-mir-518c	Blower
hsa-mir-518d	Blower
hsa-mir-520d	Blower
hsa-mir-520f	Blower
hsa-mir-520h	Blower
hsa-mir-523	Blower
hsa-mir-526a	Blower
hsa-mir-527	Blower
hsa-miR-518e	Blower
hsa-miR-520g	Blower
hsa-miR-498	Blower
hsa-mir-100	Blower
hsa-mir-101-1	Blower
hsa-mir-138	Blower
hsa-mir-146a	Blower
hsa-mir-146b	Blower
hsa-mir-382	Blower
hsa-miR-140	Blower
hsa-miR-155	Blower
hsa-miR-200b	Sokilde
hsa-miR-203	Sokilde
hsa-miR-200c	Sokilde
hsa-miR-200a	Sokilde
hsa-miR-141	Sokilde
hsa-miR-429	Sokilde
hsa-mir-192	Sokilde
hsa-mir-194	Sokilde
hsa-mir-205	Sokilde
hsa-mir-215	Sokilde
hsa-mir-7	Sokilde
hsa-miR-106a	Sokilde
hsa-miR-106b	Sokilde
hsa-miR-17	Sokilde
hsa-miR-20a	Sokilde
hsa-miR-20b	Sokilde
hsa-miR-425	Sokilde
hsa-miR-625	Sokilde
hsa-mir-107	Sokilde
hsa-mir-148b	Sokilde
hsa-miR-29c	Sokilde
hsa-miR-30e	Sokilde
hsa-miR-93	Sokilde
hsa-let-7f	Sokilde
hsa-miR-590-3p	Sokilde
hsa-miR-301a	Sokilde
hsa-miR-32	Sokilde
hsa-miR-301b	Sokilde
hsa-miR-590-5p	Sokilde
hsa-miR-7-1s	Sokilde
hsa-miR-33b	Sokilde
hsa-miR-577	Sokilde
hsa-miR-101	Sokilde
hsa-miR-200as	Sokilde
hsa-miR-331-5p	Sokilde
hsa-miR-96	Sokilde
hsa-miR-1180	Sokilde
hsa-miR-18a	Sokilde
hsa-miR-454	Sokilde
hsa-miR-18b	Sokilde
hsa-let-7g	Sokilde
hsa-miR-135b	Sokilde
hsa-miR-570	Sokilde
hsa-miR-103	Sokilde
hsa-miR-374as	Sokilde
hsa-miR-200cs	Sokilde
hsa-miR-331-3p	Sokilde
hsa-miR-675s	Sokilde
hsa-miR-192s	Sokilde
hsa-miR-17s	Sokilde
hsa-miR-624	Sokilde
hsa-miR-769-5p	Sokilde
hsa-miR-374a	Sokilde
hsa-miR-1307	Sokilde
hsa-miR-421	Sokilde
hsa-miR-106a,hsa-miR-17	Sokilde
hsa-miR-744	Sokilde
hsa-miR-519e	Sokilde
hsa-miR-200bs	Sokilde
hsa-miR-338-3p	Sokilde
hsa-miR-770-5p	Sokilde
hsa-miR-34a	Sokilde
hsa-miR-141s	Sokilde
hsa-miR-186	Sokilde
hsa-miR-19a	Sokilde
hsa-miR-16-1s	Sokilde
hsa-miR-525-5p	Sokilde
hsa-miR-629s	Sokilde
hsa-miR-148a	Sokilde
hsa-miR-380	Sokilde
hsa-miR-449a	Sokilde
hsa-miR-877	Sokilde
hsa-miR-15a	Sokilde
hsa-miR-675	Sokilde
hsa-miR-765	Sokilde
hsa-miR-30bs	Sokilde
hsa-miR-2110	Sokilde
hsa-miR-2276	Sokilde
hsa-miR-1908	Sokilde
hsa-miR-198	Sokilde
hsa-miR-299-3p	Sokilde
hsa-miR-572	Sokilde
hsa-miR-630	Sokilde
hsa-miR-583	Sokilde
hsa-miR-665	Sokilde
hsa-miR-638	Sokilde
hsa-miR-503	Sokilde
hsa-miR-155	Sokilde

## Sheet: MCF7-SNAI1 EMT cell model
identifier	miRNA_id	expression
hsa-let-7d*	hsa-let-7ds	UP
hsa-let-7i	hsa-let-7i	UP
hsa-miR-106a	hsa-miR-106a	DOWN
hsa-miR-106b	hsa-miR-106b	DOWN
hsa-miR-1231	hsa-miR-1231	UP
hsa-miR-125a-5p	hsa-miR-125a-5p	UP
hsa-miR-128	hsa-miR-128	UP
hsa-miR-1280	hsa-miR-1280	DOWN
hsa-miR-132	hsa-miR-132	UP
hsa-miR-149*	hsa-miR-149s	UP
hsa-miR-150*	hsa-miR-150s	UP
hsa-miR-151-3p	hsa-miR-151-3p	UP
hsa-miR-152	hsa-miR-152	UP
hsa-miR-15a	hsa-miR-15a	UP
hsa-miR-17	hsa-miR-17	DOWN
hsa-miR-181a	hsa-miR-181a	DOWN
hsa-miR-181b	hsa-miR-181b	DOWN
hsa-miR-182	hsa-miR-182	DOWN
hsa-miR-183	hsa-miR-183	DOWN
hsa-miR-185	hsa-miR-185	DOWN
hsa-miR-195	hsa-miR-195	UP
hsa-miR-197	hsa-miR-197	UP
hsa-miR-200a	hsa-miR-200a	DOWN
hsa-miR-200b	hsa-miR-200b	DOWN
hsa-miR-200c	hsa-miR-200c	DOWN
hsa-miR-203	hsa-miR-203	DOWN
hsa-miR-20a	hsa-miR-20a	DOWN
hsa-miR-20b	hsa-miR-20b	DOWN
hsa-miR-21	hsa-miR-21	DOWN
hsa-miR-22	hsa-miR-22	UP
hsa-miR-221	hsa-miR-221	UP
hsa-miR-222	hsa-miR-222	UP
hsa-miR-27a	hsa-miR-27a	DOWN
hsa-miR-27b	hsa-miR-27b	DOWN
hsa-miR-28-5p	hsa-miR-28-5p	UP
hsa-miR-29a	hsa-miR-29a	DOWN
hsa-miR-30a	hsa-miR-30a	DOWN
hsa-miR-30c	hsa-miR-30c	UP
hsa-miR-342-3p	hsa-miR-342-3p	DOWN
hsa-miR-361-5p	hsa-miR-361-5p	UP
hsa-miR-365	hsa-miR-365	DOWN
hsa-miR-374b	hsa-miR-374b	UP
hsa-miR-424	hsa-miR-424	UP
hsa-miR-424*	hsa-miR-424s	UP
hsa-miR-425	hsa-miR-425	DOWN
hsa-miR-429	hsa-miR-429	DOWN
hsa-miR-455-3p	hsa-miR-455-3p	UP
hsa-miR-498	hsa-miR-498	UP
hsa-miR-503	hsa-miR-503	UP
hsa-miR-505*	hsa-miR-505s	UP
hsa-miR-574-3p	hsa-miR-574-3p	UP
hsa-miR-574-5p	hsa-miR-574-5p	UP
hsa-miR-625	hsa-miR-625	DOWN
hsa-miR-638	hsa-miR-638	UP
hsa-miR-663	hsa-miR-663	UP
hsa-miR-768-3p	hsa-miR-768-3p	UP
hsa-miR-768-5p	hsa-miR-768-5p	UP
hsa-miR-877	hsa-miR-877	DOWN
hsa-miR-923	hsa-miR-923	DOWN
hsa-miR-92a	hsa-miR-92a	DOWN
hsa-miR-936	hsa-miR-936	DOWN

## Sheet: Park et al.
identifier	miRNA_id	expression
hsa-miR-105	hsa-miR-105	UP
hsa-miR-127	hsa-miR-127	UP
hsa-miR-134	hsa-miR-134	UP
hsa-miR-137	hsa-miR-137	UP
hsa-miR-140	hsa-miR-140	UP
hsa-miR-141	hsa-miR-141	DOWN
hsa-miR-146	hsa-miR-146	UP
hsa-miR-155	hsa-miR-155	UP
hsa-miR-200a	hsa-miR-200a	DOWN
hsa-miR-200b	hsa-miR-200b	DOWN
hsa-miR-200c	hsa-miR-200c	DOWN
hsa-miR-203	hsa-miR-203	DOWN
hsa-miR-204	hsa-miR-204	UP
hsa-miR-211	hsa-miR-211	UP
hsa-miR-22	hsa-miR-22	UP
hsa-miR-223	hsa-miR-223	UP
hsa-miR-299	hsa-miR-299	UP
hsa-miR-321	hsa-miR-321	UP
hsa-miR-375	hsa-miR-375	DOWN

## Sheet: Liu et al.
identifier	miRNA_id	expression
hsa-mir-100	hsa-mir-100	UP
hsa-mir-107	hsa-mir-107	DOWN
hsa-mir-125b	hsa-mir-125b	UP
hsa-mir-140	hsa-mir-140	UP
hsa-mir-141	hsa-mir-141	DOWN
hsa-mir-148b	hsa-mir-148b	DOWN
hsa-mir-155	hsa-mir-155	UP
hsa-mir-181a	hsa-mir-181a	UP
hsa-mir-192	hsa-mir-192	DOWN
hsa-mir-194	hsa-mir-194	DOWN
hsa-mir-200a	hsa-mir-200a	DOWN
hsa-mir-200b	hsa-mir-200b	DOWN
hsa-mir-200c	hsa-mir-200c	DOWN
hsa-mir-203	hsa-mir-203	DOWN
hsa-mir-205	hsa-mir-205	DOWN
hsa-mir-215	hsa-mir-215	DOWN
hsa-mir-22	hsa-mir-22	UP
hsa-mir-375	hsa-mir-375	DOWN
hsa-mir-424	hsa-mir-424	UP
hsa-mir-429	hsa-mir-429	DOWN
hsa-mir-432	hsa-mir-432	UP
hsa-mir-455	hsa-mir-455	UP
hsa-mir-503	hsa-mir-503	UP
hsa-mir-542	hsa-mir-542	UP
hsa-mir-7	hsa-mir-7	DOWN
hsa-miR-939	hsa-miR-939	UP

## Sheet: Blower et al.
identifier	miRNA_id	expression
hsa-mir-100	hsa-mir-100	DOWN
hsa-mir-101-1	hsa-mir-101-1	UP
hsa-mir-101-2	hsa-mir-101-2	DOWN
hsa-mir-138	hsa-mir-138	UP
hsa-mir-140	hsa-mir-140	UP
hsa-mir-141	hsa-mir-141	DOWN
hsa-mir-146a	hsa-mir-146a	UP
hsa-mir-146b	hsa-mir-146b	UP
hsa-mir-155	hsa-mir-155	UP
hsa-mir-192	hsa-mir-192	DOWN
hsa-mir-194	hsa-mir-194	DOWN
hsa-mir-200b	hsa-mir-200b	DOWN
hsa-mir-200c	hsa-mir-200c	DOWN
hsa-mir-202	hsa-mir-202	DOWN
hsa-mir-203	hsa-mir-203	DOWN
hsa-mir-205	hsa-mir-205	DOWN
hsa-mir-215	hsa-mir-215	DOWN
hsa-mir-330	hsa-mir-330	DOWN
hsa-mir-338	hsa-mir-338	DOWN
hsa-mir-340	hsa-mir-340	DOWN
hsa-mir-34c	hsa-mir-34c	DOWN
hsa-mir-374	hsa-mir-374	DOWN
hsa-mir-375	hsa-mir-375	DOWN
hsa-mir-382	hsa-mir-382	UP
hsa-mir-449	hsa-mir-449	DOWN
hsa-mir-488	hsa-mir-488	DOWN
hsa-mir-490	hsa-mir-490	DOWN
hsa-mir-491	hsa-mir-491	DOWN
hsa-mir-498	hsa-mir-498	DOWN
hsa-mir-501	hsa-mir-501	DOWN
hsa-mir-506	hsa-mir-506	DOWN
hsa-mir-507	hsa-mir-507	DOWN
hsa-mir-508	hsa-mir-508	DOWN
hsa-mir-511	hsa-mir-511	DOWN
hsa-mir-512	hsa-mir-512	DOWN
hsa-mir-514	hsa-mir-514	DOWN
hsa-mir-516	hsa-mir-516	DOWN
hsa-mir-518c	hsa-mir-518c	DOWN
hsa-mir-518d	hsa-mir-518d	DOWN
hsa-mir-518e	hsa-mir-518e	DOWN
hsa-mir-520d	hsa-mir-520d	DOWN
hsa-mir-520f	hsa-mir-520f	DOWN
hsa-mir-520g	hsa-mir-520g	DOWN
hsa-mir-520h	hsa-mir-520h	DOWN
hsa-mir-523	hsa-mir-523	DOWN
hsa-mir-526a	hsa-mir-526a	DOWN
hsa-mir-527	hsa-mir-527	DOWN
hsa-mir-7	hsa-mir-7	DOWN

## Sheet: Sokilde et al.
identifier	miRNA_id	expression
hsa-let-7f	hsa-let-7f	DOWN
hsa-let-7g	hsa-let-7g	DOWN
hsa-miR-101	hsa-miR-101	DOWN
hsa-miR-103	hsa-miR-103	DOWN
hsa-miR-106a	hsa-miR-106a	DOWN
hsa-miR-106a,hsa-miR-17	hsa-miR-106a,hsa-miR-17	DOWN
hsa-miR-106b	hsa-miR-106b	DOWN
hsa-miR-107	hsa-miR-107	DOWN
hsa-miR-1180	hsa-miR-1180	DOWN
hsa-miR-1307	hsa-miR-1307	DOWN
hsa-miR-135b	hsa-miR-135b	DOWN
hsa-miR-141	hsa-miR-141	DOWN
hsa-miR-141s	hsa-miR-141s	DOWN
hsa-miR-148a	hsa-miR-148a	DOWN
hsa-miR-148b	hsa-miR-148b	DOWN
hsa-miR-155	hsa-miR-155	UP
hsa-miR-15a	hsa-miR-15a	DOWN
hsa-miR-16-1s	hsa-miR-16-1s	DOWN
hsa-miR-17	hsa-miR-17	DOWN
hsa-miR-17s	hsa-miR-17s	DOWN
hsa-miR-186	hsa-miR-186	DOWN
hsa-miR-18a	hsa-miR-18a	DOWN
hsa-miR-18b	hsa-miR-18b	DOWN
hsa-miR-1908	hsa-miR-1908	UP
hsa-miR-192	hsa-miR-192	DOWN
hsa-miR-192s	hsa-miR-192s	DOWN
hsa-miR-194	hsa-miR-194	DOWN
hsa-miR-198	hsa-miR-198	UP
hsa-miR-19a	hsa-miR-19a	DOWN
hsa-miR-200a	hsa-miR-200a	DOWN
hsa-miR-200as	hsa-miR-200as	DOWN
hsa-miR-200b	hsa-miR-200b	DOWN
hsa-miR-200bs	hsa-miR-200bs	DOWN
hsa-miR-200c	hsa-miR-200c	DOWN
hsa-miR-200cs	hsa-miR-200cs	DOWN
hsa-miR-203	hsa-miR-203	DOWN
hsa-miR-205	hsa-miR-205	DOWN
hsa-miR-20a	hsa-miR-20a	DOWN
hsa-miR-20b	hsa-miR-20b	DOWN
hsa-miR-2110	hsa-miR-2110	UP
hsa-miR-215	hsa-miR-215	DOWN
hsa-miR-2276	hsa-miR-2276	UP
hsa-miR-299-3p	hsa-miR-299-3p	UP
hsa-miR-29c	hsa-miR-29c	DOWN
hsa-miR-301a	hsa-miR-301a	DOWN
hsa-miR-301b	hsa-miR-301b	DOWN
hsa-miR-30bs	hsa-miR-30bs	UP
hsa-miR-30e	hsa-miR-30e	DOWN
hsa-miR-32	hsa-miR-32	DOWN
hsa-miR-331-3p	hsa-miR-331-3p	DOWN
hsa-miR-331-5p	hsa-miR-331-5p	DOWN
hsa-miR-338-3p	hsa-miR-338-3p	DOWN
hsa-miR-33b	hsa-miR-33b	DOWN
hsa-miR-34a	hsa-miR-34a	DOWN
hsa-miR-374a	hsa-miR-374a	DOWN
hsa-miR-374as	hsa-miR-374as	DOWN
hsa-miR-380	hsa-miR-380	DOWN
hsa-miR-421	hsa-miR-421	DOWN
hsa-miR-425	hsa-miR-425	DOWN
hsa-miR-429	hsa-miR-429	DOWN
hsa-miR-449a	hsa-miR-449a	DOWN
hsa-miR-454	hsa-miR-454	DOWN
hsa-miR-503	hsa-miR-503	UP
hsa-miR-519e	hsa-miR-519e	DOWN
hsa-miR-525-5p	hsa-miR-525-5p	DOWN
hsa-miR-570	hsa-miR-570	DOWN
hsa-miR-572	hsa-miR-572	UP
hsa-miR-577	hsa-miR-577	DOWN
hsa-miR-583	hsa-miR-583	UP
hsa-miR-590-3p	hsa-miR-590-3p	DOWN
hsa-miR-590-5p	hsa-miR-590-5p	DOWN
hsa-miR-624	hsa-miR-624	DOWN
hsa-miR-625	hsa-miR-625	DOWN
hsa-miR-629s	hsa-miR-629s	DOWN
hsa-miR-630	hsa-miR-630	UP
hsa-miR-638	hsa-miR-638	UP
hsa-miR-665	hsa-miR-665	UP
hsa-miR-675	hsa-miR-675	UP
hsa-miR-675s	hsa-miR-675s	DOWN
hsa-miR-7	hsa-miR-7	DOWN
hsa-miR-7-1s	hsa-miR-7-1s	DOWN
hsa-miR-744	hsa-miR-744	DOWN
hsa-miR-765	hsa-miR-765	UP
hsa-miR-769-5p	hsa-miR-769-5p	DOWN
hsa-miR-770-5p	hsa-miR-770-5p	DOWN
hsa-miR-877	hsa-miR-877	UP
hsa-miR-93	hsa-miR-93	DOWN
hsa-miR-96	hsa-miR-96	DOWN

## Sheet: Park et al. analysis
miRNA ID	OVCAR4 (Ov)	NCI-H322M (Lung)	HCC2998 (Colon)	HT29 (Colon)	T47D (Breast)	COLO205 (Colon)	HCT15 (Colon)	MCF7 (Breast)	KM12 (Colon)	OVCAR3 (Ov)	HCT116 (Colon)	K562 (Hema)	HL60TB (Hema)	MOLT4 (Hema)	CCRFCEM (Hema)	SW620 (Colon)	IGROV1 (Ov)	NCI-H522 (Lung)	SR (Hema)	OVCAR5 (Ov)	NCI-H23 (Lung)	CAKI1 (Renal)	NCI-ADR-RES (Breast)	PC3 (Prost)	BT549 (Breast)	ACHN (Renal)	SN12 (Renal)	OVCAR8 (Ov)	HOP62 (Lung)	LOXIMVI (Mel)	SNB19 (CNS)	SF295 (CNS)	MDAMB435 (Breast)	TK10 (Renal)	MDAMB231 (Breast)	U251 (CNS)	SKMEL2 (Mel)	786-0 (Renal)	M14 (Mel)	A498 (Renal)	SF268 (CNS)	SNB75 (CNS)	UACC62 (Mel)	RXF393 (Renal)	SKMEL28 (Mel)	SF539 (CNS)	HS578 (Breast)	HOP92 (Lung)
	E	E	E	E	E	E	E	E	E	E	E	M	M	M	M	M	M	M	M	M	M	M	M	M	M	M	M	M	M	M	M	M	M	M	M	M	M	M	M	M	M	M	M	M	M	M	M	M	t.test
hsa-miR-200c	5.77204	7.89851	7.66818	7.31746	6.32859	7.66018	7.80979	8.13397	6.94482	8.16935	7.92469	-0.544742	-0.584795	3.77408	0.529174	5.41893	4.60771	-1.13018	2.62536	4.64559	-0.352732	1.67273	0.61284	1.8366	0.258119	2.89862	-1.10405	1.40085	3.00452	0.616019	2.57238	-1.99595	-2.72096	2.47859	-0.422282	-0.922195	-1.4918	2.2804	2.80502	2.61773	-2.97264	-2.4995	-0.890634	3.2823	2.90156	-2.74452	-3.80298	-0.35284	4.80371e-19
hsa-miR-141	3.40645	5.17416	5.59803	4.56404	3.19883	4.26028	5.90978	5.01874	2.8223	4.86564	4.70583	-3.55385	-3.29121	1.27063	-3.54461	2.58786	1.17148	-4.81036	-0.336453	0.993938	-4.04118	-4.6212	-3.81486	-3.96428	-3.23081	-4.28297	-4.03743	-3.34302	0.184189	-4.1264	-0.999791	-4.20496	-4.07548	-4.3597	-4.17078	-4.97844	-3.97002	-4.65934	-0.473023	-3.6347	-5.10946	-4.75214	-4.15851	-2.58834	-0.27852	-4.48586	-4.95843	-4.27425	1.01173e-18
hsa-miR-200b	4.0059	5.18972	6.1418	6.62865	5.24802	7.33911	5.38061	4.56422	4.78919	5.85734	4.81081	-3.55385	-3.63211	1.71434	-0.170941	5.28929	3.12152	-4.11196	0.208568	4.30349	-3.18755	2.74098	1.30314	2.47175	-1.91224	4.30585	-2.89688	1.45737	0.516308	2.80435	0.0693168	-4.20496	-3.24126	4.24732	-0.752591	-2.16807	-3.97002	4.23843	2.10887	3.01838	-5.10946	-4.74276	-1.00959	5.05208	0.315546	-4.48586	-3.58793	1.6781	4.53784e-12
hsa-miR-200a	3.49918	4.93505	6.56234	6.51569	4.68639	6.60454	5.43718	4.36188	3.20475	5.53225	4.04558	-3.55385	-4.04109	1.2948	-1.35221	5.24694	2.64173	-4.81036	0.0698927	3.778	-4.20791	2.58615	0.272908	1.92024	-2.43617	3.07635	-3.93213	0.444696	-0.12909	1.61566	-1.06923	-4.20496	-4.07548	3.69782	-2.19405	-4.17632	-3.97002	3.84688	0.983332	1.65116	-5.10946	-4.75214	-2.2214	4.58227	-0.271198	-4.48586	-4.95843	0.486528	8.83077e-12
hsa-miR-203	1.99233	1.66754	5.06624	1.92807	4.91425	3.63469	5.10312	5.18042	-1.34791	1.63474	2.63118	-3.55385	-4.04109	0.0117533	-1.82253	0.0385627	-0.620039	-4.43433	-1.46406	-2.64462	-0.414969	-3.16316	2.25263	-4.45721	-4.39373	-3.41811	-3.63033	1.6474	-3.4098	-4.1264	-1.11178	-4.20496	-4.07548	-0.626749	-4.17078	-4.97844	-3.96538	-4.65934	-2.59974	1.77566	-5.02382	-4.75214	-1.11155	-0.314732	-3.46237	-4.48586	-4.95843	-4.27425	2.41399e-07
hsa-miR-155	-3.34749	-4.8537	-2.86422	-3.93473	-3.99592	-4.0246	-1.84047	-4.47452	-1.50346	-1.19482	-3.84671	-3.55385	-0.807055	1.62413	3.71902	-4.79233	-4.51951	-4.81036	-2.76271	2.51271	-2.82639	0.955715	3.1832	-2.14223	0.342748	2.55633	-1.90918	2.76106	-0.755261	5.11334	-1.66419	2.04467	0.366982	3.60867	-4.17078	-0.00663959	-3.97002	5.47723	1.93989	2.92895	3.1899	2.48795	-4.15851	5.45273	-4.21641	1.08355	1.40964	2.09347	1.3731e-06
hsa-miR-140	-0.401344	0.744235	0.925153	-0.223923	0.685667	0.122681	3.50342	1.44018	-0.786987	0.346545	2.38471	3.64489	4.50048	2.22792	4.26809	3.45346	3.47052	2.24506	2.38204	2.85834	2.48168	3.23483	2.84394	2.26944	4.72081	3.58504	3.71654	2.86921	3.54325	2.91649	3.65366	3.62825	3.5667	2.73949	3.15963	3.30571	6.33599	2.83609	1.46605	2.88038	2.95921	4.64285	5.70818	2.87449	3.16207	4.9416	4.44059	3.01009	9.4956e-06
hsa-miR-146	-4.39794	-0.172918	-3.02341	-2.94046	-3.99592	3.5257	-4.47259	-4.58362	-0.994284	-1.27118	-3.84671	-1.55217	3.3703	-2.644	3.19064	-0.711634	0.241624	-4.61973	-2.76271	1.33534	2.65437	5.63212	1.11969	-3.23911	3.21605	-2.9273	-3.07977	-0.333878	0.931044	7.82437	-1.69053	5.63783	8.35118	3.33992	5.32733	-0.256982	7.54175	1.40299	5.96659	1.46633	-0.276404	4.92764	6.66814	4.01194	8.19277	-1.68867	3.53964	6.4164	5.33459e-05
hsa-miR-204	-4.39794	-4.13711	-3.77377	-3.93473	-3.99592	-4.0246	-2.25753	-4.58362	-4.97007	-4.83096	-3.84671	-3.55385	-4.04109	-2.644	-4.19485	-4.79233	-2.74404	-3.58434	-2.52502	-4.6335	-3.12988	-1.84553	-4.27278	-4.48541	-4.39373	-0.675986	-4.03743	-4.07549	-1.85328	-4.1264	0.278286	-4.20496	1.60232	-4.3597	-1.79425	2.20162	1.93108	-3.77315	1.15444	-4.37395	-2.78577	3.32424	2.95429	-2.99754	3.41654	-4.48586	-0.217458	-3.69654	0.000143039
hsa-miR-105	-2.43586	-3.72117	-3.77377	-3.90697	-3.99592	-4.0246	-3.88098	-4.58362	-5.04902	-4.83096	-3.84671	-1.56344	-4.04109	-2.644	-4.19485	-3.60126	-4.51951	-3.66037	-2.76271	-4.6335	-2.76486	-2.98209	-4.27278	-2.45685	-4.39373	-2.51276	-2.0821	-4.32425	-4.44186	-2.25169	-2.29247	-2.80284	-1.03218	-4.3597	-4.17078	-0.581002	-0.750459	-3.40062	-3.04349	-4.16993	-1.76779	-3.71411	-0.866958	-4.14235	-0.967048	-2.26677	-4.06846	-2.33338	0.000764441
hsa-miR-375	-2.50391	-1.26459	1.92416	1.88681	5.47349	1.40587	4.05919	6.37266	3.75847	-3.37883	-3.84671	-2.77527	-4.04109	-2.48989	-4.19485	3.55062	0.121438	-0.823153	-2.34445	-1.4877	-0.535944	-3.0452	-4.27278	2.12173	-4.39373	-2.44794	-4.03743	-2.63471	-4.44186	-4.1264	-1.01998	-4.20496	-4.07548	-3.02596	-3.04449	-4.97844	-3.89551	-4.65934	-2.00986	-2.76394	-5.10946	-4.75214	-2.93789	-0.740117	-4.21641	-4.47673	-4.95843	-4.26607	0.00150917
hsa-miR-299	-4.39794	-4.8537	-3.77377	-3.93473	-3.99592	-4.0246	-4.47259	-3.92907	-6.48133	-4.83096	-3.84671	-3.55385	-4.04109	-2.644	-4.19485	-4.79233	-4.51951	-4.81036	-2.76271	-4.6335	-1.86282	-4.6212	-4.27278	-4.10568	-1.7049	-1.05938	-4.03743	-4.32425	-3.68658	-4.1264	-4.58336	0.196768	-4.07548	-4.3597	-4.17078	-2.09703	-3.97002	-4.65934	-3.04349	-4.37395	0.794025	0.706228	-4.15851	-4.14235	-4.21641	-1.34211	0.955788	-4.27425	0.00162048
hsa-miR-137	-4.39794	2.27362	-3.77377	-3.93473	-3.99592	-4.0246	-4.47259	-3.06945	-6.31537	-1.74357	-3.84671	-3.55385	-4.04109	-2.644	-3.19671	-4.79233	-3.72787	6.05953	0.259481	-4.6335	-0.769117	3.01335	-1.50213	-4.48541	4.14897	-2.22612	3.28782	-2.78592	1.48307	3.15603	0.754721	-0.33317	-0.137042	-4.3597	-0.833325	-3.35498	-2.97503	0.707407	-3.04349	-4.37395	3.85178	1.506	0.0784998	-2.5739	-3.58352	2.09106	3.39415	-1.25913	0.00253092
hsa-miR-321	4.15861	2.68436	5.69465	4.86237	4.24456	4.36181	3.64078	3.63749	3.75847	3.90297	3.00384	6.26165	7.26024	4.26168	5.61109	3.71713	3.74243	3.64445	5.93537	3.55001	4.07234	3.787	4.71795	6.09039	4.59279	4.90328	4.73082	5.01148	4.71211	4.56989	4.63943	5.86182	6.46584	4.58852	5.32071	4.81597	4.98748	4.96428	6.30249	5.88987	4.49284	4.53587	3.73247	4.93512	5.26122	4.66252	3.72853	5.33816	0.00283512
hsa-miR-211	-4.39794	-3.49451	-3.77377	-3.93473	-3.99592	-4.0246	-4.47259	-4.58362	-5.85759	-4.83096	-3.84671	-3.55385	-4.04109	-2.644	-1.33007	-4.79233	-1.51177	-4.81036	-2.76271	-4.6335	-1.35417	-2.19808	-4.27278	-4.48541	-4.39373	-1.37449	-4.03743	-4.32425	-4.33573	-4.1264	-4.22951	-4.20496	1.92313	-4.3597	-2.33446	-4.72063	-2.64472	-4.65934	4.77729	-4.37395	-5.10946	-4.75214	-1.62879	-4.14235	4.40746	-4.48586	-4.95843	-2.27893	0.00329705
hsa-miR-134	-4.39794	-4.8537	-3.77377	-3.93473	-3.99592	-4.0246	-4.47259	-4.58362	-6.48133	-4.83096	-3.84671	-3.55385	-4.04109	-2.644	-4.19485	-4.79233	-4.51951	-4.81036	-2.76271	-4.6335	-1.93002	-4.6212	-4.27278	-4.48541	-4.29512	-2.96428	-4.03743	-4.32425	-4.44186	-4.1264	-4.58336	-1.0759	-4.07548	-4.3597	-4.17078	-1.89368	-3.97002	-4.65934	-3.04349	-4.37395	0.0391423	-0.387173	-4.15851	-4.14235	-4.21641	-1.56873	-2.12692	-4.27425	0.00414267
hsa-miR-127	-4.39794	-4.8537	-3.77377	-3.93473	-3.99592	-4.0246	-4.47259	-0.789336	-6.48133	-4.83096	-3.84671	-2.91276	-4.04109	-2.644	-4.19485	-4.79233	-4.51951	-3.14156	-2.76271	-4.6335	0.684442	-4.6212	-4.27278	-4.48541	-0.684779	0.587602	-4.03743	-4.32425	-1.26221	-4.1264	-2.31681	2.16465	-4.07548	-4.3597	-4.17078	0.949383	-3.97002	-4.65934	-3.04349	-4.37395	3.57033	3.22689	-4.15851	-4.14235	-4.21641	0.903257	1.96224	-4.27425	0.0058108
hsa-miR-223	-4.39794	-4.8537	-3.77377	-3.93473	-3.99592	-4.0246	-4.47259	-2.60556	-6.48133	-4.83096	-3.84671	8.1978	10.1046	4.06729	8.7527	-4.79233	-2.95251	-4.81036	-0.813899	-4.6335	-4.62518	-4.6212	-4.27278	-4.48541	-4.39373	-4.28297	-1.801	-4.32425	-4.44186	-4.1264	3.9211	-4.20496	-4.07548	-4.3597	-4.17078	-4.97844	-3.97002	-4.65934	-3.04349	-0.605388	-3.01464	-2.00698	-4.15851	-4.14235	-4.21641	-4.48586	-4.95843	-4.27425	0.00648777
hsa-miR-22	1.52327	1.26395	1.0519	-0.425277	0.338608	0.2533	0.884669	-0.938237	-2.12175	-0.502515	-0.935829	0.718903	-3.51016	-2.644	-1.19329	0.0237	-1.35293	0.840639	0.821356	1.13635	0.853748	1.53294	2.07319	0.738729	2.68038	0.966226	2.00181	1.51323	2.06227	1.92426	1.4938	3.1478	0.816247	0.768126	2.06217	2.90791	0.144798	1.33382	0.304124	2.68424	2.47304	2.25223	0.47382	0.823343	2.01786	2.16445	3.42821	1.59342	0.00759495
hsa-miR-34a	-0.283192	1.52515	-3.77377	0.34003	1.07129	-0.161215	-0.101577	0.613869	3.75847	-0.195463	0.0707921	-3.55385	-3.88991	-2.644	-3.01216	-1.33991	1.35818	-4.08869	-0.606705	-2.3516	1.76403	1.65639	-2.52656	-3.02825	-1.82699	2.38655	-3.23504	-1.75011	-0.701954	0.832591	-2.69673	-4.20471	-4.07548	2.80627	-1.96796	-1.77628	-2.97881	-2.19346	-2.78176	1.39053	-1.79791	-0.28873	2.0891	0.115823	2.01575	-4.48586	-3.87425	1.3643	0.0110661
hsa-miR-197	2.19132	2.08757	1.14363	2.28721	2.65847	1.37414	2.03198	2.8535	0.601543	2.12723	3.78786	3.90432	3.61358	1.07254	3.18091	1.31764	2.63038	3.5932	1.87184	1.7539	2.94243	2.45374	2.68751	2.94824	3.5894	3.80464	3.06045	3.06108	1.13761	2.82588	2.74953	2.21248	2.4298	2.7903	3.42209	3.1179	4.14501	3.94209	2.42318	1.82	2.64066	2.64225	3.02073	3.65691	2.88038	3.45591	3.15378	2.82488	0.011883
hsa-miR-125b	4.47526	2.38004	-3.77377	-2.05688	2.36779	1.14685	-0.897853	3.90237	0.517059	7.75651	7.10056	-2.28539	2.87793	-2.644	-3.00178	3.93855	1.64436	8.04762	-2.76271	2.19862	3.95258	7.03434	5.84726	8.5296	7.41203	3.4254	6.67869	3.89704	7.58394	8.83227	7.49924	8.94637	6.10089	3.09202	7.72783	7.45258	6.51732	5.70344	2.28714	6.38511	8.35288	7.12036	7.36544	4.00966	5.52368	7.27651	8.89185	8.47881	0.0122416
hsa-miR-213	-4.12306	0.313784	-3.77377	-1.99217	-3.2207	-2.34659	-3.40852	-0.665289	-2.41294	-2.79829	-1.76841	-3.55385	2.47475	1.25551	3.04989	-0.939513	-4.51951	-4.16688	0.250848	-0.660388	-2.20468	0.426901	-1.86759	-2.62724	-4.39373	-0.884704	-3.45036	-2.36017	-0.360029	0.129148	-0.569604	-0.220381	-0.987568	-0.799072	-0.549856	-0.421766	-0.0599159	-1.14596	-0.807292	-2.81385	-1.63471	-1.19408	-1.06166	-2.65561	-3.19408	-1.54163	-0.127532	-0.274747	0.0126443
hsa-miR-181b	4.1315	6.43164	2.69992	4.56721	4.5723	3.80305	2.25212	6.48324	2.87102	4.15053	3.92705	0.597417	8.15075	6.37004	8.41573	4.39614	2.36133	5.12721	5.72242	5.59719	4.82302	5.93555	4.91781	4.36327	3.98596	6.40212	4.49371	5.32856	5.12862	5.81259	6.4491	5.3808	4.64899	5.88623	5.61932	6.28265	6.23251	5.85957	4.88873	5.17295	4.77636	5.03278	6.04191	5.20009	4.26479	5.8573	5.37106	5.48448	0.0131763
hsa-miR-30a-3p	3.76657	2.25996	-3.77377	-1.77059	2.20311	-2.541	-1.52542	2.28802	-2.62409	3.06316	-1.80324	-2.11107	-1.94082	-2.644	-1.05783	-2.00357	5.96667	4.88123	-2.76271	3.50909	3.24408	5.05534	4.09069	-0.774073	3.29456	4.95584	3.42723	3.19847	3.74558	2.42732	3.19561	1.52919	2.66302	5.45789	4.57264	2.73814	2.12763	3.86659	-2.00658	3.23865	2.73065	1.71996	2.21144	2.41894	1.09371	2.00004	2.35607	3.71019	0.014787
hsa-miR-95	-2.60873	-0.161876	-0.449288	-3.93473	-3.99592	-4.0246	-0.388088	-0.711826	3.75847	-2.49502	0.261425	-3.55385	-4.04109	-2.644	-3.76013	-0.304374	-2.28728	-1.2135	-2.70733	-2.54457	-0.368632	-4.6212	-1.78439	-4.48541	-3.04229	-4.28297	-2.26692	-0.841004	-4.44186	-4.1264	-3.37176	-4.20496	-4.07548	-1.43978	-2.35429	-4.97844	-3.97002	-4.65934	-3.04349	-3.65865	-5.10946	-4.75214	-4.15851	-0.341242	-4.21641	-4.48586	-4.95843	-0.435313	0.0154177
hsa-miR-7	1.51228	0.968894	4.04166	4.87973	0.435737	4.35235	-0.154678	3.67139	3.75847	0.522532	-3.84671	0.39542	-1.16958	0.735807	0.649081	3.26689	-0.202316	2.65228	2.42537	-1.12183	2.17049	-2.705	-0.559292	-1.81413	0.286695	-2.17318	1.74855	-2.44713	-1.01155	1.24872	-3.82313	-0.96021	0.575329	0.16489	0.395941	-2.79385	1.23775	-1.44177	1.17893	1.63779	-1.5601	-0.118492	-0.889666	0.0345485	1.67544	-0.30429	-2.9497	-1.55657	0.0157675
hsa-miR-100	4.52628	1.4631	-2.49182	-0.897032	2.12204	0.226383	-0.648134	3.63817	0.300407	7.4269	7.07537	-2.07104	2.45242	-2.644	-3.09775	3.5388	0.356327	7.26391	-2.76271	2.20663	3.41533	6.73382	6.62178	8.68506	6.80894	-1.4686	6.82012	2.9144	7.38701	9.39889	6.5989	8.72237	5.92961	2.54745	8.04943	6.65589	6.69433	5.92201	1.93983	5.54429	7.60065	6.67803	7.60133	4.33691	5.3591	6.67158	7.20699	8.51795	0.0159219
hsa-miR-29a	5.87473	5.63831	7.32098	6.33856	3.86979	5.77054	7.1844	4.50728	4.55519	4.28665	7.08455	3.64772	5.76456	5.16566	5.49535	7.29765	3.83386	5.55043	6.84089	6.98276	6.39173	6.09596	8.25928	6.71289	6.69163	7.15767	6.93988	7.84182	6.63195	7.21196	5.64791	7.01085	7.92486	6.78233	7.74547	5.97662	7.4736	6.18846	6.55427	7.46532	7.80485	6.53703	5.59534	6.1223	8.52062	5.652	7.13667	8.5561	0.018346
hsa-miR-199b	-4.39794	-4.8537	-3.77377	-3.93473	-3.99592	-4.0246	-4.47259	-4.58362	-6.48133	-4.83096	-3.84671	-3.55385	1.63052	-2.644	-3.87469	-4.79233	-4.51951	-4.81036	-2.76271	-4.6335	-4.62518	-4.6212	-4.27278	-4.48541	-4.39373	-4.28297	-4.03743	-4.32425	-4.44186	-4.1264	-4.58336	-4.20496	-4.07548	-4.3597	-4.17078	-4.97844	-3.97002	-4.65934	-3.04349	-4.37395	-5.10946	-4.75214	-1.057	-4.14235	-4.21641	2.19399	1.38797	-4.27425	0.0199265
hsa-miR-196b	0.719506	2.0353	0.103782	3.13901	3.65503	1.56176	1.74179	2.71079	1.13492	3.70649	3.72256	-1.90914	-2.35651	-2.644	0.852168	3.80255	-2.14769	-0.885456	-1.81224	1.13464	-0.334941	3.22855	1.57179	3.43286	2.48429	5.46931	0.687127	3.12132	0.902159	0.858031	0.394565	-0.134636	0.116689	4.07429	-2.96026	1.34041	-0.881814	5.28788	0.486621	5.32942	0.70835	0.809639	1.08982	3.81551	-0.441013	2.55706	2.7909	0.394866	0.0229981
hsa-miR-205	-0.8086	7.7355	-3.77377	6.25845	3.73478	-4.0246	-4.47259	-1.37058	-6.48133	3.17517	-3.84671	-3.55385	-4.04109	-2.644	-4.19485	-4.79233	-4.51951	-4.81036	-2.76271	-3.70593	-4.62518	-4.6212	-4.27278	-4.48541	-4.39373	-4.28297	-4.03743	-4.32425	2.0064	-4.1264	2.13146	-4.20496	-4.07548	-4.3597	-4.17078	-4.97844	-3.97002	-4.65934	0.814943	-4.37395	-5.10946	-3.91809	-4.15851	-2.01876	-2.39084	-4.48586	-4.95843	-4.27425	0.0237498
hsa-miR-28	1.15861	1.62562	1.06522	0.563602	1.52819	1.61043	0.176357	-0.0180457	-1.21836	1.71896	1.76099	-3.55385	0.144246	0.450132	1.66897	1.40014	2.04869	1.93256	-0.0662158	2.4278	1.92976	2.64921	0.800744	1.17631	2.08452	1.71494	1.94823	-0.0459488	1.56501	2.20349	1.74257	1.6604	2.70265	1.14097	2.05361	1.76553	1.94841	2.64755	0.533603	1.74889	1.87932	3.06498	1.61698	2.40108	2.82312	2.68783	2.96291	2.62566	0.0239103
hsa-miR-194	-0.74516	0.676843	7.3968	5.27822	1.28602	7.62143	2.45884	-0.00935474	5.47269	-0.920415	0.0284723	1.82936	-0.986072	2.60247	0.339158	6.27817	0.647289	0.146256	1.35092	3.16233	-0.699366	-0.254418	0.00548594	0.134577	-0.926127	2.71181	-0.969846	0.574819	0.00744591	-0.273306	-1.69825	0.637873	1.20068	3.24174	0.747223	-0.548447	-0.876697	-0.279196	1.70661	1.24553	-1.01616	-0.627938	-1.3918	-1.29166	-0.799744	-3.06031	0.342848	0.291799	0.0250995
hsa-let-7a	3.28623	4.52171	4.92907	4.30549	5.57153	4.91817	4.94972	5.44905	3.68111	5.28445	6.04577	3.25159	6.22189	4.10979	5.48461	4.16716	4.36364	5.66091	3.29695	6.31852	4.32133	5.87659	4.99508	7.64773	6.66715	4.8505	6.16441	5.97196	6.24822	2.02141	5.63497	6.82278	5.98297	5.46212	5.88571	7.14095	4.68386	6.74063	4.37103	5.16268	5.87731	5.00969	5.92396	5.28262	5.59805	6.02927	6.86459	5.80643	0.0253382
hsa-miR-32	-0.668476	0.985537	1.16977	0.819854	1.65626	1.47068	1.64424	1.95368	3.75847	0.578786	0.860062	2.5032	2.68614	1.02559	2.61008	1.41719	1.46737	0.92232	0.0627367	0.628991	2.17163	0.17225	0.161837	0.779239	0.549559	0.192908	0.786404	0.98215	-0.256561	0.357923	-0.43927	-0.788742	0.500024	1.32062	1.67728	0.130479	-0.133643	0.871168	-1.95331	-0.572165	0.997385	-0.101326	-0.506359	-0.447008	0.933209	-0.651059	-1.45803	0.910645	0.0271822
hsa-miR-30e-3p	2.70173	2.01877	0.558028	-0.30247	1.69386	0.0248853	1.41148	1.99164	3.75847	2.74975	1.85333	2.24748	2.85655	1.20147	2.78122	0.407623	4.34417	4.11252	4.91489	2.75265	1.96479	4.54444	2.77279	1.84349	2.4406	3.35208	2.96016	2.78222	2.81637	1.8637	2.03699	1.80959	2.87591	4.24231	3.17825	2.16611	2.37121	3.23171	1.74908	1.88512	1.54152	1.42453	1.86576	1.48365	1.98248	1.97994	1.87976	2.40053	0.0275709
hsa-miR-96	-1.18638	-2.47329	-2.11882	-2.76566	-2.81576	-3.43858	-1.44432	-0.473597	3.75847	-1.7002	-0.445288	-0.649117	-4.04109	-2.644	-4.19485	-0.702378	-1.4474	-0.120055	-2.63036	-3.0344	-1.23619	-3.60507	-2.36517	-1.33431	-2.81546	-2.51193	-3.52718	-2.74713	-3.08431	-3.85571	-1.9968	-3.22913	-2.72195	-1.16134	-2.65825	-0.902522	-3.97002	-1.75296	-3.04349	-1.49141	-3.80994	-4.75214	-4.15851	-3.82745	-3.88007	-4.48586	-2.83097	-1.90126	0.0284363
hsa-miR-99a	4.52871	1.27558	-2.99711	-1.43597	2.02217	0.196228	-1.13405	3.57908	3.75847	7.26449	6.79702	-2.71789	2.1898	-2.644	-3.25041	3.24695	-0.0866769	7.1638	-2.76271	2.07472	3.19546	6.42088	6.15307	8.44442	6.97147	-1.84612	6.40584	3.16205	7.12176	9.21951	6.49512	8.46728	5.6813	2.68392	7.83023	6.67967	6.50452	5.61097	1.87663	5.38047	7.39053	6.2992	7.38825	4.01278	5.12686	6.42879	6.93065	8.20809	0.0298953
hsa-miR-192	-0.256835	1.07614	8.05387	5.46203	1.79381	7.62432	2.76903	0.871813	6.17971	-0.132006	-0.604246	3.03165	0.146557	3.04455	0.85308	6.41977	1.41792	0.62935	1.88185	3.6783	-0.176586	0.33905	0.428255	0.779757	-1.18685	3.68055	-0.759516	0.662286	0.205015	0.356991	-0.889925	1.34672	1.73072	3.66212	1.28043	-0.502229	-0.571383	-0.113206	1.94571	2.23143	-0.926841	-0.545231	-0.446239	-0.875433	-0.324561	-1.98341	0.61918	0.676156	0.0300995
hsa-miR-27a	6.85814	6.50185	4.5454	4.70244	4.81862	4.41659	6.6986	5.12268	2.26239	5.41448	5.37832	4.98594	7.18953	1.22189	2.59835	6.45837	4.74946	6.41445	6.57883	5.68463	5.50974	6.68865	6.33307	6.33079	6.42105	5.72235	6.88855	5.94627	5.96225	6.14063	5.53308	8.07919	5.92403	6.03629	6.2634	7.13057	6.69453	6.85468	6.90714	6.39428	7.20521	6.02384	5.87367	6.32659	5.24727	5.61322	6.75458	6.565	0.0315807
hsa-miR-424	-1.31685	-0.625903	-3.77377	-3.93473	-3.99592	-3.88694	-3.03259	-0.475475	3.75847	-2.26596	-3.84671	-1.43311	-0.416482	-2.38591	-0.594229	-0.469378	-0.771877	-3.26029	-0.203693	-0.564091	-0.789192	-0.688069	2.4749	-1.21928	2.92745	-2.89267	4.84541	2.42271	-1.04647	-2.1522	-2.15289	-1.02438	-1.83898	-1.85368	-0.389554	0.289225	-1.03544	1.88409	-2.48282	1.5391	3.01326	-0.585061	-1.35132	0.445904	-2.24162	-0.149771	-4.95843	-1.22483	0.0321252
hsa-miR-192	0.537793	1.00488	7.8378	5.5401	1.78757	7.47717	2.55452	0.675857	5.89862	-0.477962	-0.570162	2.80411	-0.241918	3.49465	0.792403	6.46374	1.11561	0.542781	2.26936	3.5854	-0.332532	0.985507	0.488206	0.529194	-1.0935	3.63661	-0.937847	0.964027	0.367782	0.032081	-0.301535	1.65742	1.52656	3.80313	1.37717	0.00191741	-0.394889	-0.165123	2.40558	2.11802	-1.24686	-0.805652	0.289895	-1.15695	-0.624563	-1.72354	0.634446	0.667633	0.032471
hsa-miR-21	7.2788	9.25916	7.66236	6.96281	7.03146	8.08116	7.83656	8.5808	6.06979	6.62901	8.7632	6.48513	6.44839	4.67925	6.13171	8.92073	8.20678	9.57446	8.5793	8.80004	8.6998	10.4171	8.33029	8.57464	8.52565	9.13869	7.21205	9.10729	9.51828	8.52106	10.3679	10.5652	6.93859	9.75614	8.94464	10.4446	8.00073	8.81662	5.28957	8.95177	7.616	8.48418	7.78098	5.3243	8.5447	9.40265	9.07377	9.92734	0.0329627
hsa-miR-181a	3.72315	6.93075	1.86323	3.7852	3.97994	2.81806	2.63084	5.25298	2.87422	3.23076	2.92443	-0.853753	8.56396	6.78027	8.5575	5.44555	1.58941	4.11376	4.88657	4.60058	3.68542	5.60604	3.58763	3.83242	2.37621	4.87737	2.87582	4.70815	4.86945	4.9599	4.54005	4.22254	3.55242	5.21814	5.17248	5.08358	5.09486	5.70866	4.17687	4.21517	4.83873	5.09592	4.56033	4.38954	3.44905	4.31622	6.04798	5.57741	0.0346543
hsa-miR-30a-5p	5.68318	5.96711	4.14394	5.01104	5.22735	3.49397	4.17098	5.61363	3.75847	5.18542	4.25269	4.92874	6.01682	4.06561	4.99647	4.50371	7.95331	6.30209	3.45732	5.63383	6.17868	6.83514	6.02489	4.76135	5.21641	5.8907	4.61292	6.21076	5.37777	4.21233	5.4295	3.73415	6.16159	7.2311	5.56958	4.75527	5.23279	5.86387	4.59573	5.81803	4.48075	4.78253	5.08372	5.04296	5.76511	4.03369	4.87569	5.66902	0.0385028
hsa-miR-132	-1.31309	0.169729	1.87956	-1.27129	0.54041	-1.49194	0.193557	0.958198	-1.64587	-1.58325	1.27084	1.08975	-2.88652	-2.37985	-0.868057	1.55595	1.06721	1.74823	-0.289586	-0.482579	2.99598	-1.31211	0.0716782	-0.627749	1.92411	-0.301527	0.870235	-0.485996	0.193221	2.35611	2.82906	1.34018	2.41668	0.115211	1.75786	2.11027	1.14104	1.28334	-0.264383	2.25506	0.359721	0.353382	0.678342	-0.888934	1.25643	0.0886384	1.03842	1.162	0.0398391
hsa-miR-135b	4.33105	5.7803	4.19112	3.45572	-0.70927	5.36808	1.59293	4.09334	-0.221874	4.75554	4.11488	2.06795	-3.72382	-0.393222	-0.242471	5.39277	3.33521	0.32619	5.12148	3.40048	-1.10978	2.24393	1.83677	1.65103	5.43237	2.60827	-1.38454	1.70767	2.02098	-0.0384338	3.52274	1.89464	2.34562	3.27558	2.77124	6.43793	3.42284	2.75476	1.79863	3.41051	-1.66145	3.56858	2.2757	2.06007	2.56855	-0.596319	-1.30201	3.3775	0.0403356
hsa-miR-215	-4.39794	-4.8537	1.44409	-1.02245	-3.99592	0.356454	-4.21651	-4.58362	2.05535	-4.83096	-3.84671	-3.24623	-4.04109	-2.644	-4.19485	-0.636931	-4.51951	-4.81036	-2.76271	-3.14947	-4.62518	-4.6212	-4.27278	-4.48541	-4.39373	-4.28297	-4.03743	-4.32425	-4.44186	-4.1264	-4.58336	-4.20496	-4.07548	-4.26183	-4.17078	-4.97844	-3.97002	-4.65934	-3.04349	-4.37395	-5.10946	-4.75214	-4.15851	-4.14235	-4.21641	-4.48586	-4.95843	-4.27425	0.0417398
hsa-miR-30c	7.00843	6.14071	4.39632	4.58334	5.51644	4.987	5.69133	6.04724	3.75847	6.39711	4.8772	5.84306	6.39536	5.00583	6.46602	5.00085	8.18097	7.44052	4.41973	6.24032	6.628	7.70601	6.35626	5.14002	6.05404	7.46022	6.07961	5.6469	6.14146	5.4287	6.13846	4.94202	6.53301	7.86308	7.09632	5.90108	5.57546	6.71416	3.41511	5.963	5.92391	5.21924	5.93195	5.40438	5.33011	5.12393	5.32148	6.46646	0.0426075
hsa-miR-148a	3.11727	3.49446	2.44095	-3.90855	3.23416	3.31379	4.03573	3.67382	0.249256	2.61988	1.83936	3.09703	5.61518	3.79304	3.1706	3.25507	0.699679	-0.943907	2.68792	1.40315	1.9548	-0.253017	1.60478	-1.85085	-2.95977	-0.450631	-2.21639	0.946209	0.737087	-4.1264	0.367345	-1.65944	-3.9155	-0.777501	-1.07083	1.87404	2.47323	0.678723	-0.30825	1.97385	2.286	2.15612	3.72032	0.888322	3.50138	3.46672	-1.34338	-2.2716	0.0435979
hsa-miR-107	0.938649	0.290153	-1.7569	0.236924	-0.271934	-0.486924	0.312064	-0.230261	-3.68108	-0.143816	-0.502525	-2.18339	-1.45799	-1.12771	-0.58676	0.193251	-1.06354	1.42947	-2.43624	-0.843035	-0.319531	-1.61905	-1.43384	-1.30651	-0.524271	-2.22106	-1.06301	-2.62175	-1.20769	-1.0218	-1.96418	-2.83482	-1.46047	-1.21218	-0.743008	-0.595696	-0.400287	-0.129329	-3.03577	-2.9911	0.0877163	-1.66494	-1.06019	-1.30769	-1.86694	-0.47871	-1.95562	-0.761089	0.0436639
hsa-miR-24	7.30027	7.06396	5.65444	5.5952	6.67211	6.60069	6.71785	5.29833	3.86706	6.81165	6.13846	5.36723	6.63432	1.8817	3.47968	6.68694	7.84981	6.95551	6.25629	6.79916	7.34302	7.55015	7.19312	7.38455	7.46706	5.83627	7.16216	6.35594	6.61927	7.56821	7.1579	8.05847	6.49238	7.14313	7.4852	7.91114	6.69674	7.38418	4.63186	7.15046	7.6713	7.41165	6.84828	7.00527	7.15905	7.31199	7.77304	7.51845	0.0476177
hsa-miR-130aN	5.41427	3.8524	-3.77377	-1.0224	6.00266	-2.61278	-4.17075	-1.88418	-4.64238	4.9567	3.44056	-3.05062	-4.04109	2.70183	3.50596	-4.64782	-3.06743	6.2681	-2.46514	4.85516	4.59124	4.09995	6.17602	0.608715	4.03533	4.34909	5.55683	5.54066	5.04859	5.62059	3.5678	2.75492	3.56437	4.03428	4.87031	3.63863	3.5148	3.68398	2.35944	2.05349	5.67704	3.67602	1.30881	1.42597	3.62615	4.4366	4.22974	3.22746	0.0507357
hsa-miR-139	-4.39794	-4.8537	-3.77377	-3.93473	-3.99592	-4.0246	-3.76772	-3.6476	-6.48133	-4.83096	-2.47401	-3.55385	-4.04109	-2.644	-4.19485	-4.79233	-2.39796	-4.81036	-2.76271	-3.34892	-4.25259	-3.11074	-4.27278	-3.72486	-4.39373	-3.7231	-4.03743	-3.17975	-4.44186	-2.74797	-3.79852	-4.20496	-2.44475	-3.74677	-3.40199	-2.97042	-3.72542	-3.71612	-3.04349	-1.71945	-3.97637	-4.75214	-4.15851	-4.14235	-3.72049	-4.48586	-3.24315	-2.99244	0.053334
hsa-miR-210	2.10153	2.68414	1.35536	1.82063	3.07177	1.13757	2.97959	2.36613	1.54429	1.28682	3.48528	2.23772	-0.715915	1.10016	3.07542	2.22589	3.67682	3.0555	3.15402	4.74239	1.60351	1.20892	1.6134	3.80179	1.57675	2.1807	3.96971	1.68444	2.44614	3.16856	3.63126	2.32398	1.2833	2.9318	4.11859	4.73755	0.136004	4.87356	1.64629	3.66981	3.74555	2.94701	2.03533	5.04713	2.26347	4.43946	1.47674	3.19813	0.0545998
hsa-miR-324-5p	2.00578	3.12573	1.46165	2.00502	3.46708	2.48194	3.03868	3.21938	3.75847	2.28404	3.18511	1.81059	0.724378	0.704265	3.18921	1.88173	3.03283	3.83059	1.64047	2.9891	3.55888	1.68591	3.14318	2.36357	3.41967	1.59893	2.58082	2.26244	1.54018	3.4773	1.74606	1.38833	2.96563	1.81608	2.66562	2.44008	2.36363	3.02527	3.67434	0.754515	3.28627	0.768562	3.5813	1.82444	2.41265	2.74213	0.402158	1.24733	0.0562265
hsa-miR-335	-0.101159	-4.8537	0.934734	0.223831	-3.99592	0.798831	-0.227685	1.50792	3.75847	3.6772	0.0496141	-3.55385	2.02062	-2.34559	-4.19485	0.00418247	-2.40858	-2.86743	-2.76271	0.00772888	-0.499706	-2.22641	1.79803	0.948546	0.0450791	-4.28297	1.84927	1.92548	1.03822	-3.9084	0.617993	-2.0935	-4.07548	0.362793	0.229584	0.792499	-3.97002	-4.65934	-3.04349	-4.37395	3.59364	-2.35169	-4.15851	-2.93501	-0.748567	-4.48586	0.472786	1.13738	0.0579172
hsa-miR-128b	-4.39794	-4.8537	-3.77377	-3.93473	-3.99592	-4.0246	-4.47259	-4.58362	-6.16721	-4.83096	-3.84671	-3.55385	-4.04109	0.0361038	-0.43686	-4.00414	-4.51951	-4.81036	-2.76271	-4.6335	-4.62518	-3.71511	-4.27278	-4.48541	-4.39373	-3.78589	-4.03743	-4.32425	-4.44186	-4.1264	-4.24398	-4.20496	-4.07548	-4.3597	-4.17078	-4.75187	-3.97002	-4.65934	-3.04349	-4.37395	-5.10946	-4.75214	-3.67398	-4.14235	-4.21641	-4.48586	-4.95843	-4.27425	0.0600586
hsa-miR-130a	4.34438	3.40293	-3.77377	-2.11163	4.60323	-3.80876	-0.346218	-1.12581	-3.42532	3.36916	2.31337	0.559287	-1.31863	1.72415	2.65757	-1.42182	-1.1375	5.06051	-1.78041	3.57229	3.01143	2.70479	4.77575	-0.456433	2.65342	2.60078	4.43443	4.38917	3.72924	3.88734	1.28374	1.20831	2.26475	2.24875	3.36186	1.89476	2.28897	2.54201	3.32522	-0.128154	4.65197	2.42168	0.150151	0.512083	2.39693	2.80483	2.77307	1.53508	0.0602537
hsa-miR-153	-4.39794	-4.8537	-3.47203	-3.93473	-3.99592	-3.47311	-4.45162	-4.58362	-6.48133	-4.83096	-2.76587	-3.55385	-4.04109	-1.0471	-1.09752	0.254771	-4.51951	-4.81036	-2.76271	-2.97277	-2.68714	-4.6212	-2.8779	-1.79412	-4.39373	-4.28297	-4.01713	-2.23304	-4.44186	-4.1264	-4.32207	-4.20496	-4.07548	-4.3597	-4.17078	-4.61125	-3.97002	-4.65934	-3.04349	-4.37395	-5.07099	-4.75214	-4.15851	-4.14235	-4.21641	-4.48586	-4.95843	-4.27425	0.0620557
hsa-miR-135a	0.46748	1.69071	1.68925	0.0793002	3.7403	4.04085	-0.974849	1.30196	-4.2021	2.43047	-0.180786	0.0712204	-1.94298	-2.34677	-1.19137	3.82377	1.03939	-1.54381	2.68943	0.72724	-3.61834	-0.544473	2.62087	-1.05267	1.051	0.356726	-4.03743	2.79431	-0.940581	-2.66724	0.818649	-2.28594	-0.322833	-0.278638	0.680629	4.58095	1.53321	-0.462238	-1.65041	0.445001	-3.60151	1.72858	-0.781187	-1.17061	-0.208675	-3.28929	-2.36737	0.801089	0.070956
hsa-miR-9	-2.88327	5.61576	4.33677	-3.93473	-3.06929	-2.5177	-2.49881	1.26445	3.75847	-0.178225	3.38183	3.10771	-0.181114	1.07202	4.21004	4.00933	1.66425	4.21071	2.54636	-0.432645	3.85294	0.00629549	3.67713	6.10899	-0.638935	-2.54741	-0.602896	2.49587	1.6069	1.0061	8.71435	8.23967	4.26713	-4.3597	-0.700175	8.46472	4.55821	3.41907	1.81413	-0.678432	4.58077	3.78941	1.92298	-3.26644	3.98009	1.54331	-3.05508	-0.090872	0.071052
hsa-miR-302b	-4.39794	-4.8537	-3.77377	-3.93473	-3.99592	-4.0246	-4.47259	-4.58362	-6.48133	-4.83096	-3.84671	-3.55385	-4.04109	-2.644	-4.19485	-4.79233	4.2314	-2.8518	-2.76271	-4.6335	-4.62518	-4.6212	-4.27278	-4.48541	-4.39373	-4.28297	-4.03743	-4.32425	-4.44186	-4.1264	-4.58336	-4.20496	-4.07548	-4.3597	-4.17078	-4.97844	-3.97002	-4.65934	-3.04349	-4.37395	-5.10946	-4.75214	-4.15851	-4.14235	-4.21641	-4.48586	-4.95843	-4.27425	0.0791424
hsa-miR-92	6.84935	7.86457	9.00666	7.85843	6.37636	9.5307	7.38357	7.51248	3.75847	7.24541	-3.84671	11.9646	10.6336	8.95382	9.55803	9.30068	7.44619	8.024	8.22608	8.36592	7.39827	7.09052	8.62307	9.35706	7.72345	7.70781	7.60276	9.1494	7.71042	8.9427	7.04596	7.0947	8.2595	8.27794	7.77224	6.81832	7.75012	6.77929	7.77297	7.37309	6.77207	6.73238	7.63483	7.3934	7.28291	7.08226	7.565	7.88172	0.0795217
hsa-miR-222	7.00482	6.95172	6.12068	7.48152	-3.54864	6.77762	6.8362	3.12766	4.17829	7.55388	8.46773	2.90472	6.56928	4.18849	5.60783	6.72585	7.92882	8.56775	6.01207	7.66756	5.4731	6.041	8.27446	7.50237	6.38533	6.24886	8.63689	7.33159	8.15554	8.677	8.00862	8.18602	7.14335	6.75515	9.76496	7.43316	7.1929	7.13586	7.25804	6.71598	8.87571	7.69878	6.17309	6.55904	7.40732	5.54503	7.6523	8.70628	0.0803237
hsa-let-7d	2.04196	3.6279	2.87181	3.22535	1.0961	1.95421	2.83746	3.51715	0.0917704	2.32262	2.60868	-3.55385	3.23383	1.59992	2.48936	1.58479	-1.02229	2.98866	1.86592	2.67399	2.59228	1.67525	1.31112	3.55004	3.02781	1.22111	2.04769	1.90181	2.30209	-1.34225	0.429718	1.17297	2.7533	2.42095	2.45777	2.16781	1.94172	3.27136	2.83183	2.08423	2.78803	2.51272	0.577503	2.4948	1.8837	2.67048	2.42826	-0.0857455	0.0816219
hsa-miR-221	6.40248	5.75824	2.73417	6.66925	-3.99592	5.36287	5.09385	0.699493	1.35562	6.18232	7.1744	1.86803	5.69162	2.15599	3.82256	4.62401	6.29812	7.99183	5.23135	6.19022	3.68027	5.41964	7.04838	6.04758	5.27898	4.44867	6.59657	4.49936	6.77418	6.7946	6.36559	6.4833	5.69727	5.89993	8.6114	6.04734	5.73311	6.38456	6.01833	3.56277	7.97561	5.49526	5.23997	4.71213	3.56674	3.78853	5.42949	7.06701	0.0822481
hsa-miR-124a	-4.39794	-4.8537	-3.77377	-3.93473	-3.99592	-4.0246	-4.47259	-4.58362	-6.48133	-4.83096	-3.84671	-3.55385	-0.0212181	-2.644	-4.19485	-4.79233	-4.51951	-4.42521	-2.76271	-4.6335	-4.62518	-4.6212	-4.27278	-4.48541	-4.39373	-4.28297	-4.03743	-4.32425	-4.44186	-4.1264	-4.58336	-4.20496	-4.07548	-4.3597	-4.17078	-4.97844	-3.97002	-4.65934	-3.04349	-4.37395	-4.97468	-2.07433	-4.15851	-4.14235	-4.21641	-4.48586	-4.95843	-4.27425	0.0856456
hsa-miR-199a	-4.39794	-4.8537	-3.77377	-3.93473	-3.99592	-4.0246	-4.47259	-4.58362	-6.48133	-1.63253	-3.84671	-3.55385	-4.04109	-2.644	-4.19485	-4.79233	-1.72645	-4.81036	-2.76271	-4.6335	-4.62518	-4.6212	-4.27278	-4.48541	-4.39373	-4.28297	-4.03743	-4.32425	-4.44186	-1.62566	-2.20805	-4.20496	-4.07548	-4.3597	-4.17078	-3.71201	-3.97002	-4.65934	-3.04349	-4.37395	-5.10946	-4.75214	-4.15851	-4.14235	-3.08371	5.24141	3.9432	-4.27425	0.0863612
hsa-miR-372	-4.39794	-4.78357	-3.77377	-3.93473	-3.99592	-4.0246	2.96496	-4.58362	3.75847	-4.83096	-3.84671	-3.55385	-4.04109	-2.644	-4.19485	-2.99391	-4.51951	-4.81036	-2.76271	-4.6335	-4.62518	-4.6212	-4.27278	-4.48541	-4.39373	-4.28297	-4.03743	-4.32425	-4.44186	-4.1264	-4.58336	-4.20496	-4.07548	-4.3597	-4.17078	-4.97844	-3.97002	-4.65934	-3.04349	-4.37395	-5.10946	-4.75214	-4.15851	-4.14235	-4.21641	-4.48586	-4.95843	-4.27425	0.0883197
hsa-miR-151	3.14483	3.86848	2.36832	4.12013	2.16086	2.51185	2.6345	3.02366	0.754931	1.92797	3.80684	2.68668	-3.87675	-2.3506	-3.00544	1.77626	2.80073	2.7579	-2.76271	3.39878	4.22991	3.25054	3.97824	3.1369	2.94593	2.17433	3.36409	2.31874	2.74306	3.72161	1.94202	2.06887	2.75136	3.05642	2.55846	2.25591	2.69227	3.39301	0.450175	2.97394	3.41683	2.27806	2.53065	3.05924	2.39242	2.50397	3.73291	2.36116	0.0885498
hsa-miR-98	-0.402857	0.281906	-2.17805	0.72783	-0.108854	0.303988	-1.34981	1.02193	3.75847	0.825438	0.548836	-3.55385	0.215841	-2.644	0.401601	-0.765	-4.36564	2.86715	-0.823014	0.528466	1.49498	0.842786	0.844895	1.15204	0.0674196	-1.70785	0.441842	-1.26941	0.353102	-4.1264	-0.0251304	-0.174943	1.07982	-0.31306	0.508274	1.23006	1.08327	1.2315	-2.19501	-1.79363	-0.627403	-2.43881	-0.685161	0.473757	-2.13616	0.251554	0.0569849	-1.1513	0.0897244
hsa-miR-302d	-4.39794	-4.8537	-3.77377	-3.93473	-3.99592	-4.0246	-4.47259	-4.58362	-6.48133	-4.83096	-3.84671	-3.55385	-4.04109	-2.644	-4.19485	-4.79233	2.97852	-3.64718	-2.76271	-4.6335	-4.62518	-4.6212	-4.27278	-4.48541	-4.39373	-4.28297	-4.03743	-4.32425	-4.44186	-4.1264	-4.58336	-4.20496	-4.07548	-4.3597	-4.17078	-4.97844	-3.97002	-4.65934	-3.04349	-4.37395	-5.10946	-4.75214	-4.15851	-4.14235	-4.21641	-4.48586	-4.95843	-4.27425	0.0900648
hsa-miR-342	1.78968	2.07626	-3.77377	-3.93473	3.2522	-3.74947	-4.47259	4.06333	3.75847	2.0152	1.89172	2.23167	3.328	4.48238	5.95439	-4.79233	2.11448	4.55426	2.52951	-3.01107	2.60599	1.69575	3.02116	3.34889	2.39244	2.30192	2.14874	1.80669	1.40753	2.60057	1.53956	1.32157	1.75163	2.60949	1.40486	2.08248	0.941671	3.02561	-0.672024	0.559763	3.48362	1.66773	2.48894	2.3802	-0.154511	2.59805	1.58721	-2.3018	0.0910685
hsa-miR-152	0.230658	-0.588735	-2.16396	-0.567671	2.89277	-1.51946	1.57832	0.940056	-3.35062	1.51669	-2.59785	-1.20601	-2.99173	-2.644	-1.14756	0.307967	-3.24526	-0.135075	1.761	-1.13179	0.659703	1.98595	1.5729	-3.31395	2.09149	0.508815	3.41286	1.25527	1.29985	-3.55413	-0.0424619	2.97541	-0.157953	2.26616	0.873184	1.76321	-1.5231	2.14774	-1.25653	2.95809	1.51729	2.06546	2.75532	2.49387	1.45425	3.71093	3.39912	-0.096763	0.0915898
hsa-miR-345	2.27605	2.66596	1.33097	0.366534	2.78012	1.52409	1.8284	3.66483	3.75847	1.92917	2.64932	1.01503	4.303	2.01882	3.2166	1.29966	2.57137	5.30219	1.15785	2.7632	2.65337	0.541346	1.14191	2.72708	1.80054	0.561887	1.48957	0.00819325	1.86829	0.905199	1.04517	1.11695	1.59768	1.49812	1.85052	1.68057	2.33695	2.68657	1.23826	0.130905	2.93361	2.03173	1.81765	1.83817	1.91716	1.12595	0.626348	0.484814	0.0917877
hsa-miR-371	-4.39794	-4.8537	-3.77377	-3.93473	-3.99592	-4.0246	-0.173372	-4.58362	3.75847	-4.83096	-3.84671	-3.55385	-4.04109	-2.644	-4.19485	-4.79233	-4.51951	-4.81036	-2.76271	-4.6335	-4.62518	-4.6212	-4.27278	-4.48541	-4.39373	-4.28297	-4.03743	-4.32425	-4.44186	-4.1264	-4.58336	-4.20496	-4.07548	-4.3597	-4.17078	-4.97844	-3.97002	-4.65934	-3.04349	-4.37395	-5.10946	-4.75214	-4.15851	-4.14235	-4.21641	-4.48586	-4.95843	-4.27425	0.0942765
hsa-miR-302a	-4.39794	-4.8537	-3.77377	-3.93473	-3.99592	-4.0246	-4.47259	-4.58362	-6.48133	-4.83096	-3.84671	-3.55385	-4.04109	-2.644	-4.19485	-4.79233	3.28257	-4.06656	-2.76271	-4.6335	-4.62518	-4.6212	-4.27278	-4.48541	-4.39373	-4.28297	-4.03743	-4.32425	-4.44186	-4.1264	-4.58336	-4.20496	-4.07548	-4.3597	-4.17078	-4.97844	-3.97002	-4.65934	-3.04349	-4.37395	-5.10946	-4.75214	-4.15851	-4.14235	-4.21641	-4.48586	-4.95843	-4.27425	0.0947184
hsa-miR-186	4.06724	3.1317	3.17236	4.06724	3.34251	2.48877	3.5861	2.61294	1.28065	3.67649	4.73735	5.34819	4.68847	2.92464	4.84246	3.18693	3.77075	3.92236	3.67834	3.23155	4.05661	2.98672	3.5487	5.04599	4.36527	2.04175	2.7017	2.96016	1.99368	3.72456	3.38633	2.89683	3.92782	4.87919	3.34875	3.53963	4.71102	3.80235	4.62724	2.83814	3.55399	3.70783	3.10334	4.08505	4.14236	4.35233	3.75842	3.74991	0.0947257
hsa-miR-126	-2.2736	1.88522	0.386861	-1.7137	0.35065	-1.88135	-3.09508	2.11299	-5.21624	0.918786	2.70407	6.83983	0.825733	-2.644	3.95483	0.156349	2.19059	2.13565	-2.76271	1.10671	2.50449	2.00535	2.62673	-3.85317	-0.982144	1.25072	0.71626	1.61689	0.958621	3.00058	4.26898	0.18114	-3.74276	-4.14608	1.95538	-0.783101	-0.225917	0.224814	-0.976956	2.23362	0.672548	0.885977	1.10567	0.38745	-0.277963	-1.27948	0.992337	-0.50959	0.0966568
hsa-miR-124b	-3.40639	-4.44757	-2.25855	-3.93473	-3.99592	-3.95524	-3.59675	-3.36672	-5.52378	-4.41642	-2.77296	-0.332491	0.8695	-2.54575	-1.49991	-3.30762	-3.8672	-3.4247	-2.71248	-4.11281	-3.12072	-3.95677	-4.0205	-4.42572	-3.03905	-4.28297	-3.57904	-4.32425	-4.05138	-4.1264	-4.58336	-3.77793	-2.10574	-4.29594	-4.08145	-3.34499	-3.77716	-3.58338	-3.04349	-2.62785	-3.09986	-1.73125	-4.15792	-3.46832	-4.21641	-3.96074	-4.04012	-4.27425	0.0972171
hsa-miR-130b	3.89971	3.96809	3.419	2.59718	3.36049	2.90529	4.0601	2.58405	1.86668	3.35453	3.61456	6.86478	3.46083	4.63443	5.35532	3.05603	3.31918	4.92786	3.58354	3.79962	3.17679	2.51331	3.82686	3.1624	2.71242	3.24275	3.93395	4.65282	3.86205	3.77642	3.32868	2.86645	2.91552	2.41847	4.14878	3.93287	2.81882	3.16681	1.57574	2.15342	5.42439	3.39046	3.19155	3.54484	3.2951	3.00934	4.37528	3.28164	0.0994523
hsa-miR-302c	-4.39794	-4.8537	-3.77377	-3.93473	-3.99592	-4.0246	-4.47259	-4.58362	-6.48133	-4.83096	-3.84671	-3.55385	-4.04109	-2.644	-4.19485	-4.79233	1.65532	-4.04766	-2.76271	-4.6335	-4.62518	-4.6212	-4.27278	-4.48541	-4.39373	-4.28297	-4.03743	-4.32425	-4.44186	-4.1264	-4.58336	-4.20496	-4.07548	-4.3597	-4.17078	-4.97844	-3.97002	-4.65934	-3.04349	-4.37395	-5.10946	-4.75214	-4.15851	-4.14235	-4.21641	-4.48586	-4.95843	-4.27425	0.100789
hsa-miR-373	-4.05934	-4.48632	-3.77377	-3.93473	-3.99592	-4.0246	2.81716	-4.58362	3.75847	-4.83096	-3.84671	-2.0093	-4.04109	-2.644	-4.19485	-3.72156	-4.51951	-4.07131	-2.76271	-4.57908	-4.62518	-2.64493	-4.27278	-3.83166	-4.39373	-1.86665	-4.03743	-4.32425	-4.44186	-4.1264	-4.58336	-4.20496	-4.07548	-4.3597	-4.17078	-4.85579	-3.97002	-4.14634	-3.04349	-4.37395	-5.10946	-4.75214	-2.86723	-4.14235	-4.21641	-4.48586	-4.95843	-4.27425	0.115731
hsa-miR-338	-4.39794	-4.8537	1.66724	1.55975	-2.95627	-4.0246	-0.903861	-3.20335	3.75847	-4.83096	-3.84671	-3.55385	-3.40813	-2.644	-2.00766	-1.91046	-2.73353	0.108902	-2.76271	-4.39619	-3.38419	-4.6212	-2.1993	-4.48541	-4.39373	-4.28297	-4.03743	-2.26248	-3.64372	-4.1264	-4.44674	-4.20496	-4.07548	-4.3597	-4.17078	-4.97844	0.806437	-4.65934	-3.04349	-4.37395	-2.4616	2.74058	-0.360706	-4.14235	-2.51084	-4.48586	-4.95843	-4.27425	0.116226
hsa-miR-148b	1.43732	1.25588	0.0998685	0.735317	2.71038	1.34858	1.24498	1.79192	-1.67159	1.63832	1.46763	1.0904	1.58381	0.529407	1.66179	1.16883	1.46538	1.21061	0.970641	0.803165	1.85256	1.1744	1.08282	1.14184	0.797109	-0.0426983	0.368746	-0.511158	-0.276641	0.441617	-1.08451	0.677004	0.0708252	0.00901127	0.214105	1.23478	0.90362	0.872347	-1.25243	-0.0223406	0.925804	0.152465	1.69196	0.00391862	1.01645	0.846779	0.760112	0.457039	0.116841
hsa-miR-128a	-4.39794	-4.8537	-3.77377	-3.93473	-3.99592	-4.0246	-4.47259	-4.58362	-6.48133	-4.83096	-3.84671	-3.55385	-4.04109	-0.868328	-1.43084	-4.79233	-4.51951	-4.77978	-2.76271	-4.6335	-4.62518	-4.6212	-4.27278	-4.48541	-4.39373	-4.28297	-4.03743	-4.32425	-4.44186	-4.1264	-4.58336	-4.20496	-4.07548	-4.3597	-4.17078	-4.64396	-3.97002	-4.59455	-3.04349	-4.37395	-5.10946	-4.75214	-4.15851	-4.14235	-4.21641	-4.48586	-4.95843	-4.27425	0.117074
hsa-miR-325	-0.120382	-2.71986	-3.77377	0.13899	-2.21765	-4.0246	-3.02674	-4.55123	3.75847	-4.83096	-3.84671	-3.55385	-2.20309	-2.644	-3.11881	-2.80624	-4.51951	-4.81036	-2.76271	-2.09982	-4.62518	-2.5471	-4.27278	-1.66991	-4.39373	-0.305397	-3.58973	-0.344252	-3.49574	-4.1264	-1.99396	-2.56375	-4.07548	-4.3597	-4.17078	-4.97844	-3.22219	-4.65934	-0.495093	-2.32619	-5.10946	-4.75214	-2.86621	-2.32934	-3.87914	-4.48586	-3.1976	-4.27425	0.121824
hsa-miR-133b	0.418276	-4.61046	-3.77377	-2.62545	-3.99592	-4.0246	-2.6117	-4.58362	-3.06259	-4.45134	-2.36253	-3.26699	-3.91932	-2.644	-2.53323	-0.946517	-4.32711	-2.66094	-2.76271	-3.96943	-2.29539	0.1203	-4.27278	-3.27869	-3.40127	0.148098	-3.53032	-2.89739	-3.69532	-4.1264	-0.550173	-2.61381	-2.32292	-4.3597	-3.24293	-0.672917	-3.80233	-3.99571	-3.04349	-0.155687	-3.47909	-0.764489	-0.733528	-1.10043	-2.93901	-3.52189	-3.27981	-3.27329	0.125078
hsa-miR-339	1.50302	2.49854	2.36813	2.57091	3.8005	2.06901	2.26732	3.80874	3.75847	2.19959	2.44164	3.58702	3.88673	-0.404943	2.04225	2.10294	2.3308	2.52227	2.77847	2.9929	3.34803	0.919591	1.72312	2.44344	2.9109	1.67072	3.02855	0.865087	1.66246	1.86879	2.33283	2.7314	1.35814	3.24637	1.8897	3.43299	2.63378	2.75489	2.11461	2.71549	2.42931	2.04766	2.04349	2.93489	1.6576	3.48505	1.9344	2.6533	0.128601
hsa-miR-142-5p	-4.39794	-4.8537	-2.80836	-3.93473	-3.99592	3.35227	-3.10903	-4.58362	-6.48133	-4.83096	-3.81492	4.73383	6.23783	5.43862	5.49559	2.83812	-4.51951	-4.81036	4.49631	-4.6335	-4.62518	-4.6212	-2.00289	-4.48541	-4.39373	-4.28297	-4.03743	-1.06041	-4.44186	-0.508499	-3.79757	-4.20496	-4.07548	-4.3597	-4.17078	-4.97844	-3.43619	-4.65934	-3.04349	-4.37395	-5.10946	-4.75214	-4.15851	-4.14235	-4.21641	-4.48586	-4.95843	0.217532	0.128663
hsa-miR-29c	3.7581	3.94976	3.87218	3.74288	4.26906	2.78505	5.53468	3.40748	1.89682	2.16571	3.4244	2.0242	5.32098	5.04713	4.88195	5.57234	2.35094	2.32592	5.08512	4.55908	2.57569	3.8099	3.37816	4.64915	2.39763	4.25631	5.16253	6.17908	4.11988	3.73671	2.37112	3.11846	4.79382	3.36027	4.51557	2.10054	4.6559	2.7827	4.17922	5.62911	4.95614	4.12169	2.38635	3.66412	5.33048	1.5963	4.85389	4.19478	0.130868
hsa-miR-191	3.51675	4.90185	4.3904	3.17659	5.77606	4.24405	5.15944	4.60025	2.49423	5.27315	4.94338	5.23539	5.86761	3.10458	5.68951	4.09835	4.43298	5.55959	3.42705	4.05014	4.9304	3.36921	3.63132	4.89001	4.87586	2.41734	4.93428	4.04569	4.3314	3.86627	4.23633	3.50543	2.75994	3.92652	3.81904	3.57082	4.1269	4.60435	3.15249	3.106	3.50085	3.27132	3.56675	3.25553	3.42397	4.30537	3.68844	4.39454	0.131597
hsa-miR-425	0.496469	0.823956	-2.99007	-0.669905	1.93529	0.13486	1.266	0.151958	3.75847	0.651654	-3.84671	-0.136479	1.04147	-2.644	1.27812	-0.58746	-0.825937	2.63943	-1.36421	-0.45883	0.555856	0.487816	-1.5807	0.905792	-0.101693	1.50448	0.95603	0.70747	-0.749245	-1.00345	-2.35317	-1.30877	-1.92505	-2.78994	-1.04223	-0.857044	-1.17396	0.612141	-2.19129	-1.09662	-0.500286	-1.79013	0.249611	-1.53919	-2.97503	-0.348938	-2.08876	-0.610387	0.134399
hsa-miR-182	3.05181	2.31117	2.90551	2.39961	2.89779	2.35431	2.90199	4.50099	1.00199	3.57843	4.21026	4.86731	-1.08409	1.75774	-0.135305	2.95078	3.98501	5.22206	1.66297	2.64883	4.2364	1.69658	3.0254	5.05564	1.95467	2.89686	2.242	3.59757	2.46637	1.97529	3.4185	2.58277	2.48773	4.10558	2.75634	4.09998	-0.0696009	4.13869	1.06408	4.12065	1.56135	0.661439	1.01878	2.16268	1.88553	0.346633	2.05562	2.84742	0.136796
hsa-miR-218	0.929454	0.490918	-3.77377	-3.93473	-3.99592	-3.47052	-4.47259	-1.61176	-6.48133	2.3119	-2.36113	0.724694	-4.04109	-2.644	-4.19485	-4.79233	-4.31216	-0.52705	-2.76271	-4.6335	-1.83321	-1.28528	-1.34765	1.55714	1.7974	-0.354212	-1.82275	-2.501	1.6462	-1.00082	0.735008	1.16774	-1.58544	0.0638315	-1.50175	-0.376972	-0.678466	-4.48474	-3.04349	-1.39031	0.961061	-0.86527	-3.05682	-2.20905	-0.97717	-1.704	-1.33016	-0.0806385	0.139073
hsa-let-7f	3.61866	4.48968	4.0154	3.8058	4.93796	4.43272	4.24028	6.32679	3.06899	5.39602	4.61679	1.39179	6.72489	4.02846	5.75087	3.84429	3.41113	5.45611	3.86063	5.26054	4.51993	5.19238	4.1443	6.36045	4.89932	4.713	5.88731	6.11092	5.12606	3.42012	5.05574	4.94807	5.48929	5.82665	5.41057	4.95325	5.20341	5.2455	3.91671	5.72713	4.38244	4.13237	4.03648	4.778	4.05155	5.24017	5.56056	3.63776	0.139447
hsa-miR-330	-3.6416	-3.4561	-3.77377	-3.22208	-3.557	-4.0246	-3.1828	-3.86987	3.75847	-3.91493	-1.8065	-3.16643	-4.04109	-2.644	-2.83233	-4.79233	-2.54326	-2.08497	-2.61871	-2.90947	-2.84586	-4.6212	-4.14466	-2.9937	-4.39373	-4.28297	-3.4379	-4.32425	-2.45611	-2.45077	-4.58336	-4.20496	-4.07548	-4.33021	-3.54528	-4.97844	-3.97002	-3.49458	-3.04349	-3.89816	-4.32392	-4.75214	-2.25377	-2.93049	-2.96642	-3.47085	-3.78586	-4.27425	0.139557
hsa-miR-30b	5.61091	5.49415	3.8619	4.84117	5.07615	4.12177	4.65853	5.12088	3.75847	4.94006	4.4831	4.86744	5.57873	-0.672179	5.43611	4.3672	6.3989	5.87741	3.60995	5.37397	5.72546	6.28632	5.4213	4.70886	5.31446	5.85514	4.73159	5.45725	4.70822	4.61325	5.50744	3.9559	6.22182	6.50805	5.79198	4.70906	4.9995	5.55975	5.08863	5.13341	4.44351	4.23638	5.34453	5.15526	4.98462	4.43015	4.59455	5.37724	0.13998
hsa-miR-214	-4.39794	-4.8537	-3.77377	-3.93473	-3.99592	-3.08353	-4.47259	-4.58362	-6.48133	0.426578	-3.84671	-3.55385	-4.04109	-2.644	-4.19485	-4.79233	0.59392	-4.07936	-2.76271	-4.6335	-4.62518	-4.6212	-4.27278	-4.44227	-4.19156	-4.28297	-4.03743	-4.32425	-4.44186	-4.1264	-2.5543	-4.20496	-4.07548	-4.3597	-4.17078	-1.05789	-1.61193	-4.65934	-3.04349	-4.37395	-5.10946	-4.75214	-4.15851	-4.14235	-0.604768	7.29029	5.54751	-4.27425	0.143252
hsa-miR-23a	3.68168	3.96637	1.71569	1.88759	2.87081	1.38657	3.83669	2.85628	0.548356	2.85906	2.36525	1.32484	3.64849	-1.78627	-0.567513	3.73719	1.39765	3.12406	3.23798	3.08458	3.14371	2.94346	3.64892	3.34678	4.30758	2.02535	3.48356	3.11563	3.01351	3.01624	2.76258	4.74773	2.98294	2.80687	3.13658	3.98875	3.14171	3.67566	1.96627	3.53301	3.92015	3.23985	2.51078	2.97776	3.3642	2.75737	4.89524	3.98711	0.145857
hsa-miR-136	-4.39794	-4.8537	-3.77377	-3.93473	-3.99592	-4.0246	-4.47259	-4.58362	-6.48133	-4.83096	-3.84671	-3.55385	-4.04109	-2.644	-4.19485	-4.79233	-4.51951	-4.81036	-2.76271	-4.6335	-4.62518	-4.6212	-4.27278	-4.48541	-4.39373	-4.28297	-4.03743	-4.32425	-4.44186	-4.1264	-4.58336	-4.20496	-4.07548	-4.3597	-4.17078	-2.09397	-3.97002	-4.65934	-3.04349	-4.37395	-5.10946	-4.75214	-4.15851	-4.14235	-4.21641	-4.48586	-4.95843	-4.27425	0.146541
hsa-miR-129	-4.39794	-4.44394	-3.77377	-3.93473	-3.99592	-4.0246	-4.47259	-4.58362	-6.48133	-4.83096	-3.84671	-3.55385	-2.6497	-2.644	-4.19485	-4.79233	-4.51951	-4.81036	-2.76271	-4.6335	-4.62518	-4.6212	-3.642	-4.48541	-4.39373	-4.28297	-4.03743	-4.32425	-4.44186	-2.08549	-4.58336	-4.20496	-4.07548	-4.3597	-4.17078	-4.97844	-3.97002	-4.65934	-3.04349	-4.37395	-5.10946	-4.75214	-4.15851	-4.14235	-4.09984	-4.48586	-4.87306	-4.27425	0.147454
hsa-miR-326	-4.31654	-3.93431	-3.77377	-3.93473	-3.78052	-4.0246	-4.13237	-4.58362	3.75847	-4.83096	-3.84671	-3.55385	-4.04109	-2.644	-4.19485	-4.79233	-3.86354	-3.69537	-2.76271	-4.28188	-3.89068	-4.6212	-4.27278	-4.48541	-4.39373	-4.28297	-4.03743	-4.32425	-4.44186	-4.1264	-4.58336	-4.20496	-4.07548	-4.3597	-4.17078	-4.97844	-3.97002	-4.65934	-3.04349	-4.37395	-5.10946	-4.75214	-4.15851	-4.14235	-4.21641	-4.48586	-4.95843	-4.27425	0.149923
hsa-miR-147	-4.39794	-4.8537	-3.77377	-3.93473	-3.99592	-4.0246	-4.47259	-4.58362	-6.48133	-4.83096	-3.84671	-3.55385	-4.04109	-2.644	-4.19485	-4.79233	-4.51951	-4.81036	-2.76271	-4.6335	-2.06759	-4.6212	-4.27278	-4.48541	-4.39373	-4.28297	-4.03743	-4.32425	-4.44186	-4.1264	-4.58336	-4.20496	-4.07548	-4.3597	-4.17078	-4.97844	-3.97002	-4.65934	-3.04349	-4.37395	-5.10946	-4.75214	-4.15851	-4.14235	-4.21641	-4.48586	-4.95843	-4.27425	0.154681
hsa-miR-30e	0.863958	1.21795	1.05759	-0.099032	0.13813	-0.76506	0.204656	1.22562	3.75847	1.47327	-0.658299	0.78416	2.35601	0.656952	0.828237	1.22075	3.49508	1.28485	-1.32909	-0.0619194	1.43283	1.29147	-0.180964	-0.234526	0.888319	0.701889	-0.238831	0.394037	0.503235	-1.45022	0.15553	-1.65031	0.476863	2.24429	0.298649	0.15872	-0.237634	0.831905	-2.97933	0.743119	-0.234923	0.0390989	-0.888004	-0.879729	1.5514	-1.02553	-0.0866896	1.3802	0.162894
hsa-miR-99b	3.35923	2.24943	0.554808	2.4166	2.29758	-2.53269	2.46652	3.02243	3.75847	2.59457	2.86957	1.69983	-0.607774	-2.644	-1.83435	-0.654959	2.03984	2.51912	-2.76271	2.66787	4.11516	2.68471	1.92878	2.28748	2.67601	0.966167	1.80218	0.668125	2.35952	-1.7031	2.84189	1.92267	1.16014	2.89417	2.69568	2.53147	1.56449	3.28258	-1.20748	2.3209	1.65844	2.06932	1.75214	2.6611	1.30042	2.69273	2.54865	2.43434	0.163209
hsa-miR-154	-4.39794	-4.8537	-3.77377	-3.93473	-3.99592	-4.0246	-4.47259	-4.58362	-6.48133	-4.83096	-3.84671	-3.55385	-4.04109	-2.644	-4.19485	-4.79233	-4.51951	-4.81036	-2.76271	-4.6335	-4.62518	-4.6212	-4.27278	-4.48541	-4.39373	-4.28297	-4.03743	-4.32425	-4.44186	-4.1264	-4.58336	-4.20496	-4.07548	-4.3597	-4.17078	-4.97844	-3.97002	-4.65934	-3.04349	-4.37395	-3.94566	-4.03207	-4.15851	-4.14235	-4.21641	-4.48586	-4.95843	-4.27425	0.164577
hsa-miR-1	-3.79351	-4.8537	-3.77377	-3.93473	-3.99592	-4.0246	-4.47259	-4.58362	-6.48133	-4.83096	-3.84671	-3.55385	-4.04109	-2.644	-4.19485	-4.27709	-4.51951	-4.81036	-2.76271	-4.6335	-3.87427	-4.6212	-4.27278	-4.48541	-4.39373	-4.28297	-4.03743	-4.32425	-4.44186	-4.1264	-3.73285	-4.20496	-4.07548	-4.3597	-4.17078	-4.97844	-3.97002	-4.65934	-3.04349	-4.17826	-5.10946	-2.84218	-4.15851	-4.1413	-4.21641	-4.48586	-4.95843	-4.27425	0.166677
hsa-miR-199-s	-3.58159	-3.07918	-3.77377	-3.09568	-2.12487	-2.67239	-2.52346	-4.58362	-4.3223	-0.439211	-3.84671	-1.76521	-1.70317	-1.36369	-3.3746	-3.44004	-0.342532	-4.16339	-2.76271	-2.87833	-4.62518	-2.98388	-4.27278	-2.21697	-4.39373	-2.09558	-4.03743	-4.32425	-4.44186	0.281931	-0.345588	-4.20496	-4.07548	-4.3597	-4.17078	-2.09408	-2.76205	-4.65934	-2.75668	-4.37395	-3.73894	-2.75097	-4.06341	-2.31669	-1.22452	6.56677	5.36731	-4.27425	0.167238
hsa-miR-138	-4.39794	-3.39668	-3.77377	-3.93473	-3.99592	-4.0246	-4.47259	-4.58362	-6.48133	-4.83096	-3.84671	-3.55385	-4.04109	-2.644	-4.19485	-4.63705	-4.51951	-4.81036	-2.03291	-4.6335	-4.62518	-4.6212	-4.27278	-4.48541	-4.39373	-4.28297	-4.03743	-4.32425	-4.03335	-4.1264	-4.58336	-4.20496	-4.07548	-4.3597	-3.00802	-4.97844	-3.97002	-3.48494	-3.04349	-4.37395	-3.03536	-3.72255	-4.15851	-3.86092	-3.81005	-4.48586	-4.95843	-4.27425	0.168384
hsa-miR-10b	-1.90477	-3.18507	1.74368	1.5759	-1.85365	0.609964	3.25067	-2.19057	2.53429	3.36547	0.752084	0.279726	-4.04109	-2.644	-1.56026	0.531023	5.78036	1.7667	-2.76271	1.72518	1.18646	3.72414	1.09682	1.29651	0.677906	3.09306	4.03202	-0.555185	1.35652	-0.603387	3.91657	2.74622	2.37217	-2.01618	-0.692992	3.68009	1.27772	3.80198	-0.949254	3.55471	2.77021	2.03797	2.62925	2.0916	3.06152	3.55933	-1.95828	-1.13517	0.168527
hsa-miR-368	-4.39794	-4.8537	-3.77377	-3.93473	-3.99592	-4.0246	-4.47259	-4.58362	3.75847	-4.83096	-3.84671	-3.55385	-4.04109	-2.644	-4.19485	-4.79233	-4.51951	-4.81036	-2.76271	-4.6335	-4.62518	-4.6212	-4.27278	-4.48541	-4.39373	-4.28297	-4.03743	-4.32425	-4.44186	-4.1264	-4.58336	-4.20496	-4.07548	-4.3597	-4.17078	-4.97844	-3.97002	-4.65934	-3.04349	-4.37395	-5.10946	-4.75214	-4.15851	-4.14235	-4.21641	-4.48586	-4.95843	-4.27425	0.174356
hsa-miR-380-3p	-4.39794	-4.8537	-3.77377	-3.93473	-3.99592	-4.0246	-4.47259	-4.58362	3.75847	-4.83096	-3.84671	-3.55385	-4.04109	-2.644	-4.19485	-4.79233	-4.51951	-4.81036	-2.76271	-4.6335	-4.62518	-4.6212	-4.27278	-4.48541	-4.39373	-4.28297	-4.03743	-4.32425	-4.44186	-4.1264	-4.58336	-4.20496	-4.07548	-4.3597	-4.17078	-4.97844	-3.97002	-4.65934	-3.04349	-4.37395	-5.10946	-4.75214	-4.15851	-4.14235	-4.21641	-4.48586	-4.95843	-4.27425	0.174356
hsa-miR-384	-4.39794	-4.8537	-3.77377	-3.93473	-3.99592	-4.0246	-4.47259	-4.58362	3.75847	-4.83096	-3.84671	-3.55385	-4.04109	-2.644	-4.19485	-4.79233	-4.51951	-4.81036	-2.76271	-4.6335	-4.62518	-4.6212	-4.27278	-4.48541	-4.39373	-4.28297	-4.03743	-4.32425	-4.44186	-4.1264	-4.58336	-4.20496	-4.07548	-4.3597	-4.17078	-4.97844	-3.97002	-4.65934	-3.04349	-4.37395	-5.10946	-4.75214	-4.15851	-4.14235	-4.21641	-4.48586	-4.95843	-4.27425	0.174356
hsa-miR-224	0.179446	2.72338	0.852618	4.00077	-3.99592	2.72508	-0.957727	-4.58362	-6.48133	0.386196	-1.08598	3.42208	-3.73036	-2.644	-4.19485	-1.78821	-4.51951	-4.81036	-2.76271	2.58268	-0.33077	2.14583	-4.27278	-3.692	2.36684	-4.28297	-4.03743	-4.32425	3.49175	-4.1264	-1.38072	1.86727	-4.07548	0.701004	1.41996	-1.28769	-3.97002	-4.65934	-1.35524	-4.37395	1.24153	-0.416745	-3.44826	1.48461	-4.21641	-4.48586	0.8475	2.49812	0.181887
hsa-miR-361	2.32606	2.30008	0.99673	1.97668	1.47862	1.83269	1.85857	1.5288	3.75847	2.79069	-3.84671	1.13249	3.19688	0.98545	3.337	2.69369	2.75653	3.35894	1.07978	1.62469	2.33179	1.96106	1.63871	2.7887	1.94462	2.02864	2.51617	1.27592	2.23056	1.94253	1.22592	2.21311	2.5078	1.71829	2.0758	4.04189	1.84298	2.71707	2.7595	1.40545	2.08305	1.61449	2.78618	1.51811	1.00206	2.46281	1.16488	2.03427	0.182654
hsa-miR-380-5p	-4.39794	-4.8537	-3.77377	-3.93473	-3.99592	-4.0246	-4.47259	-4.58362	3.75847	-4.83096	-3.84671	-3.55385	-4.04109	-2.644	-4.19485	-4.79233	-4.51951	-4.81036	-2.76271	-4.6335	-4.62518	-4.6212	-4.27278	-4.48541	-4.39373	-3.06843	-4.03743	-4.32425	-4.44186	-4.1264	-4.58336	-4.20496	-4.07548	-4.3597	-4.17078	-4.97844	-3.97002	-4.65934	-3.04349	-4.37395	-5.10946	-4.75214	-4.15851	-4.14235	-4.21641	-4.48586	-4.95843	-4.27425	0.185116
hsa-miR-377	-4.39794	-4.8537	-3.77377	-3.93473	-3.99592	-4.0246	-4.47259	-4.58362	3.75847	-4.83096	-3.84671	-3.55385	-4.04109	-2.644	-4.19485	-4.79233	-4.51951	-4.81036	-2.76271	-4.6335	-4.62518	-4.6212	-4.27278	-4.48541	-4.39373	-4.28297	-4.03743	-4.32425	-4.44186	-4.1264	-4.58336	-4.20496	-4.07548	-4.3597	-4.17078	-4.97844	-3.97002	-4.65934	-3.04349	-4.37395	-3.78919	-4.71231	-4.15851	-4.14235	-4.21641	-4.48586	-4.95843	-4.27425	0.186165
hsa-miR-181c	-1.21575	2.6048	-1.91082	-1.24505	-1.36649	-1.28761	-1.38714	0.809887	-1.88249	-1.75676	-3.18926	-3.55385	3.4079	2.37964	3.22219	1.00462	-3.52019	-0.769858	-1.06228	-0.376415	-2.05919	0.110113	-3.04382	-1.17837	-3.10622	-0.20129	-1.21488	-1.3299	-0.530688	-0.396672	-0.486349	-1.99062	-1.50845	-0.824954	-0.678606	-0.138768	-1.14727	0.407792	-0.972984	0.267794	0.661235	0.909456	-1.85861	-0.559096	-1.6534	-1.44875	1.98398	-0.532402	0.188101
hsa-miR-383	-4.39794	-4.8537	-3.77377	-3.93473	-3.99592	-4.0246	-4.47259	-4.58362	3.75847	-4.83096	-3.84671	-3.55385	-4.04109	-2.644	-4.19485	-4.79233	-4.51951	-4.81036	-2.76271	-4.6335	-4.62518	-4.6212	-4.27278	-4.48541	-4.39373	-4.28297	-4.03743	-4.32425	-4.44186	-4.1264	-4.58336	-2.56713	-4.07548	-4.3597	-4.17078	-4.97844	-3.97002	-4.65934	-3.04349	-4.37395	-5.10946	-4.75214	-4.15851	-4.14235	-4.21641	-4.48586	-4.95843	-4.27425	0.189091
hsa-miR-381	-4.39794	-4.8537	-3.77377	-3.93473	-3.99592	-4.0246	-4.47259	-4.58362	3.75847	-4.83096	-3.84671	-3.55385	-4.04109	-2.644	-4.19485	-4.79233	-4.51951	-4.81036	-2.76271	-4.6335	-4.62518	-4.6212	-4.27278	-4.48541	-4.39373	-4.28297	-4.03743	-4.32425	-4.44186	-4.1264	-4.58336	-4.20496	-4.07548	-4.3597	-4.17078	-4.97844	-3.97002	-4.65934	-3.04349	-4.37395	-3.86958	-4.07163	-4.15851	-4.14235	-4.21641	-4.48586	-4.95843	-4.27425	0.191188
hsa-miR-422a	-2.01981	-4.8537	-3.72782	-3.93473	-3.99592	-4.0246	-2.53882	-2.60342	3.75847	-2.22273	-3.84671	-0.638157	-0.225265	-2.644	-2.32988	-3.82812	-1.09944	-3.51504	-2.76271	-3.73765	-4.62518	-4.6212	-4.24456	-1.70292	-3.86871	-4.28297	-3.0705	-2.15928	-4.44186	-3.06164	-4.58336	-4.20496	-1.42348	-4.19764	-4.17078	-4.97844	-3.0761	-4.65934	-1.62608	-3.52813	-4.90409	-4.75214	-2.65531	-4.14235	-2.89757	-4.48586	-4.03307	-4.27425	0.19229
hsa-miR-33	-4.39794	-4.8537	-2.7819	-3.93473	-3.8048	-2.32108	-1.94217	-2.93968	3.75847	-4.83096	-3.47167	-3.55385	-2.71273	-2.644	-2.80246	-3.39947	-1.97706	-3.33461	-2.76271	-3.35428	-3.21285	-4.6212	-4.04344	-3.37532	-3.74844	-4.28297	-3.16268	-3.11033	-4.44186	-4.1264	-4.58336	-4.20496	-4.05033	-4.3597	-3.61349	-2.38468	-1.1945	-4.65934	-3.04349	-4.37395	-3.29264	-3.11477	-4.15851	-4.14235	-2.7137	-3.83014	-3.97068	-4.27425	0.192854
hsa-miR-337	-4.39794	-4.8537	-3.77377	-3.93473	-3.99592	-4.0246	-4.47259	-4.58362	3.75847	-4.83096	-3.84671	-3.55385	-4.04109	-2.644	-4.19485	-4.79233	-4.51951	-4.81036	-2.76271	-4.6335	-4.62518	-4.6212	-4.27278	-4.48541	-4.39373	-4.28297	-4.03743	-4.32425	-4.44186	-4.1264	-4.58336	-4.20496	-4.07548	-4.3597	-4.17078	-4.97844	-3.97002	-4.65934	-3.04349	-4.37395	-4.78904	-4.17638	-4.15851	-4.14235	-4.21641	-4.48586	-3.47493	-4.27425	0.19543
hsa-miR-216	-4.39794	-4.8537	-3.77377	-3.93473	-3.99592	-4.0246	-4.47259	-4.58362	-6.48133	-4.83096	-3.84671	-3.55385	-4.04109	-2.644	-4.19485	-4.79233	-4.51951	-4.81036	-2.76271	-4.6335	-4.62518	-4.6212	-4.27278	-4.48541	-4.39373	-4.28297	-4.03743	-4.32425	-3.72089	-4.1264	-4.58336	-4.20496	-4.07548	-4.3597	-4.17078	-4.97844	-3.97002	-4.65934	-3.04349	-4.37395	-5.10946	-4.75214	-4.15851	-4.14235	-4.21641	-4.48586	-4.95843	-4.27425	0.197001
hsa-miR-104	-4.39794	-4.8537	-3.77377	-3.93473	-3.99592	-4.0246	-4.47259	-4.58362	-6.48133	-4.83096	-3.84671	-3.55385	-4.04109	-2.644	-4.19485	-4.79233	-4.51951	-4.81036	-2.76271	-4.6335	-4.62518	-4.18288	-4.27278	-4.48541	-4.39373	-4.28297	-4.03743	-4.32425	-4.44186	-4.1264	-4.58336	-4.20496	-4.07548	-4.3597	-4.17078	-4.97844	-3.97002	-4.65934	-3.04349	-4.37395	-5.10946	-4.75214	-4.15851	-4.14235	-4.21641	-4.48586	-4.95843	-4.27425	0.204655
hsa-miR-193	0.485937	2.15941	1.66826	-2.20198	2.12551	-4.0246	-0.920154	1.09732	-3.66806	-1.34271	-1.84614	-2.53353	-1.54509	-1.54242	-3.29848	-4.25262	0.154702	-0.62963	-2.76271	-1.22989	0.458406	1.33406	1.28645	0.0857965	1.75504	-1.35814	1.47726	1.48847	1.82285	2.12146	-2.70037	0.0840146	0.0462077	0.454034	-0.962762	-1.60422	-0.435046	1.93501	1.09596	1.97756	1.3931	-0.522658	0.895649	1.61504	0.409305	2.08005	0.859353	1.70978	0.205743
hsa-miR-219	-4.39794	-4.8537	-3.77377	-3.93473	-3.99592	-4.0246	-4.47259	-4.55778	-6.48133	-4.83096	-3.84671	-3.55385	-4.04109	-2.644	-4.19485	-4.68282	-4.51951	-4.45022	-2.76271	-4.6335	-4.62518	-4.6212	-4.27278	-4.48541	-4.39373	-4.28297	-4.03743	-4.32425	-4.44186	-4.1264	-4.58336	-4.20496	-4.07548	-4.3597	-4.17078	-4.97844	-3.97002	-4.65934	-3.04349	-4.37395	-5.10946	-4.75214	-4.15851	-4.14235	-4.21641	-4.48586	-4.95843	-4.27425	0.205889
hsa-miR-122a	-4.39794	-4.8537	-3.77377	-3.93473	-3.99592	-4.0246	-4.47259	-4.58362	-6.48133	-4.83096	-3.84671	-3.55385	-4.04109	-2.644	-4.19485	-4.79233	-4.51951	-4.81036	-2.76271	-4.6335	-4.62518	-4.6212	-4.27278	-4.48541	-4.39373	-4.28297	-4.03743	-4.32425	-4.44186	-4.1264	-4.58336	-4.20496	-4.07548	-4.3597	-4.17078	-4.97844	-3.97002	-4.65934	-3.04349	-4.37395	-5.10946	-4.75214	-4.15851	-4.14235	-4.21641	-4.48586	-4.95843	-4.27425	0.217816
hsa-miR-144	-4.39794	-4.8537	-3.77377	-3.93473	-3.99592	-4.0246	-4.47259	-4.58362	-6.48133	-4.83096	-3.84671	-3.55385	-4.04109	-2.644	-4.19485	-4.79233	-4.51951	-4.81036	-2.76271	-4.6335	-4.62518	-4.6212	-4.27278	-4.48541	-4.39373	-4.28297	-4.03743	-4.32425	-4.44186	-4.1264	-4.58336	-4.20496	-4.07548	-4.3597	-4.17078	-4.97844	-3.97002	-4.65934	-3.04349	-4.37395	-5.10946	-4.75214	-4.15851	-4.14235	-4.21641	-4.48586	-4.95843	-4.27425	0.217816
hsa-miR-198	-4.39794	-4.8537	-3.77377	-3.93473	-3.99592	-4.0246	-4.47259	-4.58362	-6.48133	-4.83096	-3.84671	-3.55385	-4.04109	-2.644	-4.19485	-4.79233	-4.51951	-4.81036	-2.76271	-4.6335	-4.62518	-4.6212	-4.27278	-4.48541	-4.39373	-4.28297	-4.03743	-4.32425	-4.44186	-4.1264	-4.58336	-4.20496	-4.07548	-4.3597	-4.17078	-4.97844	-3.97002	-4.65934	-3.04349	-4.37395	-5.10946	-4.75214	-4.15851	-4.14235	-4.21641	-4.48586	-4.95843	-4.27425	0.217816
hsa-miR-208	-4.39794	-4.8537	-3.77377	-3.93473	-3.99592	-4.0246	-4.47259	-4.58362	-6.48133	-4.83096	-3.84671	-3.55385	-4.04109	-2.644	-4.19485	-4.79233	-4.51951	-4.81036	-2.76271	-4.6335	-4.62518	-4.6212	-4.27278	-4.48541	-4.39373	-4.28297	-4.03743	-4.32425	-4.44186	-4.1264	-4.58336	-4.20496	-4.07548	-4.3597	-4.17078	-4.97844	-3.97002	-4.65934	-3.04349	-4.37395	-5.10946	-4.75214	-4.15851	-4.14235	-4.21641	-4.48586	-4.95843	-4.27425	0.217816
hsa-miR-217	-4.39794	-4.8537	-3.77377	-3.93473	-3.99592	-4.0246	-4.47259	-4.58362	-6.48133	-4.83096	-3.84671	-3.55385	-4.04109	-2.644	-4.19485	-4.79233	-4.51951	-4.81036	-2.76271	-4.6335	-4.62518	-4.6212	-4.27278	-4.48541	-4.39373	-4.28297	-4.03743	-4.32425	-4.44186	-4.1264	-4.58336	-4.20496	-4.07548	-4.3597	-4.17078	-4.97844	-3.97002	-4.65934	-3.04349	-4.37395	-5.10946	-4.75214	-4.15851	-4.14235	-4.21641	-4.48586	-4.95843	-4.27425	0.217816
hsa-miR-220	-4.39794	-4.8537	-3.77377	-3.93473	-3.99592	-4.0246	-4.47259	-4.58362	-6.48133	-4.83096	-3.84671	-3.55385	-4.04109	-2.644	-4.19485	-4.79233	-4.51951	-4.81036	-2.76271	-4.6335	-4.62518	-4.6212	-4.27278	-4.48541	-4.39373	-4.28297	-4.03743	-4.32425	-4.44186	-4.1264	-4.58336	-4.20496	-4.07548	-4.3597	-4.17078	-4.97844	-3.97002	-4.65934	-3.04349	-4.37395	-5.10946	-4.75214	-4.15851	-4.14235	-4.21641	-4.48586	-4.95843	-4.27425	0.217816
hsa-miR-369	-4.39794	-4.8537	-3.77377	-3.93473	-3.99592	-4.0246	-4.47259	-4.58362	3.75847	-4.83096	-3.84671	-3.55385	-4.04109	-2.644	-4.19485	-4.79233	-4.51951	-4.81036	-2.76271	-4.6335	-4.62518	-4.6212	-4.27278	-4.48541	-4.39373	-4.28297	-4.03743	-4.32425	-4.44186	-4.1264	-4.58336	-4.20496	-4.07548	-4.3597	-4.17078	-4.97844	-3.97002	-4.65934	-3.04349	-4.37395	-2.25012	-2.95106	-4.15851	-4.14235	-4.21641	-4.48586	-4.71882	-4.27425	0.220308
hsa-miR-189	-4.39794	-4.8537	-3.77377	-3.93473	-3.99592	-4.0246	-4.47259	-4.58362	-6.48133	-4.4645	-3.84671	-3.55385	-4.04109	-2.644	-4.19485	-4.79233	-3.77001	-4.81036	-2.76271	-4.6335	-4.62518	-4.6212	-4.27278	-4.48541	-4.39373	-4.28297	-4.03743	-4.32425	-4.44186	-4.1264	-4.58336	-4.20496	-4.07548	-4.3597	-4.17078	-4.87078	-3.97002	-4.65934	-3.04349	-4.37395	-5.10946	-4.63957	-4.15851	-4.14235	-4.21641	-4.48586	-4.95843	-4.27425	0.223431
hsa-let-7i	2.81729	4.91052	2.72139	4.12723	2.95809	1.92814	2.48529	4.0298	-0.393994	3.73663	3.20339	-3.55385	3.56308	2.17838	3.03456	1.76254	-0.0753742	3.57095	2.74767	5.6774	3.50056	4.73502	2.97767	4.76863	4.68815	4.31157	4.48488	2.74212	4.08984	2.71796	1.49972	3.81528	4.21736	3.33118	3.47983	3.6445	3.60911	4.00347	3.84855	4.72421	3.5268	3.547	2.45775	3.59915	4.70141	4.65178	4.73104	2.40323	0.223477
hsa-miR-23b	3.66013	5.52046	1.502	2.88339	5.02062	5.04553	3.5493	4.4275	2.69169	5.21322	2.20118	2.17216	1.99545	0.298981	1.09184	4.97104	7.34252	2.53428	1.82867	4.27526	2.86725	4.885	0.934817	3.30498	4.26393	2.54707	3.21798	1.60825	3.86299	1.93698	4.1691	4.51434	2.36462	5.03681	4.17781	5.56773	2.05759	4.62871	2.09406	4.18357	3.5374	5.45143	3.62181	2.91992	2.61361	4.74004	5.25516	3.69882	0.224036
hsa-miR-143	-0.84183	-4.8537	-3.77377	-3.93473	-3.99592	-4.0246	-4.47259	-4.58362	-6.48133	-4.83096	-3.84671	-3.55385	-4.04109	-2.644	-4.19485	-4.79233	-4.51951	-4.81036	-2.76271	-4.6335	-4.62518	-4.6212	-4.27278	-4.48541	-4.39373	-4.28297	-4.03743	-4.32425	-4.44186	-4.1264	-2.71839	-4.20496	-4.07548	-4.3597	-4.17078	-4.97844	-3.97002	-4.65934	-3.04349	-4.37395	-4.70561	-1.00751	-4.15851	-3.73757	-4.21641	0.506072	0.703977	-4.27425	0.2356
hsa-miR-103	4.45878	5.27776	2.80214	4.0213	4.8615	4.56599	4.2306	4.89687	0.578558	4.22854	4.08247	3.3883	3.90708	3.14638	4.96182	4.14657	4.29466	5.19726	3.58382	4.38179	4.36099	3.02403	4.48624	3.74663	3.71257	2.53695	2.76831	2.81117	3.95669	4.3788	2.38038	2.59986	3.53987	3.63504	3.79106	4.2601	4.62608	4.20034	1.94484	2.20441	4.4461	3.27081	4.10188	4.25328	4.48151	4.49474	3.08471	2.73427	0.240051
hsa-miR-27b	4.20961	5.49712	1.63275	3.12813	5.63871	5.97472	3.77605	4.69478	2.14441	5.3028	2.21101	1.75972	1.9482	0.434776	1.15332	4.93344	7.12798	2.90305	2.62103	4.71117	2.41271	5.4793	0.592331	3.15933	4.63346	3.96545	3.7875	1.35767	4.24365	1.73496	4.35193	5.55565	2.36545	5.05485	4.83409	6.01793	2.54301	5.25678	2.70313	3.57813	4.25714	5.59314	4.31192	3.09206	2.08403	5.06072	4.94063	4.11257	0.245528
hsa-miR-188	-0.108911	-0.586033	-0.647952	-0.170404	0.00301082	0.143332	-0.99578	-2.00963	-1.34098	-1.85195	-0.504117	-0.771141	-1.39921	-1.11492	-0.87096	-0.967173	-0.541014	0.973303	-0.736782	-1.13815	-0.0238458	2.16694	-1.75185	0.0997803	-0.893947	4.52775	0.102184	-1.69622	-0.886753	-1.19825	0.559333	-1.62958	1.4278	-3.04512	-2.00133	-0.951553	0.384232	-1.51314	1.49383	-1.43274	-0.485871	-0.778014	2.51157	-1.2029	0.807119	-0.670796	-3.26918	-2.61672	0.247815
hsa-miR-26a	5.88507	7.0317	5.07896	6.03915	7.6083	5.23772	6.86012	7.7858	4.6612	7.57872	6.44024	6.85163	7.30736	5.08977	7.12751	6.38938	7.57871	6.4695	4.30429	6.93559	6.88653	7.1964	6.54181	6.49322	6.87741	7.44619	6.93572	7.80986	6.45242	7.06467	7.33628	6.73736	6.1113	7.03887	7.235	5.89043	6.55245	6.1313	5.93615	6.0986	6.35394	5.53399	6.40757	5.9156	6.78701	6.83551	6.86452	7.13651	0.260484
hsa-miR-331	1.07519	2.5528	1.25785	2.16287	3.37992	1.26195	2.25949	2.63765	3.75847	2.05618	2.94808	1.54669	2.63784	1.39667	3.05332	1.40918	2.93839	3.09257	1.22321	2.83181	3.29814	2.67841	2.64904	4.02903	1.89629	2.28309	2.4396	1.60216	1.29241	3.07275	1.52268	1.04819	0.751361	3.49728	2.25687	1.99717	1.54355	2.53806	1.11441	1.61624	2.36812	1.27925	1.84709	2.43787	1.78122	2.19824	1.06295	1.98168	0.262825
hsa-miR-19a	5.92178	6.04002	8.10543	6.89476	4.82251	8.8629	7.42393	4.94572	4.49321	6.00849	6.97816	10.6463	8.2161	7.94673	8.55668	8.32128	5.87171	6.74051	7.29934	6.92796	6.18811	5.94904	6.76234	8.11788	6.27749	6.26262	6.17034	7.19364	6.43291	7.71962	5.75603	5.30628	7.01138	6.5811	6.70337	6.16925	6.47791	5.45847	4.50149	5.34483	6.74121	6.42995	6.43169	6.15402	6.23549	5.97387	6.24262	6.755	0.267795
hsa-miR-145	3.14674	-4.8537	-3.77377	-3.93473	-3.99592	-4.0246	-4.47259	-4.58362	-6.48133	-2.38038	0.408847	0.0809054	-2.05166	-2.644	-3.77628	-4.56902	-1.08051	-4.59021	-0.058022	-4.6335	-4.62518	-4.45031	-4.27278	-4.48541	-3.30975	-4.28297	-3.51752	-4.32425	-3.42267	-4.1264	-1.84217	-3.94483	-4.07548	-4.3597	-4.17078	-3.33198	-0.867364	-4.65934	-3.04349	-4.37395	-2.4497	1.95101	-0.273418	0.479337	-3.53334	4.20599	5.53392	-3.41643	0.269478
hsa-let-7g	4.30566	4.33182	5.31816	3.75764	4.42842	4.98269	5.42403	4.49894	3.97108	5.98707	4.97892	0.566389	7.03763	4.77484	5.93336	4.51829	2.55949	5.25007	4.24403	5.49614	4.72968	5.00922	4.93955	6.4923	5.49695	4.86898	5.84133	5.7462	5.2226	3.3061	4.85253	4.93149	5.77435	5.27336	5.52612	4.94866	4.71394	5.7545	4.37802	4.7792	4.75565	4.41466	3.9913	4.49851	4.52564	4.74949	6.31681	4.86046	0.271102
hsa-miR-19b	6.64803	7.0728	8.3993	7.39976	5.70262	9.08174	7.99862	5.76543	5.48267	6.66899	7.24656	10.7949	8.95045	8.48823	8.96955	9.09942	6.33501	7.25993	7.72061	7.47927	6.47972	6.5707	7.81682	8.52643	7.1697	6.95835	6.7777	7.51399	6.94557	8.38634	6.47081	6.32971	7.81002	7.43034	7.12294	6.632	6.83891	6.13486	5.85715	5.96124	6.93881	6.98706	6.86711	6.88201	6.58077	6.6148	6.43135	7.27379	0.272759
hsa-miR-184	-4.39794	-1.82866	-3.77377	-3.93473	-1.52799	-4.0246	-4.47259	-3.00086	-6.48133	-4.83096	-3.84671	-3.55385	-4.04109	-2.644	-3.64003	-4.79233	-4.51951	-4.81036	-2.76271	-4.6335	-4.62518	-4.6212	-3.22661	-4.48541	-4.39373	-4.28297	-4.03743	-1.26891	-4.44186	-4.1264	-4.58336	-4.20496	-4.07548	-4.3597	-4.17078	-4.97844	-2.6445	-4.65934	-3.04349	-4.37395	-5.10946	-4.75214	-4.15851	-4.14235	-3.59742	-4.48586	-4.95843	-4.27425	0.276362
hsa-miR-29b	2.37764	1.74994	3.0902	3.22407	0.969156	2.18593	3.83117	0.0937233	-1.86769	0.0454883	3.95035	0.141245	0.881978	-0.444594	0.465197	3.69729	-0.0689947	1.74585	1.91584	2.94445	1.94852	1.27335	3.89889	2.4325	1.71558	3.17211	2.8994	3.63115	2.3025	3.40102	0.69711	2.34103	3.82381	2.44634	3.35764	1.69154	3.57521	2.00208	2.73979	2.15292	3.82063	1.22465	1.73152	1.38584	4.18788	-0.379297	0.484133	3.82962	0.281028
hsa-miR-367	-4.39794	-4.8537	-3.77377	-3.93473	-3.99592	-4.0246	-4.47259	-4.58362	3.75847	-4.83096	-3.84671	-3.55385	-4.04109	-2.644	-4.19485	-4.79233	4.35334	-3.58211	-2.76271	-4.6335	-4.62518	-4.6212	-4.27278	-4.48541	-4.39373	-4.28297	-4.03743	-4.32425	-4.44186	-4.1264	-4.58336	-4.20496	-4.07548	-4.3597	-4.17078	-4.97844	-3.97002	-4.65934	-3.04349	-4.37395	-5.10946	-4.75214	-4.15851	-4.14235	-4.21641	-4.48586	-4.95843	-4.27425	0.283811
hsa-miR-296	3.1677	-4.8537	0.811252	-3.93473	2.81569	1.55407	-2.98047	3.10241	-2.411	-4.37991	-2.78629	0.77524	-3.79851	-1.09721	-3.23434	-3.88632	-2.7504	-0.847246	-0.098599	-1.10274	3.4342	2.29778	-3.12874	-3.16562	-4.39373	-4.28297	2.2282	-4.15211	0.445957	-2.30796	-2.15958	-0.158466	2.61416	2.63527	-3.21044	-0.272684	2.99305	2.00377	-0.0465621	2.24434	2.10135	0.810465	2.54216	2.5172	2.51435	0.823635	2.31125	-1.81443	0.284644
hsa-miR-346	-2.83563	-3.52358	-3.51753	-3.15905	-3.38375	-4.0246	-3.92622	-3.40278	3.75847	-3.50993	-2.23643	-2.87959	-2.66061	-2.644	-3.93404	-2.93195	-1.47728	-3.93843	-2.76271	-3.54411	-2.27164	-1.79168	-4.27278	-2.61991	-3.41182	-0.799272	-3.47768	-1.58594	-4.2736	-3.79005	-1.99086	-3.25864	-1.58257	-4.14992	-4.17078	-3.50313	-2.6936	-3.6286	-3.04349	-2.34423	-2.8688	-3.8921	-2.05756	-4.14235	-3.61811	-3.84092	-4.20916	-4.27425	0.291703
hsa-miR-340	-1.7123	-2.3374	-3.77377	-3.04813	-1.36762	-2.86693	-3.72808	-1.30473	3.75847	-1.39455	-1.28594	-1.89771	-1.40748	-2.644	-4.19485	-3.21971	-1.52905	0.436519	-2.76271	-1.52353	-1.18817	-2.64513	-0.77087	-2.97876	-1.59805	-3.07068	-2.6012	-1.45548	-2.86289	-1.80981	-1.56532	-4.20496	-0.242891	-2.22306	-2.07905	-2.05888	-0.819139	-1.92236	-0.162298	-3.64831	-1.57262	-2.5143	-0.915897	-2.32227	-1.63054	-2.40747	-3.22293	-4.27425	0.292987
hsa-miR-20N	3.63763	4.38191	6.58941	5.1129	3.50997	8.02658	5.46462	3.99525	4.2462	4.57495	5.66781	9.60653	7.81931	6.78001	7.10094	6.54968	5.2688	5.10423	5.39559	5.86131	4.4483	4.47765	5.79579	6.50809	4.93655	4.92438	4.26903	6.4591	4.85221	6.72093	4.24188	4.18168	4.96517	5.86407	5.3726	4.12089	5.00954	4.10449	2.94112	4.32407	4.79098	4.64427	4.46763	4.39036	5.0047	3.97783	4.84571	5.02268	0.293283
hsa-miR-301	1.85636	3.92135	1.01672	3.26447	4.83328	1.74433	3.20017	4.85625	-1.75575	3.42736	3.31436	2.5356	1.36063	2.33924	3.81601	0.927801	3.7234	5.61674	2.22702	2.91388	3.31973	2.94643	4.41486	2.92269	1.88737	1.81693	1.58341	2.77581	2.35327	3.52222	2.0707	0.627114	1.2496	2.58306	2.2934	1.75433	2.59711	2.90208	1.47953	0.639178	3.85208	0.244864	3.34574	1.90311	1.73726	2.62529	1.10835	1.3817	0.294423
hsa-miR-16	6.85725	7.43863	7.29353	6.42409	8.16185	8.09219	7.46724	7.31139	5.17232	7.6458	7.13538	7.94415	8.71288	7.80214	9.25834	6.53792	7.19413	6.66233	6.75256	7.8031	7.49591	6.27238	6.83476	7.017	7.97895	6.31406	7.84796	7.01323	7.13755	7.19807	7.64867	7.47876	7.56181	7.36842	7.75881	8.0887	7.33045	7.33027	4.84031	6.80008	7.50912	7.00694	6.29188	7.40046	7.37888	8.03687	7.97314	7.86977	0.294439
hsa-miR-17-5p	4.03733	3.96	4.5227	3.51384	2.8167	6.05198	4.76785	2.21718	2.38275	3.32194	4.32967	7.43204	5.41078	4.98105	5.52935	5.30003	3.62348	4.76985	4.52196	4.74699	3.20548	3.72772	5.03738	4.80538	4.45334	3.16362	3.84915	4.1928	3.68202	4.93029	2.51403	2.46393	4.73723	4.16299	3.92806	3.30948	3.96741	3.44938	2.73777	3.06269	3.34128	3.78115	3.78046	3.44053	2.96548	3.77073	2.66018	3.13545	0.298698
hsa-miR-15a	3.45925	4.58487	4.83148	3.88167	5.18338	5.50689	4.46398	4.40659	1.54457	3.95619	2.82024	4.37495	6.59877	4.84784	6.49	4.07166	3.94799	3.18988	3.52899	4.42281	4.12816	3.14138	4.07723	3.83989	5.03407	2.94668	4.22253	3.96426	4.08699	4.68368	4.50776	4.84146	4.2075	4.60853	4.87905	5.17313	3.85488	4.2004	2.38959	3.53332	4.79907	3.198	3.2959	4.67731	3.88421	5.42878	3.9353	4.52458	0.298714
hsa-miR-422b	1.64507	-1.37165	1.74402	-0.603792	-1.42551	-0.399769	0.909272	0.405313	3.75847	2.45886	-3.84671	4.04319	3.76385	1.57328	1.50536	0.0957482	1.9272	1.44572	1.30868	-0.223451	-0.155966	-1.4651	1.64519	2.83378	1.23096	-0.0012466	-0.203967	1.31618	-1.23997	1.65315	-1.52679	0.835147	3.05211	0.628807	-0.329282	-2.12363	1.24009	-0.670319	1.91248	0.150025	-0.450578	-1.29751	1.98166	-0.0646716	1.62219	-0.919944	-0.514132	0.113693	0.299425
hsa-miR-324-3p	1.76142	2.6704	1.67362	1.49507	2.39804	2.44209	2.68123	1.79219	3.75847	1.53871	2.55057	2.03741	1.20088	1.07625	2.75935	2.0253	2.35646	3.04052	1.50347	2.50284	2.69097	1.48755	2.48278	2.50171	3.25989	1.79028	2.54311	1.98278	1.45509	2.58558	1.50247	1.73518	2.38559	1.67699	2.50501	2.12177	1.69564	2.75989	3.46672	1.32266	3.17605	1.33709	2.4837	1.48918	2.84332	2.35769	1.38669	1.21413	0.301517
hsa-miR-374	0.90933	1.29982	1.73728	1.28746	0.85783	1.85564	0.985475	0.673309	3.75847	2.19865	1.92082	2.70888	2.34213	0.506949	2.01399	1.9018	2.22239	3.01877	0.627203	1.3247	2.53544	1.77666	1.51063	2.37475	0.503741	0.743376	2.00955	1.66369	2.03294	1.80361	2.55188	1.59977	1.5214	1.21127	1.85159	2.05909	2.12833	2.66086	1.83054	1.136	1.76503	1.39725	1.44046	1.1112	1.67591	1.67327	1.39807	1.71049	0.3024
hsa-miR-195	2.30478	4.44822	4.28963	2.00292	4.36765	4.95457	3.98348	4.45639	1.37045	3.14938	1.21223	4.11931	4.93086	4.26366	4.49598	2.73752	3.34745	2.2235	1.06368	3.83318	2.39051	1.33138	1.90129	3.02626	5.10363	1.79128	4.54453	2.63885	3.46994	3.01765	2.9732	1.38245	3.04861	2.60782	2.6372	3.49246	0.731754	3.21544	2.34345	4.05147	4.8441	4.13476	0.735564	3.55007	2.99951	2.99071	5.93109	2.08034	0.304202
hsa-miR-328	-1.67146	1.47685	-2.49541	-1.33214	2.41383	-2.39563	0.499518	0.244951	3.75847	0.968858	-0.472265	-0.193935	-0.421632	-1.68846	-0.227689	0.318962	0.584878	1.98241	-0.101049	0.6194	2.58852	0.423738	-0.570811	0.391268	-0.944619	1.33362	0.701928	-0.146372	0.946155	-0.504325	0.978134	1.403	-0.285367	0.673934	-0.132375	0.56856	-0.384126	2.04766	-0.403839	0.474976	0.0301993	-0.446721	1.20847	0.785663	-0.126464	0.688445	0.863575	1.8113	0.313264
hsa-miR-423	2.38396	3.61592	2.80632	3.06906	4.1861	3.18307	3.75006	2.98555	3.75847	3.65571	-3.84671	4.02769	3.9817	2.94318	3.37914	2.27213	3.3311	2.80396	3.67299	2.83292	3.3975	2.5666	2.82932	2.92725	2.67734	3.11334	2.94944	2.62543	2.75814	3.21252	2.06602	3.94126	3.08055	2.47328	2.74979	3.16568	2.99089	3.44197	3.2989	2.98346	3.48913	2.54793	3.288	2.31926	3.11402	2.96303	2.63854	2.94606	0.315028
hsa-miR-187	-3.92542	-3.20732	-3.77377	-3.93473	-3.97334	-4.0246	-4.47259	-4.58362	-6.48133	-4.20831	-3.75733	-3.55385	-4.04109	-2.644	-4.19485	-4.79233	-4.51951	-4.81036	-2.76271	-4.6335	-3.90781	-4.6212	-4.27278	-4.48541	-4.39373	-4.28297	-4.03743	-4.32425	-4.44186	-4.1264	-4.58336	-3.11812	-4.07548	-4.3597	-4.17078	-4.97844	-1.41812	-4.65934	-3.04349	-4.37395	-5.10946	-2.02839	-3.95267	-4.14235	-4.21641	-4.48586	-4.95843	-4.27425	0.318267
hsa-miR-10a	1.95344	0.438024	3.44522	4.98616	1.19443	2.43398	5.2087	0.701114	0.511439	0.129781	3.55083	2.95182	-4.04109	-1.15166	-1.18996	3.50102	5.94131	-1.71492	-2.59013	4.66913	-0.518084	4.73765	-0.123747	-0.246518	4.09042	4.05445	6.83131	-0.263377	3.32796	2.44129	1.37762	2.90984	1.7736	1.14118	1.7127	2.84329	1.25735	5.61505	0.682688	3.95884	3.35368	1.59873	2.00385	2.93915	2.74638	3.79291	-0.444363	0.54614	0.319348
hsa-miR-142-3p	-4.39794	-3.67722	1.50608	0.247972	-3.99592	7.71841	1.64677	-1.35314	-4.61688	-4.83096	0.112401	8.86082	10.3237	9.06391	9.79398	7.41523	-2.27163	-4.81036	8.2296	-4.33415	-4.62518	-4.6212	2.50795	-4.48541	-4.39373	-4.28297	-0.410822	3.02921	-3.30259	4.30532	2.02781	-3.66956	-3.40426	-4.3597	-1.35409	-4.81071	1.07588	-4.65934	-3.04349	3.14805	-3.96817	-2.42567	-3.39978	-4.14235	-4.21641	-4.48586	-3.14207	4.69403	0.319779
hsa-miR-185	-2.58898	-4.41912	-3.77377	-3.93473	-3.99592	-4.0246	-4.47259	-3.21115	-4.54807	-4.83096	-3.83349	-0.290514	-3.39681	-2.644	-4.19485	-4.42972	-4.51951	-4.21241	-2.76271	-3.49454	-4.11884	-2.81045	-4.27278	-4.48541	-4.39373	-0.806914	-4.03743	-4.32425	-4.44186	-4.1264	-4.40495	-4.20496	-3.72006	-4.3597	-4.17078	-4.93822	-3.97002	-4.65934	-3.04349	-4.37395	-5.10946	-4.75214	-2.70641	-4.14235	-2.18373	-4.48586	-4.95843	-4.27425	0.320039
hsa-miR-133a	-2.53321	-4.8537	-3.77377	-3.93473	-3.99592	-4.0246	-4.47259	-4.58362	-6.48133	-4.83096	-3.84671	-3.55385	-4.04109	-2.644	-4.19485	-3.55196	-4.51951	-4.81036	-2.76271	-4.6335	-4.62518	-4.6212	-4.27278	-4.48541	-4.39373	-4.28297	-4.03743	-4.32425	-4.44186	-4.1264	-4.56469	-4.20496	-4.07548	-4.3597	-4.17078	-4.97844	-3.97002	-4.65934	-3.04349	-3.97961	-5.10946	-3.47827	-4.15851	-3.33747	-4.21641	-4.48586	-4.95843	-4.27425	0.337986
hsa-miR-190	-3.92325	-3.03607	-0.86514	-3.93473	-3.99592	-4.0246	-3.7185	-3.9396	-4.35129	-2.92638	-3.84671	-3.55385	-4.04109	-2.644	-4.19485	-4.29748	1.87552	-4.40866	-2.76271	-2.55895	-4.62518	-3.74931	-4.27278	-3.39102	-4.05622	-4.12965	-2.8229	-4.05457	-4.44186	-4.1264	-2.77071	-4.20496	-4.07548	-2.76022	-3.93481	-2.40132	-3.79048	-2.35234	-3.04349	-4.37395	-1.42647	-1.69003	-4.15851	-1.93594	-4.21641	-3.48146	-3.29824	-4.10363	0.342121
hsa-miR-20	6.99072	7.59349	8.7253	8.0671	6.26796	9.39393	8.11281	6.7183	6.42334	6.74409	8.02576	11.7193	10.0819	8.86201	9.36316	9.03676	7.14885	7.33297	7.8893	8.32709	6.66718	7.0303	8.56643	8.69053	7.61266	7.5717	7.35858	8.98412	7.17876	9.10843	6.68523	6.50257	7.69505	8.14694	7.60715	6.05233	7.28756	6.61152	7.78148	6.79615	6.7008	6.51764	7.14554	7.40315	6.88381	6.89361	6.42857	7.21595	0.342311
hsa-miR-149	1.99373	2.9896	-1.91157	1.06643	3.88633	-2.35879	0.419152	0.576676	-5.028	0.689311	1.91321	-3.55385	-4.04109	-2.644	-3.70759	-0.291235	1.15066	3.83927	-2.52597	2.56909	1.36943	-1.09558	-4.27278	0.908153	1.0857	0.0478034	2.77821	0.201469	1.34797	-1.24322	1.71375	0.266126	-0.30339	1.67302	0.747247	1.17532	-0.499491	0.758182	-1.85483	0.00967193	2.36319	1.13288	1.08299	0.921461	-2.58523	1.40182	0.348508	1.33601	0.346186
hsa-miR-183	-1.29098	-2.08587	-3.27975	-2.01921	-0.309934	-2.57923	-1.6125	0.539413	-4.18623	-0.382297	0.223602	0.2599	-4.04109	-2.644	-4.19485	-2.06281	0.0306801	1.9606	-2.50611	-1.16898	0.350668	-2.45819	-0.585984	1.17249	-2.42939	-1.86235	-1.89826	-1.36237	-2.71309	-1.31195	-1.18265	-2.90357	-2.05878	-0.183893	-1.57554	0.155024	-3.97002	0.291689	-3.04349	-1.01352	-2.45923	-4.03585	-2.34705	-1.65969	-2.66214	-4.28992	-2.68601	-1.61553	0.347273
hsa-miR-382	-4.39794	-4.8537	-3.77377	-3.93473	-3.99592	-4.0246	-4.47259	-2.24505	3.75847	-4.83096	-3.84671	-3.55385	-4.04109	-2.644	-4.19485	-4.79233	-4.51951	-4.81036	-2.76271	-4.6335	-0.650169	-4.6212	-4.27278	-2.78763	-1.69545	-1.43289	-4.03743	-4.13246	-2.69393	-4.1264	-4.27224	0.888061	-4.07548	-4.3597	-4.17078	-0.102879	-3.97002	-4.65934	-3.04349	-4.37395	1.54249	1.2493	-3.99942	-3.31393	-4.21641	-0.587271	0.829842	-4.27425	0.348047
hsa-miR-15b	6.04086	5.82737	4.41789	5.09147	7.10267	6.14086	5.15483	4.89473	2.90867	6.69439	4.98821	5.9112	5.94152	4.95515	6.60582	4.3476	4.79688	5.87831	4.68022	6.73376	6.04421	4.68992	5.56724	5.47074	6.08478	4.01776	6.47663	4.51421	5.44832	5.39138	5.20885	6.20598	5.82221	5.29118	5.75613	6.75981	5.8142	5.9312	3.47725	4.53622	5.55933	5.28306	5.16385	5.99178	5.71341	7.04568	5.61381	6.10664	0.348411
hsa-miR-25	6.00818	4.94995	5.88883	5.80636	5.48307	6.17354	5.53142	7.62565	4.20681	6.12677	6.82387	7.89861	7.63448	6.71294	7.59615	6.24106	6.49433	6.82119	5.83067	5.13561	6.46256	4.77104	4.50945	6.29651	6.24871	5.19619	5.83431	4.8731	5.27028	5.177	6.22177	6.11938	6.91761	6.24871	6.79201	5.90181	6.29129	6.13413	4.5793	6.12237	6.02975	5.14322	5.14693	5.40085	6.40919	5.21666	5.84174	5.97303	0.359034
hsa-miR-93	6.56242	5.17825	6.00536	6.74456	6.03112	6.7119	6.32557	7.65625	3.75847	6.16841	7.02019	7.05754	7.30707	6.87511	7.86334	5.92744	6.85694	7.22101	6.29723	5.78564	7.15857	5.20544	5.17636	6.49464	6.53611	5.20717	5.57859	4.91417	5.33587	6.33698	6.09376	5.78199	6.8621	6.56418	6.87583	5.52938	6.80971	6.46631	4.66572	6.15834	6.1087	4.94089	5.50995	5.75313	5.7694	5.07542	5.18544	5.43616	0.360201
hsa-miR-26b	4.39621	5.20334	4.99638	5.10394	5.78965	5.2855	5.80815	6.19052	3.68086	6.26694	5.52282	5.85197	6.57162	4.40997	7.34872	4.85965	6.11265	6.19384	4.75302	5.92305	6.87429	4.39645	4.98516	6.0206	4.82675	5.07922	5.5441	5.65111	5.07723	5.66101	5.77042	4.9394	5.66775	5.65707	5.03436	5.07946	5.04473	5.86418	4.79574	4.78373	4.9627	3.92162	4.70075	4.75345	5.73867	5.66934	5.21312	5.40928	0.369979
hsa-miR-320	4.76543	3.97108	5.14801	5.27831	5.5002	5.28659	6.55637	4.03273	3.75847	5.7986	5.90046	5.53031	4.89742	4.46475	4.86032	6.24242	5.06764	5.24431	3.58302	4.68679	4.93392	5.01056	4.48366	5.86122	6.6768	3.55835	4.96539	5.85682	4.30132	4.92953	4.52202	5.50285	6.08999	5.09393	5.93268	5.3603	5.72126	4.61028	5.52681	4.53393	6.22808	5.39393	5.1646	5.44828	5.10612	6.3966	5.78444	4.38982	0.371452
hsa-miR-34b	-4.39794	-4.8537	-3.77377	-3.93473	-3.07536	-4.0246	-4.47259	-4.58362	3.75847	-4.83096	-3.84671	-3.55385	-4.04109	-2.644	-4.19485	-4.79233	-4.51951	-4.81036	-2.76271	-4.6335	-4.08628	-4.6212	-1.88062	-4.48541	-4.39373	-2.11943	-4.03743	-1.02449	-3.47202	-4.1264	-4.24434	-4.20496	-4.07548	-3.28086	-1.92596	-4.97844	-2.18605	-4.65934	-3.04349	-3.79825	-5.10946	-3.14745	-4.15851	-4.125	-4.21641	-4.48586	-2.66848	-1.83034	0.385101
hsa-miR-376a	-4.39794	-4.8537	-3.77377	-3.93473	-3.99592	-4.0246	-4.47259	-4.58362	3.75847	-4.83096	-3.84671	-3.55385	-4.04109	-2.644	-4.19485	-4.79233	-4.51951	-4.81036	-2.76271	-4.6335	-2.52163	-4.6212	-4.27278	-4.48541	-4.38554	-2.07298	-4.03743	-4.32425	-4.44186	-4.1264	-4.58336	-2.10182	-4.07548	-4.3597	-4.17078	-3.47447	-3.97002	-4.65934	-3.04349	-4.37395	-0.703318	-0.980949	-4.15851	-4.14235	-4.21641	-3.04405	-3.62311	-4.27425	0.388204
hsa-miR-17-3p	-2.24217	-0.754748	1.42121	-0.978792	-2.46182	0.145554	-0.357774	-0.710826	-0.744225	-0.949052	-1.64014	3.29365	1.73121	0.903273	0.849194	1.21559	-1.23105	-2.86102	-0.573068	-0.150724	-1.03577	-2.05063	-0.159013	-0.358942	-0.0867339	-2.04665	-1.13644	-0.498456	-1.08344	-0.184116	-2.47737	-1.64181	-0.82073	-1.18059	-1.32921	-1.75846	-1.80348	-2.47171	-2.0511	-1.23793	-2.69519	-0.964749	-2.4571	-1.47987	-0.56356	-1.32088	-1.57016	-1.77333	0.395453
hsa-miR-101	-0.217193	-0.328873	0.0560163	-0.173793	-0.260726	-0.181917	0.662722	0.0724425	-2.01258	1.30657	0.169663	1.62014	1.65169	-0.494426	-0.440183	0.894246	0.422388	0.116554	-0.385245	0.260417	-0.684076	-0.479238	0.0400724	0.831021	0.661782	-0.915957	-1.39419	-0.591068	-0.160443	0.545521	-0.808984	-0.954657	1.37038	-0.139329	-0.672107	-0.0682066	0.373639	0.0349164	-1.40192	-1.15329	-0.322732	-1.41063	-0.300434	-1.02979	0.541139	-0.379152	-1.04933	0.116413	0.39736
hsa-miR-125a	6.53794	5.92444	3.65856	5.24526	5.79241	1.05705	6.62454	6.71952	1.91816	5.87453	5.48848	5.63405	3.84113	0.332398	2.06884	3.78501	5.74467	5.35285	-2.00687	5.94918	6.75294	6.62276	5.0559	5.61844	6.30415	5.36712	5.69385	4.90599	6.34859	1.34405	6.79478	6.65577	4.96637	6.35134	6.56344	6.43077	4.88018	6.82332	3.04083	6.43097	5.07579	5.60325	4.80309	6.26516	5.15086	6.44813	6.65005	6.93241	0.403543
hsa-miR-106a	3.82383	4.13655	4.60224	4.26314	2.729	5.93726	4.88504	2.31181	2.46082	3.6198	4.27163	7.1799	5.36596	5.21431	5.72154	5.23139	3.28448	4.69616	4.08567	4.05709	3.35584	3.71352	4.79811	5.09673	4.27495	3.32546	3.62237	4.15519	3.89213	5.25429	2.53805	2.93302	4.73657	4.30564	4.23116	3.33495	3.44143	3.38468	2.86383	3.21386	3.40361	3.77971	3.49148	3.52766	2.87424	3.41982	2.89489	3.42849	0.404223
hsa-miR-30d	2.49941	3.53055	2.65207	3.5256	2.45758	2.20076	2.5438	3.56823	3.75847	2.4695	2.29223	3.37941	4.1708	2.66814	3.35572	2.88726	3.99501	3.06865	1.95055	3.20982	3.30803	3.21222	2.95205	2.80596	3.29997	2.21613	1.7962	2.66869	2.27331	2.18756	3.21793	1.36438	4.47396	3.33376	2.9078	2.83126	3.51041	3.35501	0.899715	3.0119	2.28773	2.45114	3.07885	3.03047	3.99489	2.0294	3.29029	3.33609	0.409654
hsa-miR-34c	-4.39794	-4.8537	-3.77377	-3.93473	-3.99592	-4.0246	-4.47259	-4.58362	3.75847	-4.83096	-3.84671	-3.55385	-4.04109	-2.644	-4.19485	-4.79233	-4.51951	-4.81036	-2.76271	-4.6335	-3.17054	-4.6212	-1.08383	-4.48541	-4.39373	-0.666236	-2.82653	-0.0981788	-2.85896	-4.1264	-4.58336	-4.20496	-4.07548	-3.54036	-0.040579	-4.97844	-1.3799	-4.65934	-3.04349	-3.55631	-5.10946	-1.85998	-4.15851	-4.14235	-4.21641	-4.48586	-2.02427	-0.0512623	0.410802
hsa-miR-370	-4.39794	-4.8537	-3.77377	-3.93473	-3.99592	-4.0246	-4.47259	-4.58362	3.75847	-4.83096	-3.84671	-3.55385	-4.04109	-2.644	-4.19485	-4.79233	-4.51951	-4.81036	-2.76271	-4.6335	-1.95621	-4.6212	-4.27278	-4.48541	-3.61886	-4.28297	-4.03743	-4.32425	-4.44186	-4.1264	-4.58336	-1.96789	-4.07548	-4.3597	-4.17078	-2.08225	-3.97002	-4.65934	-3.04349	-4.37395	0.00438005	-0.448814	-4.15851	-4.14235	-4.21641	-1.50799	-4.59099	-4.27425	0.421921
hsa-miR-150	-3.4394	-4.8537	2.91532	-2.425	-3.99592	-3.4191	-3.75036	-4.58362	-4.82445	-4.83096	-3.48829	-3.55385	-4.04109	-0.413903	4.53693	-1.99879	-4.51951	-3.118	-0.591964	-4.6335	-4.62518	-1.65511	-4.27278	-4.48541	-4.39373	-1.44793	-4.03743	-4.21652	-4.44186	-4.1264	0.873986	-4.20496	-3.82572	-4.3597	-3.50455	-3.28053	-3.97002	-4.65934	-3.04349	-1.11383	-4.582	-3.39765	-1.25869	-4.14235	-4.21641	-4.48586	-4.51071	-4.27425	0.422488
hsa-miR-206	-1.08392	-2.04507	-1.93067	-0.752121	-0.727546	-1.45053	-1.13563	-2.94905	-1.93434	-2.26543	-3.84671	-1.54205	-1.55963	-0.61371	-2.41217	-1.26828	-3.2938	-1.5124	-2.51317	-0.765428	-3.6179	-0.275034	-2.86249	-0.543992	-4.39373	1.47018	-1.92308	-2.7804	-2.242	-1.79669	-1.00601	-3.98654	-1.78853	-3.45564	-2.25193	-1.29762	-3.72451	-1.78195	-0.542177	-1.24834	-1.8104	-1.33321	-0.912459	-0.670488	-1.31464	-2.54986	-2.41508	-3.67621	0.423756
hsa-miR-18	2.62375	2.89786	3.26523	3.93233	1.48814	4.14975	2.66224	1.2226	-0.97835	1.97729	3.50785	6.69209	3.53835	2.95516	3.80249	3.08557	2.11367	2.95871	3.41895	3.17489	2.27443	1.5693	3.14754	3.35779	1.94781	1.333	2.23652	1.96863	2.24331	3.2112	-0.134171	1.34863	2.18293	2.74246	2.02833	0.957889	2.11749	1.5092	2.64247	0.904854	1.88989	1.4952	3.00454	3.09843	2.46217	2.18362	0.186693	0.874507	0.425021
hsa-miR-379	-4.39794	-4.8537	-3.77377	-3.93473	-3.99592	-4.0246	-4.47259	-4.10269	3.75847	-4.83096	-3.84671	-3.55385	-4.04109	-2.644	-4.19485	-4.79233	-4.51951	-4.81036	-2.76271	-4.6335	-2.46874	-4.6212	-4.27278	-4.48541	-3.85235	-2.46035	-4.03743	-4.32425	-4.44186	-4.1264	-4.58336	-1.65481	-4.07548	-4.3597	-4.17078	-2.6773	-3.97002	-4.65934	-3.04349	-4.37395	-0.491463	-0.642222	-4.15851	-4.14235	-4.21641	-2.7707	-0.918665	-4.27425	0.433553
hsa-miR-31	3.21689	-2.86355	1.26249	6.9113	-3.99592	4.47825	3.67134	-3.05646	3.75847	7.50458	7.90635	-3.55385	-4.04109	-1.31329	-4.19485	4.05969	-2.18392	6.52865	-2.76271	4.32876	3.33321	4.75544	4.7221	6.33134	4.75615	-4.28297	1.23361	3.5059	6.05745	7.28066	3.19309	6.42946	-0.422714	5.82295	-4.17078	4.40808	1.40735	5.62099	0.991627	5.23731	0.0830368	2.91585	0.0867996	3.85455	2.94923	4.98993	4.98312	5.42174	0.437054
hsa-let-7e	0.404655	0.670531	-1.63183	-0.134311	0.0602586	-3.72001	0.542521	0.658966	-3.54179	-0.522049	-0.940024	-1.92314	-1.67584	-2.644	-4.10195	-1.89504	-2.20652	-0.337718	-2.76271	0.44423	0.659198	0.674482	-1.22016	0.943726	0.205057	-0.51062	0.0534638	-0.29332	0.792172	-3.99531	-0.70069	-0.0845161	-1.40745	-0.106905	0.273878	-0.372288	-1.64186	1.39573	-0.991623	0.160839	-0.879977	-0.513439	-1.34542	0.210624	-0.594564	-0.177316	0.973676	0.412474	0.455149
hsa-miR-378	0.258429	-2.3792	0.586273	-1.42284	-1.36145	-1.11401	-0.137495	-0.404744	3.75847	1.51464	-3.84671	3.46385	2.72821	-0.0175327	0.586843	-1.38748	0.871688	-0.0191395	-0.280266	-0.938295	-0.66491	-2.2142	0.255477	1.4364	0.160928	-0.835344	-0.725614	0.190706	-2.16086	0.789651	-2.82401	-0.816489	2.29691	-0.445814	-1.35095	-3.14959	0.350004	-1.61876	1.19022	-1.30239	-1.84536	-2.27518	0.978513	-0.649224	0.827153	-1.3776	-1.52889	-0.520411	0.460082
hsa-miR-212	2.85488	-0.0232278	-1.88436	3.06766	-2.28388	-4.0246	-0.554505	-3.10601	-2.04577	-4.5422	-3.34195	-1.25092	-2.33932	-2.644	-1.82874	0.122406	-3.37574	-1.55711	-2.76271	-2.57282	-0.12471	1.74537	-3.68067	-2.72074	-1.70342	5.11237	-1.42747	0.229004	-0.680629	-1.48349	0.655724	-1.38275	-2.91417	-3.36707	-2.18612	-1.48755	-2.37507	-3.16201	2.25103	-0.00509257	-4.14535	-3.24903	0.726238	-2.61446	-2.38815	-2.73537	-1.87799	-2.75212	0.467912
hsa-miR-106b	5.36733	4.27247	5.31259	5.61193	5.16106	5.28349	4.99587	6.29513	2.20982	5.49295	5.2247	6.04856	6.76003	5.88935	6.61922	5.19004	5.89063	6.29775	5.07095	4.49206	6.37631	3.99072	3.99196	5.28114	5.5457	4.04085	4.44228	3.86122	4.19929	5.02638	4.8663	4.93446	5.62687	5.4981	5.475	4.93616	5.29852	5.30151	3.46905	4.51698	5.08719	4.00674	3.92098	4.61619	5.33352	4.39356	4.33922	4.48538	0.480199
hsa-miR-196a	-0.398284	0.120117	1.43589	2.11804	6.61471	-0.754725	0.994329	4.57534	0.214922	1.09657	1.69344	1.04114	-2.80954	-0.797454	-0.873084	3.65689	-0.555538	2.04194	1.58153	2.54393	1.88099	3.24436	3.12389	1.47952	3.60299	3.91801	0.938185	3.45884	0.904337	0.312993	1.49238	2.12896	2.61037	2.2989	-3.93041	2.03341	0.463171	3.79682	-0.0642711	4.2044	1.91848	1.39968	2.89605	3.59806	1.11984	2.80716	3.06093	-2.23257	0.481643
hsa-miR-323	-4.39794	-4.8537	-3.77377	-3.93473	-3.99592	-4.0246	-4.47259	-2.69718	3.75847	-4.83096	-3.84671	-3.55385	-4.04109	-2.644	-4.19485	-4.79233	-4.51951	-4.81036	-2.76271	-4.6335	-0.330655	-4.6212	-4.27278	-4.48541	-3.23663	-1.88086	-4.03743	-4.32425	-3.32668	-4.1264	-4.58336	-1.13636	-4.07548	-4.3597	-4.17078	-1.86328	-3.97002	-4.65934	-3.04349	-4.37395	0.794092	-0.0277711	-4.15851	-4.13091	-4.21641	-1.76098	-1.19212	-4.27425	0.484875
hsa-let-7c	5.45672	4.8856	4.88854	5.31786	5.34718	3.88242	6.84577	5.66288	3.94298	7.73353	4.56481	-1.35043	4.73496	3.25119	4.8002	5.02701	2.28111	7.62513	2.64163	6.2501	3.78743	6.45124	5.18413	6.36576	7.07296	5.06866	5.96609	5.97661	6.56759	3.5965	6.78733	7.39425	5.44064	4.42948	4.65782	7.54193	5.00107	6.72585	5.13723	6.0648	6.43142	6.14022	5.35642	5.47968	5.01483	6.87106	7.16251	4.43537	0.488079
hsa-let-7b	3.09323	3.80498	4.96506	4.85724	4.42823	3.10571	5.55619	4.24811	3.47374	3.32871	4.47133	-2.2022	3.76212	3.23549	3.68193	3.52744	0.813073	4.06381	2.18246	5.9827	1.44533	4.82288	4.22951	5.77294	5.82131	4.02232	5.38971	4.8986	6.033	0.913972	4.40025	6.39535	4.8568	2.84985	3.3795	6.1413	1.83462	6.23666	4.60914	4.51865	5.53732	5.24267	3.92314	5.01119	3.60842	5.222	6.41555	3.62652	0.49243
hsa-miR-108	-0.24948	-4.64686	-3.77377	-3.93473	-3.99592	-4.0246	-4.47259	-4.58362	-6.48133	-4.83096	-3.84671	-3.55385	-4.04109	-2.644	-4.19485	-3.98588	-4.51951	-4.81036	-2.76271	-4.6335	-4.62518	-3.73292	-4.27278	-4.48541	-4.39373	-1.19944	-4.03743	-4.32425	-4.44186	-4.1264	-4.50927	-4.20496	-4.07548	-4.3597	-4.17078	-4.97844	-3.97002	-4.65934	-3.04349	-4.37395	-5.10946	-4.75214	-1.78998	-4.14235	-4.21641	-4.48586	-4.95843	-4.27425	0.499275
[truncated: 5 more columns]

## Sheet: Liu et al. analysis
mirbase_name	BR:MCF7	BR:T47D	CO:COLO205	CO:HCC_2998	CO:HCT_116	CO:HCT_15	CO:HT29	CO:KM12	LC:NCI_H322M	OV:OVCAR_3	OV:OVCAR_4	BR:MDA_MB_231	BR:HS578T	BR:BT_549	CNS:SF_268	CNS:SF_295	CNS:SF_539	CNS:SNB_19	CNS:SNB_75	CNS:U251	CO:SW_620	LE:CCRF_CEM	LE:HL_60	LE:K_562	LE:MOLT_4	LE:SR	ME:LOXIMVI	ME:M14	ME:SK_MEL_2	ME:SK_MEL_28	ME:UACC_62	ME:MDA_MB_435	LC:HOP_62	LC:HOP_92	LC:NCI_H23	LC:NCI_H522	OV:IGROV1	OV:OVCAR_5	OV:OVCAR_8	OV:NCI_ADR_RES	PR:PC_3	RE:786_0	RE:A498	RE:ACHN	RE:CAKI_1	RE:RXF_393	RE:SN12C	RE:TK_10
	E	E	E	E	E	E	E	E	E	E	E	M	M	M	M	M	M	M	M	M	M	M	M	M	M	M	M	M	M	M	M	M	M	M	M	M	M	M	M	M	M	M	M	M	M	M	M	M	t.test
hsa-let-7a-1	5.78223	5.96059	5.28473	5.53941	5.01273	6.13299	5.71844	5.59437	5.32933	5.43717	5.8465	6.80613	6.36882	5.26004	6.13307	6.46914	6.02034	6.14966	6.75152	5.98574	4.45621	4.13945	5.56753	3.25477	6.69342	5.1575	5.3867	5.21388	5.51092	5.9959	5.20674	6.08902	7.24138	6.34742	4.96182	5.60288	4.4935	5.85222	5.05289	5.80522	7.77225	6.04844	5.53907	4.02198	4.80808	5.50419	5.35821	5.8311	0.883619
hsa-let-7a-2	5.78223	5.96059	5.28473	5.53941	5.01273	6.13299	5.71844	5.59437	5.32933	5.43717	5.8465	6.80613	6.36882	5.26004	6.13307	6.46914	6.02034	6.14966	6.75152	5.98574	4.45621	4.13945	5.56753	3.25477	6.69342	5.1575	5.3867	5.21388	5.51092	5.9959	5.20674	6.08902	7.24138	6.34742	4.96182	5.60288	4.4935	5.85222	5.05289	5.80522	7.77225	6.04844	5.53907	4.02198	4.80808	5.50419	5.35821	5.8311	0.883619
hsa-let-7a-3	5.78223	5.96059	5.28473	5.53941	5.01273	6.13299	5.71844	5.59437	5.32933	5.43717	5.8465	6.80613	6.36882	5.26004	6.13307	6.46914	6.02034	6.14966	6.75152	5.98574	4.45621	4.13945	5.56753	3.25477	6.69342	5.1575	5.3867	5.21388	5.51092	5.9959	5.20674	6.08902	7.24138	6.34742	4.96182	5.60288	4.4935	5.85222	5.05289	5.80522	7.77225	6.04844	5.53907	4.02198	4.80808	5.50419	5.35821	5.8311	0.883619
hsa-let-7a-1	-4.00187	-3.41228	-3.64656	-3.61457	-3.39764	-3.03782	-4.11624	-3.68703	-4.28534	-3.0705	-3.45364	-3.52926	-3.94772	-3.80239	-3.48907	-3.06416	-3.86184	-4.30556	-3.38297	-3.05452	-4.20351	-3.54526	-3.16745	-1.37984	-3.20055	-2.26044	-4.2572	-3.45097	-3.67336	-2.60742	-4.56645	-3.22795	-3.4968	-3.60636	-3.91625	-3.90315	-3.74759	-3.7852	-3.57383	-3.92938	-3.36612	-3.62418	-2.89402	-3.92232	-3.84207	-3.49615	-2.96879	-3.162	0.535717
hsa-let-7a-3	-4.00187	-3.41228	-3.64656	-3.61457	-3.39764	-3.03782	-4.11624	-3.68703	-4.28534	-3.0705	-3.45364	-3.52926	-3.94772	-3.80239	-3.48907	-3.06416	-3.86184	-4.30556	-3.38297	-3.05452	-4.20351	-3.54526	-3.16745	-1.37984	-3.20055	-2.26044	-4.2572	-3.45097	-3.67336	-2.60742	-4.56645	-3.22795	-3.4968	-3.60636	-3.91625	-3.90315	-3.74759	-3.7852	-3.57383	-3.92938	-3.36612	-3.62418	-2.89402	-3.92232	-3.84207	-3.49615	-2.96879	-3.162	0.535717
hsa-let-7b	4.23196	2.36863	4.1073	4.93036	3.43189	5.54889	4.86956	4.82795	3.86079	4.61328	5.59081	4.23796	5.7976	4.3711	5.09845	5.68546	5.00247	5.32154	6.06709	5.34191	3.77529	2.10265	3.39604	-1.24166	4.95862	3.17105	1.25142	4.30654	3.04075	5.2558	3.35253	4.96487	6.36177	3.70311	2.03821	3.90492	2.73267	5.28145	4.40184	5.27966	6.61034	5.45115	5.08623	3.35598	3.55731	4.94357	4.02067	3.86801	0.70699
hsa-let-7c	2.83601	1.26477	2.22807	2.93962	1.68832	3.99371	2.6766	2.59745	1.80477	4.78075	3.53515	2.70138	4.05892	2.97867	3.52368	4.4207	3.75572	4.02292	5.08569	4.10811	2.34941	0.41691	1.81064	-1.37984	2.20916	0.48907	0.94036	2.99921	2.53731	2.68286	2.24253	2.59202	4.44431	1.67335	1.56376	4.81703	1.47631	2.78778	3.04926	3.16174	4.17341	2.97932	3.42022	2.13003	2.98558	2.14673	3.20851	1.63161	0.908385
hsa-let-7d	4.34641	0.05688	3.01521	3.54782	3.01163	3.44682	3.67268	3.39159	3.97422	3.9034	3.26277	4.14174	2.80451	2.94228	3.29515	2.30547	3.67077	3.35296	3.20291	2.64205	2.43206	1.90405	3.95838	-1.37984	4.48567	4.00778	0.71951	2.69749	3.07664	3.05418	1.44835	3.80105	3.4466	1.20478	3.6398	3.62812	1.57616	3.68875	2.36648	2.42306	4.2917	3.53627	2.88115	1.78033	2.28158	3.21034	2.52794	4.18045	0.322383
hsa-let-7d	-3.55197	-3.41228	-3.64656	-3.61457	-3.12736	-3.17788	-3.7676	-3.68703	-3.78269	-2.71799	-2.60835	-3.13859	-4.41023	-3.44713	-3.41039	-3.09348	-3.86184	-4.30556	-3.69773	-3.20248	-4.38761	-3.54526	-3.07782	-0.27992	-3.01904	-2.26044	-4.2572	-3.97961	-3.11811	-2.60742	-3.56693	-3.22795	-3.4968	-3.60636	-3.84983	-2.48545	-4.02758	-3.7852	-3.66053	-2.56082	-3.22542	-3.04225	-2.82964	-3.96246	-3.74956	-3.49615	-3.67534	-2.5107	0.918202
hsa-let-7e	3.83021	2.84281	-2.89295	0.66794	1.59975	2.697	3.40077	-0.02295	3.81379	3.77712	4.44282	3.35848	2.88329	2.2353	1.96232	2.88269	3.45092	3.05033	3.94108	2.57262	0.58769	-3.54526	-1.92	1.94031	-2.53549	-2.26044	-3.79502	2.27765	2.13217	2.26285	1.14416	2.37012	4.14207	3.59742	4.12096	2.28225	1.68909	3.05453	1.99615	3.22008	3.98784	3.70278	3.44406	1.44408	1.48586	3.91341	1.96691	3.51373	0.750478
hsa-let-7e	-3.85048	-3.41228	-3.64656	-3.61457	-3.29938	-3.45342	-3.95869	-3.68703	-4.24103	-3.02274	-2.86128	-3.33692	-4.28107	-3.80239	-3.63916	-3.09348	-3.86184	-4.30556	-3.33568	-3.20248	-4.38761	-3.54526	-3.16745	-1.05077	-3.20055	-2.26044	-4.2572	-3.97961	-3.62572	-2.60742	-4.3138	-3.22795	-3.30275	-3.60636	-3.90725	-3.0967	-4.02758	-3.7852	-3.66053	-3.84879	-3.35847	-3.62012	-2.89402	-3.96246	-3.993	-3.49615	-3.96647	-3.162	0.877842
hsa-let-7f-1	5.95692	4.84627	5.58231	5.55277	4.73927	5.91916	5.61578	5.61377	5.69477	4.72072	5.44733	6.57908	5.61363	4.90031	5.65926	5.85093	5.76652	5.82714	6.25331	5.55228	4.82978	4.58985	6.24158	2.1888	6.78278	5.6779	4.54903	5.27943	5.29461	4.81906	4.64901	5.73844	6.69602	5.46182	5.41803	5.73958	4.15452	5.35255	5.0159	5.08804	7.01305	5.36953	5.07544	4.36494	4.94461	5.00549	5.30268	5.86864	0.822996
hsa-let-7f-2	5.95692	4.84627	5.58231	5.55277	4.73927	5.91916	5.61578	5.61377	5.69477	4.72072	5.44733	6.57908	5.61363	4.90031	5.65926	5.85093	5.76652	5.82714	6.25331	5.55228	4.82978	4.58985	6.24158	2.1888	6.78278	5.6779	4.54903	5.27943	5.29461	4.81906	4.64901	5.73844	6.69602	5.46182	5.41803	5.73958	4.15452	5.35255	5.0159	5.08804	7.01305	5.36953	5.07544	4.36494	4.94461	5.00549	5.30268	5.86864	0.822996
hsa-let-7g	3.90101	0.73677	3.73342	4.28827	3.35396	4.25033	3.43974	4.47052	4.11295	3.53291	4.49815	4.42272	3.68555	2.86764	3.05089	3.3771	3.52665	3.45644	4.3692	3.2052	3.27463	3.2744	5.02474	-0.7205	5.69986	4.70867	1.23488	3.39171	4.09491	3.4756	2.14105	4.46036	4.43374	3.21808	3.86197	3.89208	2.8172	3.90066	3.5638	4.2611	5.00374	3.94317	3.22757	3.08344	2.77848	3.23735	3.77728	4.10706	0.746748
hsa-let-7i	4.51754	-1.23145	3.19936	3.0999	2.96744	3.06348	5.22992	3.46628	4.44654	3.46286	3.55476	4.81564	5.18849	4.4307	3.77043	3.73663	5.28517	3.74226	3.51885	3.83472	2.59276	2.31906	3.83178	-0.12019	5.27076	4.31484	2.67725	4.28005	4.44958	5.96159	3.18732	5.35068	5.91867	2.70878	4.16822	3.86275	1.71305	5.75152	3.09826	4.93509	4.96309	4.43071	5.65451	4.8233	4.46083	5.09498	5.21341	4.68133	0.0593474
hsa-let-7i	-4.00187	-3.41228	-3.64656	-3.61457	-3.39764	-3.45342	-4.1044	-3.68703	-4.28534	-3.0705	-3.45364	-3.52926	-4.41023	-3.80239	-3.63916	-3.09348	-3.86184	-4.30556	-3.69773	-3.20248	-4.38761	-3.54526	-3.16745	-1.37984	-3.20055	-2.26044	-4.2572	-3.97961	-3.67336	-2.60742	-4.65498	-3.22795	-3.4968	-3.60636	-3.91625	-3.82202	-4.02758	-3.7852	-3.66053	-3.92938	-3.36612	-3.62418	-2.89402	-2.85099	-3.68221	-3.49615	-2.37493	-3.162	0.481095
hsa-mir-100	-1.70776	-1.19953	-3.64656	-3.61457	4.0061	-3.45342	-4.11624	-3.68703	-0.91922	1.49904	-1.45893	6.0753	4.44823	2.95251	4.6769	5.30873	3.66242	3.63513	4.20469	3.77087	-0.15578	-3.54526	-3.16745	-1.37984	-3.20055	-2.26044	5.69469	2.23025	3.7645	2.60715	4.37108	3.92063	5.95567	5.67354	-1.57012	1.92284	-4.02758	0.51582	0.00383	3.44745	6.55004	3.20879	2.53099	-3.96246	2.70416	2.07384	3.81337	-3.162	0.00126832
hsa-mir-100	-4.00187	-3.41228	-3.64656	-3.61457	-2.65739	-3.45342	-4.11624	-3.68703	-4.28534	-3.0705	-3.45364	-1.37924	-3.44423	-3.80239	-2.49697	-1.7093	-3.86184	-4.28115	-3.53035	-3.15927	-4.38761	-3.54526	-3.16745	-1.37984	-3.20055	-2.26044	-0.95544	-3.65718	-3.67336	-2.60742	-2.65435	-3.22795	-1.55125	-1.57101	-3.91625	-3.90315	-4.02758	-3.7852	-3.66053	-3.92938	-1.23401	-3.62418	-2.89402	-3.96246	-4.46534	-3.49615	-3.01769	-3.162	0.119145
hsa-mir-101-1	0.46033	1.1887	0.02769	0.00128	0.02261	-0.03788	0.05017	0.01178	-0.46406	-0.82967	-0.25677	-0.57721	-1.46928	-0.22492	-1.4401	-0.73357	-0.15498	-1.00746	-0.32747	-0.45088	0.04784	-0.86009	1.88363	0.48098	1.00996	0.36458	0.40813	-0.1513	0.42499	-0.2999	-0.33703	0.15081	0.31818	-0.58668	0.00775	-0.47062	-0.12933	-0.22621	-0.50084	-0.29437	1.03625	-0.40718	-1.407	-0.9025	-0.72783	-1.11129	-0.8683	-0.41075	0.220686
hsa-mir-101-2	0.46033	1.1887	0.02769	0.00128	0.02261	-0.03788	0.05017	0.01178	-0.46406	-0.82967	-0.25677	-0.57721	-1.46928	-0.22492	-1.4401	-0.73357	-0.15498	-1.00746	-0.32747	-0.45088	0.04784	-0.86009	1.88363	0.48098	1.00996	0.36458	0.40813	-0.1513	0.42499	-0.2999	-0.33703	0.15081	0.31818	-0.58668	0.00775	-0.47062	-0.12933	-0.22621	-0.50084	-0.29437	1.03625	-0.40718	-1.407	-0.9025	-0.72783	-1.11129	-0.8683	-0.41075	0.220686
hsa-mir-103-1	4.15775	4.87006	4.34869	3.02383	3.22399	3.49854	3.72332	3.70919	3.96139	3.79626	4.41123	4.00642	2.78262	2.99958	3.48673	2.14643	3.27027	2.87891	2.98239	2.66954	3.29836	3.84689	3.94754	3.13139	5.0361	4.15995	3.31704	2.88568	4.30764	4.04641	2.88509	3.20692	4.00732	2.40069	4.14174	4.03118	3.34643	4.13982	3.05014	4.19299	3.85195	3.66811	2.54394	1.45711	1.95703	3.69174	1.67824	3.74679	0.035501
hsa-mir-103-2	4.15775	4.87006	4.34869	3.02383	3.22399	3.49854	3.72332	3.70919	3.96139	3.79626	4.41123	4.00642	2.78262	2.99958	3.48673	2.14643	3.27027	2.87891	2.98239	2.66954	3.29836	3.84689	3.94754	3.13139	5.0361	4.15995	3.31704	2.88568	4.30764	4.04641	2.88509	3.20692	4.00732	2.40069	4.14174	4.03118	3.34643	4.13982	3.05014	4.19299	3.85195	3.66811	2.54394	1.45711	1.95703	3.69174	1.67824	3.74679	0.035501
hsa-mir-105-1	-4.00187	-3.41228	-3.64656	-3.61457	-3.39764	-3.45342	-4.11624	-3.68703	-4.28534	-3.0705	-3.45364	-3.52926	-4.41023	-3.80239	-3.53362	-3.09348	-3.30686	-4.30556	-3.01203	-2.55163	-4.38761	-3.54526	-3.16745	-1.37984	-3.20055	-2.26044	-3.76031	-2.79922	-1.67321	-2.42029	-2.74213	-1.89003	-3.4968	-2.85137	-3.91625	-3.90315	-4.02758	-3.7852	-3.66053	-3.92938	-3.36612	-3.62418	-2.89402	-3.96246	-4.51288	-3.49615	-2.66949	-3.162	0.143661
hsa-mir-105-2	-4.00187	-3.41228	-3.64656	-3.61457	-3.39764	-3.45342	-4.11624	-3.68703	-4.28534	-3.0705	-3.45364	-3.52926	-4.41023	-3.80239	-3.53362	-3.09348	-3.30686	-4.30556	-3.01203	-2.55163	-4.38761	-3.54526	-3.16745	-1.37984	-3.20055	-2.26044	-3.76031	-2.79922	-1.67321	-2.42029	-2.74213	-1.89003	-3.4968	-2.85137	-3.91625	-3.90315	-4.02758	-3.7852	-3.66053	-3.92938	-3.36612	-3.62418	-2.89402	-3.96246	-4.51288	-3.49615	-2.66949	-3.162	0.143661
hsa-mir-106a	-1.23832	-0.99505	1.27371	0.78477	-0.25688	0.5306	-0.11522	0.63264	-1.19054	-1.35285	-1.5366	-0.59361	-2.07656	-0.24942	-1.50353	-1.39357	-1.13075	-1.53387	-1.1235	-0.71722	1.11443	1.95688	2.21254	2.04642	1.49634	0.2894	0.67463	0.3405	-2.86443	-2.60742	-0.65884	-0.76718	-0.73696	-1.32564	-2.35121	-0.13712	0.18715	-1.10505	0.66303	-1.12155	-0.19369	-2.66713	-2.46725	-0.58118	-0.21853	-1.29879	-0.40115	-0.8796	0.528736
hsa-mir-106a	-4.00187	-3.41228	-3.64656	-3.61457	-3.39764	-3.45342	-4.11624	-3.68703	-4.28534	-3.0705	-3.45364	-3.52926	-4.41023	-3.80239	-3.63916	-3.09348	-3.86184	-4.30556	-3.69773	-3.20248	-4.38761	-1.92102	-3.16745	-1.37984	-3.1508	-2.26044	-4.2572	-3.14666	-3.67336	-2.60742	-4.65498	-2.26381	-3.4968	-3.60636	-3.91625	-0.84912	-4.02758	-3.7852	-3.66053	-3.92938	-3.36612	-3.62418	-2.89402	-3.96246	-4.51288	-3.49615	-4.54925	-3.162	0.435398
hsa-mir-106b	5.24125	3.77797	3.51708	3.75969	2.94316	3.29338	3.9419	3.8517	2.62341	2.34103	3.94248	3.89943	2.59487	2.66742	3.14128	2.89466	2.47984	2.17709	3.62883	2.58221	3.69661	3.94015	4.48158	4.23111	6.01855	4.58362	2.2732	3.06559	3.79921	3.23767	2.14044	3.87969	3.07325	3.55851	4.35014	4.02366	2.96621	3.1152	2.26141	2.11584	3.97083	3.04805	3.72461	2.3589	1.61827	3.17506	2.05521	3.93982	0.32256
hsa-mir-106b	-2.91569	-3.41228	-3.64656	-3.61457	-3.39764	-3.25525	-3.9898	-3.68703	-4.28534	-3.0705	-3.45364	-3.52926	-4.41023	-3.80239	-3.39637	-3.09348	-3.86184	-4.30556	-3.69773	-3.20248	-3.22618	-2.2585	-2.37041	-1.37984	-2.21951	-2.26044	-4.2572	-3.36834	-3.67336	-2.60742	-4.65498	-3.22795	-3.4968	-3.60636	-3.91625	-3.78231	-3.9136	-3.7852	-3.66053	-3.92938	-3.36612	-3.62418	-2.89402	-3.96246	-4.51288	-3.49615	-4.54925	-3.162	0.832146
hsa-mir-107	4.23818	4.76326	4.15343	3.47422	3.20206	3.65739	3.82397	3.68872	3.92917	3.63318	4.33347	4.11519	2.99518	3.24956	3.41946	2.28481	3.47589	2.95247	3.17358	2.73726	3.47461	3.90549	4.11269	2.78274	4.8331	3.89771	3.41663	3.06267	3.93197	3.647	2.86717	3.04966	3.93368	2.64285	4.27431	3.89315	3.46943	3.60999	3.09361	3.59956	3.53537	3.38517	2.43581	2.20727	2.27288	3.33715	2.13528	3.40453	0.00573091
hsa-mir-10a	-4.00187	0.12828	1.28689	2.71937	0.91321	4.18786	4.09543	1.04429	-1.02154	-2.58148	1.51541	0.68085	-2.49558	1.00564	1.07125	0.74907	1.2447	0.60102	-0.1334	0.06122	2.41782	-3.54526	-3.16745	1.14324	-3.20055	-2.26044	0.58721	1.50643	-1.18376	1.43675	-0.11433	0.07714	1.69793	-1.25391	-2.47458	-3.37672	3.28014	1.77248	-2.36141	-1.68826	-2.42375	2.61701	1.55797	1.64903	2.1145	0.61494	4.82727	-0.40972	0.366105
hsa-mir-10a	-4.00187	-3.41228	-3.64656	-3.29733	-3.39764	-1.35308	-2.43979	-3.68703	-4.28534	-3.0705	-3.45364	-3.52926	-4.41023	-3.76921	-3.63916	-3.09348	-3.86184	-4.30556	-3.69773	-3.20248	-2.77614	-3.54526	-3.16745	-1.37984	-3.20055	-2.26044	-3.99241	-2.85108	-3.67336	-2.60742	-4.45893	-3.22795	-3.4968	-3.60636	-3.91625	-3.90315	-1.90665	-3.7852	-3.66053	-3.92938	-3.36612	-3.62418	-2.89402	-2.94602	-2.67666	-3.49615	-0.14577	-3.162	0.994168
hsa-mir-10b	-4.00187	-2.78602	-1.44745	-0.07731	-1.09399	2.17609	0.79648	1.33761	-3.95904	1.62946	-2.51389	-2.37736	-4.41023	-1.88457	0.66377	0.39761	1.0303	0.87714	1.70736	0.92202	0.08323	-3.54526	-3.16745	-1.3218	-3.20055	-2.26044	-2.24531	0.14795	-0.40803	0.26532	0.32152	0.31646	-0.09879	-3.60636	-2.1913	-0.21131	3.32573	-2.31251	-2.65312	-0.67073	0.10985	-0.20448	0.72209	0.94737	0.7395	-0.21297	2.75446	-3.162	0.729327
hsa-miR-1224-5p	-2.17349	-2.2074	-1.50519	-0.96059	-1.58919	-1.65642	-2.02729	-1.36139	-3.11648	-2.92958	-2.64474	-1.76608	-3.31245	0.45009	-0.73977	-1.4317	-2.12457	-2.05681	-1.89462	-1.26309	-1.33678	1.65896	-1.20369	-1.04141	-1.9224	0.03751	-0.54389	-0.98841	-2.71096	-1.50341	-0.42378	-2.33463	-1.85338	-1.23079	-2.71927	-3.26455	-1.29745	-2.81865	-0.29957	-2.853	-1.91331	-2.74941	-2.06131	-0.31856	-1.78782	-1.20118	-1.33791	-1.82723	0.142358
hsa-miR-1225-3p	-3.41993	-2.85754	-2.99749	-2.46965	-2.18514	-2.84296	-3.74514	-3.23829	-3.89824	-2.48798	-2.79549	-3.20667	-4.10231	-2.87498	-2.16903	-2.20444	-3.07412	-3.57442	-3.25516	-1.9807	-3.60175	-1.96138	-2.0621	-1.20953	-3.02727	-1.93071	-2.64331	-2.93612	-3.33494	-2.23405	-3.42844	-2.9947	-2.92433	-3.17721	-3.68532	-3.40106	-2.74598	-3.7852	-2.61862	-3.73738	-2.9952	-3.34112	-2.5526	-2.42206	-3.1416	-3.32933	-3.42402	-2.55721	0.689903
hsa-miR-1225-3p	-0.29742	-0.21196	0.87721	1.83957	0.45533	0.17931	-0.06107	0.92044	-1.03779	0.04798	-0.64964	0.30681	-0.50975	2.05117	0.88724	0.39253	0.23159	0.1211	0.28027	0.69338	0.30574	2.92886	0.84395	1.49438	0.43699	1.9186	2.00238	0.61229	0.29518	1.02616	0.87671	-0.19124	-0.13928	0.37775	-0.5975	-0.93201	0.35378	-0.757	1.04774	-0.57353	-0.05253	-0.49427	1.72796	1.44042	0.10431	0.48831	0.15747	0.64628	0.240486
hsa-miR-1226*	-3.56934	-3.33707	-3.46143	-2.47984	-1.91468	-2.12861	-4.11624	-3.68703	-4.28534	-3.0705	-3.45364	-3.33595	-4.00722	-1.72741	-2.22008	-1.59621	-3.53863	-4.15294	-3.24815	-2.01557	-2.43536	-1.02478	-1.6029	-1.37984	-3.20055	-2.26044	-1.08271	-1.71903	-3.67336	-2.60742	-1.6505	-3.22795	-3.4968	-3.60636	-3.91625	-3.90315	-1.61002	-3.7852	-1.6498	-3.92938	-3.36612	-3.62418	-2.89402	-0.83264	-1.76064	-3.49615	-1.71363	-3.162	0.0945026
hsa-miR-1228	-2.57606	-1.83155	-2.28381	-1.75273	-1.26099	-1.56474	-2.86704	-2.2	-3.0062	-1.78108	-2.3224	-2.14077	-3.12289	-1.71946	-1.22487	-0.98954	-2.22478	-2.89365	-2.33553	-0.82553	-2.49179	-1.091	-0.94882	-0.66672	-2.07911	-0.98286	-1.71228	-1.82916	-2.68693	-1.59181	-2.39559	-2.32439	-2.12514	-2.31425	-2.99625	-2.79456	-1.77056	-3.28255	-1.44903	-3.1512	-2.35854	-2.77022	-1.70681	-1.64617	-2.13131	-2.45073	-2.32306	-1.63964	0.66842
hsa-miR-1234	-2.44294	-1.57768	-2.17643	-1.52312	-1.17635	-1.59445	-3.02569	-2.11352	-3.05429	-2.03438	-2.28228	-2.24927	-3.10305	-1.65346	-1.25183	-1.06035	-2.36714	-3.11431	-2.25153	-0.80853	-2.35122	-0.87538	-1.03365	-0.84952	-2.3325	-1.36014	-0.89939	-1.64182	-2.65664	-1.80911	-2.19031	-2.23172	-2.00604	-2.03787	-2.74181	-3.16074	-1.83304	-3.51948	-1.28551	-3.40058	-1.57083	-2.70114	-1.88668	-1.12954	-2.00436	-2.75574	-2.15697	-1.78519	0.72186
hsa-miR-1238	-3.53873	-2.71589	-3.33571	-2.86708	-2.09377	-2.50965	-3.85744	-2.97399	-3.99768	-2.75045	-2.97953	-3.23525	-4.10987	-2.79457	-2.19241	-1.99275	-3.08686	-4.05011	-3.42219	-1.74936	-3.54444	-2.26019	-2.04696	-1.34823	-3.06943	-2.14842	-3.1046	-2.85839	-3.59381	-2.52569	-3.45628	-3.0254	-2.93541	-3.35616	-3.87967	-3.67567	-2.81141	-3.7852	-2.40208	-3.92938	-3.34218	-3.62418	-2.72396	-2.69581	-3.08058	-3.34829	-3.289	-2.69256	0.819124
hsa-mir-125a	-1.94597	-2.10787	-2.3443	-1.33583	-1.15471	-1.232	-2.16602	-2.59704	-2.67555	-1.74588	-1.46608	-2.00507	-2.64245	-0.12722	-1.00783	-0.6186	-1.75535	-2.2549	-1.34805	-0.69688	-1.58998	0.64597	-0.75993	-1.37239	-2.83363	-1.53837	-0.33204	-0.6749	-3.18824	-2.39158	-0.4008	-2.71244	-1.63843	-1.71319	-2.12781	-3.77388	-0.62496	-2.63169	-0.63514	-2.92755	-1.92321	-2.17908	-1.64295	-0.17885	-0.88844	-1.6743	-0.88896	-1.96842	0.270719
hsa-mir-125a	2.04701	2.10722	-3.64656	-0.66047	0.48403	1.6216	1.39944	-1.62039	1.93371	2.46633	2.89511	1.94362	1.29626	1.22555	0.57862	1.89613	2.27857	1.62452	2.48033	1.36288	-0.24085	-3.54526	-3.16745	1.83525	-3.20055	-2.26044	-4.2572	1.20307	0.11068	0.62798	-0.31661	0.80407	2.33488	1.91157	2.34837	0.56272	0.88093	1.16102	0.84065	1.5915	2.04016	2.07825	2.40154	0.48636	0.45853	2.23064	0.84436	1.70357	0.857367
hsa-mir-125b-1	0.39152	0.73854	-3.64656	-3.61457	4.2091	-3.45342	-4.11624	-3.68703	-1.03301	4.21238	1.37215	5.45507	5.11566	3.91762	5.53166	5.67669	4.32572	4.16241	5.28522	4.76805	-0.2224	-3.54526	-3.16745	-1.37984	-3.20055	-2.26044	5.69979	2.55685	3.32152	2.18389	4.29012	3.09763	5.55621	5.19369	0.88763	4.62856	-2.87136	-0.37617	0.47732	2.44024	5.73016	1.92668	3.38029	0.66836	3.3797	0.92931	3.98934	-0.56039	0.00377228
hsa-mir-125b-2	0.39152	0.73854	-3.64656	-3.61457	4.2091	-3.45342	-4.11624	-3.68703	-1.03301	4.21238	1.37215	5.45507	5.11566	3.91762	5.53166	5.67669	4.32572	4.16241	5.28522	4.76805	-0.2224	-3.54526	-3.16745	-1.37984	-3.20055	-2.26044	5.69979	2.55685	3.32152	2.18389	4.29012	3.09763	5.55621	5.19369	0.88763	4.62856	-2.87136	-0.37617	0.47732	2.44024	5.73016	1.92668	3.38029	0.66836	3.3797	0.92931	3.98934	-0.56039	0.00377228
hsa-mir-125b-2	-3.96438	-3.41228	-3.64656	-3.61457	-3.39764	-3.45342	-4.11624	-3.68703	-4.28534	-1.22556	-3.14284	-3.52926	-4.41023	-1.8812	-3.43673	-2.31284	-2.69406	-2.88294	-1.20252	-2.18933	-4.38761	-1.3108	-3.16745	-1.37984	-3.20055	-2.26044	-1.92364	-3.97961	-3.6213	-2.60742	-2.9251	-3.22795	-3.4968	-3.60636	-3.79717	-0.79594	-4.02758	-3.7852	-3.15758	-3.92938	-3.36612	-3.62418	-1.71361	-2.75997	-2.6103	-3.49615	-4.21959	-3.162	0.136702
hsa-mir-126	-0.01568	-0.8088	-3.64656	-1.1212	-0.30645	-3.45342	-3.36962	-3.68703	-0.35575	-1.63873	-3.45364	-0.74891	-2.77003	-3.80239	-2.9244	-2.07576	-3.86184	-2.12515	-1.97806	-3.20248	-1.44074	0.1759	-3.16745	5.33685	-3.20055	-2.26044	-0.23726	-1.84651	-3.61825	-2.60742	-1.83165	-3.22795	-1.73517	-3.60636	-0.59958	-0.64481	-1.2608	-2.17257	-0.68146	0.14781	-3.36612	-3.62418	-0.4365	-1.58625	-1.4299	-3.20274	-1.97075	-3.162	0.896258
hsa-mir-126	-4.00187	-3.41228	-3.64656	-3.61457	-3.39764	-3.45342	-4.11624	-3.68703	-4.28534	-3.0705	-3.45364	-3.52926	-4.41023	-3.80239	-3.63916	-3.09348	-3.86184	-4.30556	-3.69773	-3.20248	-4.24428	-2.77703	-3.16745	-0.58981	-3.20055	-2.26044	-3.58258	-3.97961	-3.67336	-2.60742	-4.64789	-3.22795	-3.4968	-3.60636	-3.91625	-3.90315	-3.97387	-3.7852	-3.54284	-3.92938	-3.36612	-3.62418	-2.89402	-3.96246	-4.38325	-3.49615	-4.54925	-3.162	0.645331
hsa-mir-127	-3.03342	-3.41228	-3.64656	-3.61457	-3.39764	-3.45342	-4.11624	-3.68703	-4.28534	-3.0705	-3.45364	-3.52926	0.22524	-1.48812	1.11242	-1.02207	-1.61907	1.08039	-2.58218	-0.49174	-4.38761	-3.54526	-3.16745	-1.37984	-3.20055	-2.26044	-4.2572	-3.97961	-3.67336	-2.60742	-4.65498	-3.22795	-2.48435	-3.60636	0.15008	-3.90315	-4.02758	-3.7852	-3.66053	-3.92938	-3.36612	-3.62418	-2.89402	-1.03026	-4.51288	-3.49615	-4.54925	-3.162	0.0897506
hsa-mir-128a	1.05058	0.73799	-0.15512	0.86056	0.63635	0.52	-0.07761	0.84087	0.89757	0.87182	0.9547	0.09478	-0.05122	-0.93502	-0.48005	-0.40599	0.11337	-0.41275	0.68605	0.15185	0.72329	3.89027	1.35205	0.94842	4.83827	0.77	-0.4481	-0.41524	-0.82339	0.65374	0.929	-0.04818	0.31961	-0.30766	1.495	0.57387	0.65196	0.35446	-0.13701	0.44408	1.11133	0.1726	-0.76897	-0.62649	-1.14958	0.62727	-0.08081	-0.26736	0.437873
hsa-mir-128b	1.05058	0.73799	-0.15512	0.86056	0.63635	0.52	-0.07761	0.84087	0.89757	0.87182	0.9547	0.09478	-0.05122	-0.93502	-0.48005	-0.40599	0.11337	-0.41275	0.68605	0.15185	0.72329	3.89027	1.35205	0.94842	4.83827	0.77	-0.4481	-0.41524	-0.82339	0.65374	0.929	-0.04818	0.31961	-0.30766	1.495	0.57387	0.65196	0.35446	-0.13701	0.44408	1.11133	0.1726	-0.76897	-0.62649	-1.14958	0.62727	-0.08081	-0.26736	0.437873
hsa-mir-129-1	-4.00187	-3.41228	-3.64656	-3.61457	-3.39764	-3.45342	-4.11624	-3.68703	-3.16099	-3.0705	-3.0128	-3.52926	-4.41023	-3.80239	-3.63916	-3.09348	-3.10646	-3.66034	-3.69773	-3.20248	-4.38761	-3.54526	-0.0743	-1.37928	-3.20055	-2.26044	-4.24247	-3.97961	-3.67336	-2.60742	-4.64187	-3.22795	-3.4968	-2.40748	-3.91625	-3.45968	-4.02758	-3.7852	-3.66053	-3.92938	-3.36612	-3.62418	-2.89402	-3.82611	-4.38979	-3.49615	-4.5299	-3.162	0.81051
hsa-mir-129-2	-2.85213	-3.41228	-3.64656	-3.61457	-3.39764	-3.45342	-4.11624	-3.68703	-2.85029	-3.0705	-3.45364	-3.52926	-2.6679	-3.80239	-3.19618	-3.09348	-3.86184	-4.30556	-3.69773	-3.20248	-4.38761	-3.54526	-2.48144	-1.29898	-3.20055	-2.26044	0.02923	-3.97961	-3.67336	1.19265	-3.6115	-3.22795	-3.4968	-3.60636	-3.10292	-3.22141	-4.02758	-3.7852	-1.18649	-1.01961	-3.36612	-3.22228	-2.89402	-3.96246	-4.3612	-3.49615	-4.16774	-3.162	0.370873
hsa-mir-130a	-4.00187	4.92681	-3.64656	-3.61457	1.52651	-3.45342	-4.11624	-3.68703	5.30856	3.55782	4.24411	3.99446	2.74999	2.79246	3.91773	1.18119	2.81868	2.29102	2.69543	1.93061	-4.38761	2.01625	-3.16745	-1.37984	2.72395	-2.26044	3.36063	2.64505	2.14751	2.5288	-0.06897	2.73776	4.07811	1.86816	3.46087	4.89785	-4.02758	2.90699	4.30104	5.0225	-0.559	1.51496	1.35379	2.4369	2.09926	-1.33751	4.01363	2.67159	0.0414307
hsa-mir-130b	0.94721	1.01209	1.0927	1.37106	0.73437	1.32884	0.51491	2.14605	1.21057	1.44489	2.10866	1.45438	1.52607	0.10551	1.74285	0.60108	0.57001	0.34936	1.50518	1.22192	0.88768	2.4189	0.83217	4.43784	4.3104	2.54682	-0.56072	0.48075	0.36821	1.67685	0.13519	0.62449	1.82453	1.43963	0.07203	1.44765	0.82361	1.11083	0.76586	1.22905	1.54147	1.15719	-0.15567	-1.3676	-1.19181	1.17854	0.37877	0.63753	0.523696
hsa-mir-130b	-4.00187	-3.41228	-3.64656	-3.61457	-3.39764	-3.45342	-4.11624	-3.68703	-4.28534	-3.0705	-3.23441	-3.52926	-4.41023	-3.80239	-3.63916	-3.09348	-3.86184	-4.30556	-3.69773	-3.20248	-4.38761	-2.54329	-3.16745	-0.99396	-3.03998	-2.26044	-4.2572	-3.97961	-3.67336	-2.60742	-4.24164	-3.22795	-3.4968	-3.60636	-3.91625	-3.20207	-4.02758	-3.7852	-3.66053	-3.92938	-3.36612	-3.62418	-2.89402	-3.96246	-4.34956	-3.49615	-4.20438	-3.162	0.648875
hsa-mir-132	-1.09367	-1.77294	-3.51876	-1.0277	-1.98241	-1.59733	-0.97124	-2.44682	-2.92188	-3.0705	-3.32165	-0.95823	-2.19452	-0.42607	-2.30904	-1.69987	-1.92839	-2.47746	-1.19876	-2.18451	-0.8238	-3.54526	-3.16745	-0.85509	-3.20055	-2.11269	-1.59537	-1.11405	-2.42617	-2.226	-2.74133	-0.687	-1.24468	-0.98729	1.30506	-1.2241	-3.47337	-2.8821	-3.05025	-2.54263	-2.51809	-1.65923	-0.69273	-3.43176	-4.51288	-2.61114	-2.38958	-2.83007	0.708665
hsa-mir-134	-3.04679	-3.16861	-2.74261	-0.57798	-2.13891	-3.16326	-3.95827	-2.34685	-4.01191	-3.0705	-3.45364	-2.46059	-2.3999	-0.84742	-1.44505	-2.6952	-2.76904	-2.08143	-2.3083	-2.39922	-2.90625	0.01439	-2.23398	-1.37984	-3.1375	-1.40035	-0.25166	-2.20833	-2.94672	-2.36759	-2.00571	-3.22795	-3.26316	-2.48541	-2.86987	-3.90315	-2.69773	-3.7852	-1.81884	-3.35084	-3.27606	-3.62418	-2.89402	-0.73373	-2.27902	-3.03629	-2.74001	-2.53619	0.137904
hsa-mir-135a-1	-3.7169	-3.41228	-2.80795	-0.56647	-2.54868	-3.20456	-3.96337	-2.43417	-4.00359	-3.0705	-3.45364	-2.9674	-4.01043	-1.22363	-2.73737	-2.98329	-2.74658	-3.34351	-2.86534	-3.20248	-3.40362	-0.42524	-2.8899	-1.37984	-3.20055	-2.26044	0	-2.34775	-2.10885	-2.33363	-2.11757	-3.22795	-3.4968	-3.1467	-3.91625	-3.90315	-2.82128	-3.59518	-2.19115	-3.92938	-3.36612	-3.61877	-2.08357	-0.29353	-1.91435	-2.45085	-2.9392	-2.22472	0.273634
hsa-mir-135b	1.71843	-3.41228	3.28142	2.17061	1.1495	-1.64698	-0.09505	-0.44294	2.55749	0.03782	2.0305	-0.57351	-2.98208	2.1473	-3.63916	-0.00553	-3.05088	0.64924	1.78583	2.69933	2.02706	-3.54526	-3.16745	-0.40905	-3.20055	3.35173	-2.23835	0.58912	-0.88121	-2.38382	-0.37409	-1.62176	-1.95904	0.69719	-3.91625	-3.90315	2.73348	1.21524	-1.11928	-1.58082	-1.95127	-0.70044	-0.26321	-0.52451	0.21271	-1.97289	-1.03971	-0.42048	0.0391377
hsa-mir-136	-3.90913	-3.41228	-3.64656	-3.61457	-3.39764	-3.45342	-4.11624	-3.68703	-4.28534	-3.0705	-3.45364	-3.52926	-0.71261	-2.67746	-0.53972	-1.44721	-2.5561	0	-3.26599	-1.44232	-4.38761	-3.54526	-3.16745	-1.37984	-3.20055	-2.26044	-4.2572	-3.97961	-3.67336	-2.60742	-4.65498	-3.22795	-3.06724	-3.60636	-1.07741	-3.90315	-4.02758	-3.7852	-3.66053	-3.92938	-3.36612	-3.62418	-2.89402	-1.86418	-4.51288	-3.49615	-4.54925	-3.162	0.0895657
hsa-mir-137	-4.00187	-3.41228	-3.64656	-3.61457	-3.39764	-3.45342	-4.11624	-3.68703	-0.54348	-3.0705	-3.45364	-3.4852	0.84689	-0.21484	0.49122	-3.09348	-0.42055	-1.48061	-1.65545	-3.20248	-4.38761	-3.54526	-3.16745	-1.37984	-3.20055	-2.14848	-0.12836	-3.97961	-3.67336	-2.60742	-3.30559	-3.0501	-0.7733	-3.60636	-3.91625	1.91483	-4.02758	-3.7852	-3.66053	-3.92938	-3.36612	-3.62418	-2.89402	-3.96246	-0.13899	-3.49615	0.16349	-3.162	0.0973321
hsa-mir-138-1	-4.00187	-3.41228	-3.64656	-3.61457	-3.39764	-3.45342	-4.11624	-3.68703	-3.90618	-3.0705	-3.45364	-0.05179	-1.98769	-3.80239	-1.31722	-3.09348	-3.86184	-2.74749	-1.22365	-2.64001	-4.38761	-3.54526	-3.16745	-1.37984	-3.20055	-2.26044	-4.21612	-2.35666	-3.50948	-2.60742	-3.61174	-3.22795	-1.40112	-3.60636	-3.91625	-3.90315	-3.5218	-3.7852	-1.51284	-3.92938	-3.36612	-1.89167	-2.89402	-3.8447	-1.8025	-1.89109	-2.86674	-2.84822	0.0183166
hsa-mir-138-2	-4.00187	-3.41228	-3.64656	-3.61457	-3.39764	-3.45342	-4.11624	-3.68703	-3.90618	-3.0705	-3.45364	-0.05179	-1.98769	-3.80239	-1.31722	-3.09348	-3.86184	-2.74749	-1.22365	-2.64001	-4.38761	-3.54526	-3.16745	-1.37984	-3.20055	-2.26044	-4.21612	-2.35666	-3.50948	-2.60742	-3.61174	-3.22795	-1.40112	-3.60636	-3.91625	-3.90315	-3.5218	-3.7852	-1.51284	-3.92938	-3.36612	-1.89167	-2.89402	-3.8447	-1.8025	-1.89109	-2.86674	-2.84822	0.0183166
hsa-mir-139	-4.00187	-3.41228	-3.64656	-3.61457	-3.17523	-3.45342	-4.11624	-3.68703	-4.28534	-3.0705	-3.45364	-3.52926	-4.41023	-2.28972	-3.63916	-2.29601	-3.86184	-4.30556	-3.69773	-3.20248	-3.74476	-2.03889	-2.78434	-1.37984	-3.20055	-2.26044	-2.1164	-2.91698	-3.67336	-2.60742	-1.94624	-3.22795	-3.4968	-3.60636	-3.91625	-3.90315	-2.32833	-3.7852	-2.95235	-3.92938	-3.36612	-3.62418	-2.89402	-2.23849	-2.77669	-3.49615	-3.00001	-3.162	0.0326821
hsa-mir-140	-1.54508	-2.09381	-2.42865	-1.67017	-1.35724	0.04226	-1.98439	-1.34739	-2.3477	-2.79473	-3.45364	-0.22316	0.28881	0.93274	-0.97167	-0.07609	0.99139	0.8876	-0.0619	-0.70453	0.14324	-0.10542	1.59307	-0.60048	-0.0373	-0.85072	-1.25193	0.00273	1.32508	-0.12589	1.4271	-0.54939	0.16164	-0.56881	-0.62518	-2.56614	-0.37347	-1.41566	-0.15579	-0.29643	-1.00524	-1.34643	-0.01701	0.15238	-0.89052	-0.69216	0.3137	-1.08842	1.08332e-06
hsa-mir-140	-1.77372	-2.15371	-2.77585	-1.99719	-1.27406	-0.29284	-2.32689	-1.42933	-2.29634	-3.0705	-3.32802	-0.15097	0.83759	0.32569	-1.16133	0.09546	1.53183	1.28476	0.27743	-0.63128	-0.05762	-0.245	1.1268	0.22966	0.68238	0.06592	-1.35775	-0.32572	1.92391	0.59203	1.18238	0.16094	0.6543	-0.21809	-0.89777	-1.48433	-0.73638	-1.01014	-0.61394	0.24863	-0.58719	-0.46362	0.21771	-0.09726	-1.37507	-0.01514	0.22963	-0.30958	3.83538e-09
hsa-mir-141	5.1183	3.67643	5.41218	5.27762	4.52304	5.02146	4.60557	5.36282	6.28681	2.17999	4.84523	-3.52926	-4.41023	-3.80239	-3.63916	-3.09348	-3.86184	-4.30556	-3.67884	-3.20248	-2.01397	-3.47839	-3.16745	-1.37984	-3.20055	-2.26044	-4.2572	-3.97961	-3.67336	-2.60742	-4.65498	-3.22795	-3.40109	-3.58964	-3.13137	-3.90315	1.85369	4.44604	-3.54663	-3.08188	-3.36612	-3.62418	-2.89402	-3.96246	-4.51288	-3.49615	-4.54925	-3.162	8.60127e-19
hsa-mir-141	-2.50568	-3.41228	-2.39275	-2.09972	-3.07152	-2.19227	-3.20643	-1.80816	-1.72951	-3.0705	-3.45364	-3.52926	-4.41023	-3.80239	-3.63916	-3.09348	-3.86184	-4.30556	-3.69773	-3.20248	-4.38761	-3.54526	-3.16745	-1.37984	-3.20055	-2.26044	-4.2572	-3.97961	-3.67336	-2.60742	-4.65498	-3.22795	-3.4968	-3.60636	-3.91625	-3.90315	-4.02758	-3.7852	-3.66053	-3.92938	-3.36612	-3.62418	-2.89402	-3.96246	-4.51288	-3.49615	-4.54925	-3.162	6.07242e-05
hsa-mir-142	-4.00187	-3.41228	4.71984	-1.08713	-3.39764	-2.91905	-1.80439	-3.68703	-4.28534	-3.0705	-3.45364	-2.08609	-4.41023	-3.80239	-3.63916	-3.09348	-3.86184	-4.30556	-3.69773	-3.20248	4.5147	6.49057	7.36607	5.35529	7.24551	5.76911	1.15814	-3.97961	-3.67336	-2.60742	-4.65498	-3.22795	-3.4968	1.99024	-3.91625	-3.90315	-4.02758	-2.47528	1.40566	-1.16141	-3.36612	-3.62418	-2.89402	-3.96246	-4.51288	-3.49615	-4.54925	-3.162	0.490778
hsa-mir-142	-4.00187	-3.41228	1.47648	-3.61457	-3.39764	-3.45342	-4.11624	-3.68703	-4.28534	-3.0705	-3.45364	-3.52926	-4.41023	-3.80239	-3.63916	-3.09348	-3.86184	-4.30556	-3.69773	-3.20248	1.18935	3.61758	4.25833	2.0818	4.54621	2.87662	-2.13436	-3.97961	-3.67336	-2.60742	-4.65498	-3.22795	-3.4968	-1.46896	-3.91625	-3.90315	-4.02758	-3.7852	-1.85749	-3.92938	-3.36612	-3.62418	-2.89402	-3.96246	-4.51288	-3.49615	-4.54925	-3.162	0.393972
hsa-mir-145	-4.00187	-3.41228	-3.64656	-3.61457	-0.32258	-3.45342	-4.11624	-3.68703	-4.28534	-3.0705	-0.14056	-3.52926	3.66844	-3.80239	-3.63916	-3.09348	2.53851	1.47337	-3.69773	-3.20248	-4.38761	-3.54526	-3.16745	-1.37984	-3.20055	-1.16599	-4.2572	-3.97961	-3.67336	-2.60742	-0.8375	-3.22795	-3.4968	-3.60636	-3.91625	-3.90315	-3.80694	-3.7852	-3.66053	-3.92938	-3.36612	-3.62418	-2.89402	-3.96246	-4.51288	-3.49615	-2.87052	-3.162	0.76173
hsa-mir-146a	-4.00187	-3.41228	1.86752	-3.61457	-3.39764	-3.45342	-4.11624	-3.68703	-4.28534	-2.64923	-3.45364	1.12017	0.66286	0.17007	-3.63916	0.41684	-3.59952	-0.51395	-3.69773	-3.20248	-4.10151	-3.51868	0.61649	-1.37984	-3.20055	-2.26044	4.21388	4.34514	5.06652	4.397	3.12471	4.81076	-2.15137	1.70105	-2.82734	-3.90315	0.07235	0.2491	-3.66053	-3.92938	-3.36612	-0.98071	-2.70047	-3.96246	0.80506	1.08016	-2.73732	0.24274	0.0120169
hsa-mir-146b	-3.30826	-3.00647	-3.64656	-1.84794	-3.39764	-3.39193	-4.11624	-3.68703	-4.28534	-3.0705	-3.45364	-3.52926	-4.41023	-3.55867	-3.63916	-3.09348	-1.74108	-3.49726	-3.69773	-3.20248	-3.55183	-2.55678	-2.73409	3.53023	-0.75169	0.10539	-3.79255	-3.41431	-3.67336	-2.60742	-4.65498	-3.22795	-3.19096	-2.01153	-3.09041	-3.90315	-4.02758	-3.7852	-3.66053	-3.92938	-3.36612	-3.62418	-2.89402	-3.96246	-4.51288	-3.49615	-2.60557	-3.162	0.469947
hsa-mir-148a	2.30675	2.95802	2.61	0.31765	0.24901	2.5861	-4.11624	0.39108	0.05893	-0.47567	0.64256	-0.14502	-4.41023	-3.80239	0.67873	-3.09348	1.89104	0.7143	-2.04197	0.05705	1.05074	0.40612	3.15662	1.04241	4.11427	2.13443	-4.2572	0.18556	1.94091	2.32972	2.02265	-3.22795	-0.04887	-3.60636	-0.83983	-3.89353	-0.77109	-0.47286	-1.47113	0.21607	-3.36612	-2.37837	0.90792	-1.02531	-1.13436	-1.87703	-4.54925	-2.07012	0.080113
hsa-mir-148b	1.04422	2.65627	0.1706	-0.75088	0.57405	0.16384	-0.22895	0.18234	1.13051	0.44241	0.028	-0.0597	-0.38109	-0.39979	-0.43833	-1.05037	-0.33083	-1.03166	-0.81044	-0.53886	-0.02905	-0.22104	1.09401	-0.66606	0.72472	0.19377	-0.52128	-0.56545	-0.09994	-0.89643	0.38279	-1.29565	-0.58261	-0.29728	1.32025	0.09062	0.35339	-0.06244	-0.72977	-0.38426	0.34455	-0.25757	-1.77668	-0.66531	-0.29816	-0.67547	-0.0756	-0.98021	0.00137591
hsa-mir-149	-2.16606	1.47165	-3.64656	-3.61457	-0.5754	-0.71171	-2.78775	-3.67402	0.41961	-0.4218	-0.16783	-2.01698	-1.90952	-2.55355	-0.31599	-1.17757	-1.94186	-1.88326	-0.02931	-1.47651	-1.09323	-3.54526	-3.16745	-0.90381	-3.20055	-2.26044	-4.2572	-3.13096	-3.35348	-2.60742	-1.84064	-3.07034	0.11996	-1.12047	-1.8763	0.71455	-0.13798	-0.45396	-0.60415	-0.5989	-1.72858	-1.93473	-1.05501	-2.63154	-3.31874	-1.28072	-0.18171	-0.79157	0.596387
hsa-mir-150	-4.00187	-3.41228	-3.64656	2.09371	-3.39764	-3.45342	-4.0128	-3.68703	-4.28534	-3.0705	-3.45364	-3.52926	-4.41023	-3.80239	-3.63916	-3.09348	-3.86184	-4.30556	-3.69773	-3.20248	-4.38761	-0.98773	-3.16745	-1.25125	-2.85976	1.24782	-4.2572	-3.97961	-3.67336	-2.60742	-4.61841	-3.22795	-3.4968	-3.60636	-3.91625	-3.35423	-4.02758	-3.7852	-3.66053	-3.92938	-3.36612	-3.62418	-2.89402	-3.96246	-4.50589	-3.49615	-4.54925	-3.162	0.493195
hsa-mir-150	-2.43992	-2.96781	-2.51161	-0.58555	-1.48658	-2.3573	-3.60854	-2.38585	-3.53399	-3.0705	-3.37113	-2.49273	-3.30573	-0.48515	-1.65148	-2.50259	-2.66952	-2.91619	-2.42713	-2.49353	-2.41552	0.64052	-1.82297	-1.37984	-3.18994	-1.50643	0.47636	-1.89008	-2.48028	-2.15289	-1.22148	-2.94057	-3.01819	-2.20875	-3.65809	-3.77039	-2.06028	-3.36205	-1.22365	-2.97524	-2.81328	-3.46188	-1.76825	0.03136	-1.69027	-2.71606	-1.95344	-2.00041	0.23445
hsa-mir-151	0.20999	0.2906	-0.16022	-0.45641	0.58553	-0.17988	1.68663	0.2528	1.46004	-0.09914	1.01167	0.65073	0.40594	0.02151	0.53389	-0.0934	-0.09776	-0.78607	-0.04402	-0.58706	-0.91568	-3.54526	-3.16745	-0.17335	-3.20055	-2.26044	0.29906	-0.34678	-0.11185	-0.08866	-0.6264	-0.02238	0.88272	-0.04787	1.75236	0.03911	-0.08927	0.62017	0.73108	1.4438	0.7614	0.7447	0.16237	-0.37654	0.83683	0.69092	0.37018	0.53875	0.146423
hsa-mir-151	1.75102	1.85157	1.35827	1.51696	1.94611	0.96174	3.21262	1.93979	2.9257	1.34749	2.41402	2.15036	2.07327	1.62624	2.06843	1.3088	1.61112	1.09389	1.63941	1.05401	0.51063	-3.54526	-3.16745	1.36388	-3.20055	-2.26044	1.76524	1.20933	1.47769	1.53323	0.63874	1.5183	2.36913	1.43544	3.39939	1.41801	1.37676	1.90817	2.40319	2.98276	2.29811	1.97868	1.67603	1.31195	2.32953	1.80796	2.00827	2.28526	0.170826
hsa-mir-152	-2.18375	-0.69741	-3.64656	-3.61457	-3.39764	-2.36456	-4.05323	-3.68703	-4.12	-2.7554	-3.45364	-2.53857	-0.02152	-3.77957	-2.60148	-0.61671	0.11109	-0.81477	-3.38056	-1.986	-3.22217	-3.54526	-3.16745	-1.37984	-3.20055	-0.91508	-4.2572	-3.57793	-3.67336	-1.87303	-1.13051	-3.22795	-1.36058	-3.60636	-1.96553	-3.60746	-4.02758	-3.7852	-2.27929	-2.00968	-3.36612	-1.57734	-0.91149	-3.04861	-1.56231	-1.21755	0.15134	-1.82294	0.0630987
hsa-mir-153-1	-4.00187	-3.41228	-2.17064	-3.61457	-2.15364	-3.45342	-4.11624	-3.68703	-4.28534	-3.0705	-3.45364	-3.52926	-4.41023	-3.80239	-3.63916	-3.09348	-3.86184	-4.09823	-2.68615	-3.20248	-0.54579	-0.59761	-3.16745	-1.37984	0.79342	-1.77223	-4.2572	-3.97961	-3.67336	-2.60742	-4.65498	-3.22795	-3.4968	-3.60636	-1.90167	-3.90315	-4.02758	-3.7852	-1.43359	-1.70608	-2.32238	-3.62418	-2.89402	-3.96246	-4.51288	-3.49615	-3.2708	-3.162	0.359707
hsa-mir-153-2	-4.00187	-3.41228	-2.17064	-3.61457	-2.15364	-3.45342	-4.11624	-3.68703	-4.28534	-3.0705	-3.45364	-3.52926	-4.41023	-3.80239	-3.63916	-3.09348	-3.86184	-4.09823	-2.68615	-3.20248	-0.54579	-0.59761	-3.16745	-1.37984	0.79342	-1.77223	-4.2572	-3.97961	-3.67336	-2.60742	-4.65498	-3.22795	-3.4968	-3.60636	-1.90167	-3.90315	-4.02758	-3.7852	-1.43359	-1.70608	-2.32238	-3.62418	-2.89402	-3.96246	-4.51288	-3.49615	-3.2708	-3.162	0.359707
hsa-mir-154	-4.00187	-3.41228	-3.64656	-3.61457	-3.39764	-3.45342	-4.11624	-3.68703	-4.28534	-3.0705	-3.45364	-3.52926	-2.22977	-3.60225	-1.88999	-3.09348	-3.7524	-1.2388	-3.69773	-2.8697	-4.38761	-3.54526	-3.16745	-1.19742	-3.20055	-2.26044	-4.2572	-3.97961	-3.67336	-2.60742	-4.65498	-3.22795	-3.4968	-3.60636	-2.14755	-3.39189	-4.02758	-3.7852	-3.66053	-3.92938	-3.36612	-3.62418	-2.89402	-3.21271	-4.48169	-3.49615	-4.54925	-3.162	0.211354
hsa-mir-154	-4.00187	-3.41228	-3.64656	-3.61457	-3.39764	-3.45342	-4.11624	-3.68703	-4.28534	-3.0705	-3.45364	-3.52926	-1.01086	-2.9659	-0.33781	-2.21999	-2.98164	-0.54777	-3.69773	-1.85279	-4.38761	-3.54526	-3.16745	-1.37984	-3.20055	-2.26044	-4.2572	-3.97961	-3.67336	-2.60742	-4.65498	-3.22795	-2.92345	-3.60636	-0.05004	-3.90315	-4.02758	-3.7852	-3.66053	-3.92938	-3.36612	-3.62418	-2.89402	-2.46418	-4.51288	-3.48853	-4.54925	-3.162	0.113278
hsa-mir-155	-4.00187	-3.41228	-3.64656	-2.00114	-3.39764	-0.41599	-4.04281	0.03915	-4.28534	-1.9519	-3.45364	-3.52926	0.84915	1.15878	1.86228	1.58358	0.7387	1.06011	-3.27853	0.24205	-4.38761	2.01657	0.94985	-1.37984	2.79001	-2.26044	3.29318	1.82314	-3.67336	-2.60742	-4.16935	-0.21219	0.10622	1.34117	-3.17844	-3.90315	-4.02758	0.04008	1.58713	1.15165	-3.36612	3.01227	0.56877	1.35769	1.69056	3.26064	-1.85779	2.41043	0.00175438
hsa-mir-15a	2.53438	3.16005	3.74296	3.04012	1.02543	2.35839	1.94191	2.83151	2.32941	0.37704	2.28968	3.11117	2.30521	2.18101	2.35278	2.04508	2.63903	1.66586	3.34871	2.1016	2.13305	4.16457	3.82709	2.26033	5.17336	2.9501	1.38641	1.85423	1.94475	2.41313	0.47809	2.20159	2.59404	2.77887	2.00025	0.55817	2.05708	2.28243	2.37666	2.4453	2.81107	1.96002	2.36042	1.10379	0.89414	2.82116	1.62405	3.49687	0.967281
hsa-mir-15a	-3.95335	-3.41228	-3.13464	-3.61457	-3.39764	-2.95922	-4.11624	-3.60055	-4.28534	-3.0705	-3.45364	-3.52926	-4.41023	-3.80239	-3.63916	-3.09348	-3.82559	-4.30556	-3.34813	-3.20248	-3.97921	-1.9732	-2.89467	-1.37984	-1.59892	-2.26044	-4.2572	-3.85984	-3.67336	-2.60742	-4.65498	-3.22795	-3.4968	-3.60636	-3.91625	-3.88447	-3.97465	-3.69505	-3.66053	-3.92938	-3.36612	-3.62418	-2.89402	-3.96246	-4.51288	-3.49615	-4.34875	-3.06661	0.80479
hsa-mir-15b	4.57497	5.95758	4.85269	3.73925	3.12927	4.23371	3.32982	4.5838	4.62508	5.74764	5.60861	4.54306	4.56139	3.90721	3.95355	4.23262	4.95177	4.31053	4.76217	4.55803	3.53813	4.72098	4.74627	4.80333	6.23338	4.73134	3.32263	3.67294	4.69443	4.99289	3.31977	4.77463	4.73872	4.99937	4.77235	4.15614	3.43352	5.50869	3.8707	4.37803	4.76141	4.81153	3.68744	2.72649	3.35736	5.03981	4.0718	5.18877	0.497819
hsa-mir-15b	-2.97922	-1.68948	-2.81707	-3.61457	-3.39764	-2.70521	-4.10468	-3.46251	-3.61346	-3.0705	-3.4252	-3.02703	-3.09406	-3.76183	-3.40109	-2.94053	-2.56777	-3.41956	-2.67046	-2.3369	-3.14712	-1.88224	-2.18804	-1.37984	-2.50065	-2.26044	-3.89248	-2.69749	-3.67336	-2.60742	-3.41902	-3.22795	-2.79188	-3.0762	-3.23923	-3.47089	-3.35827	-3.38857	-2.68978	-3.92938	-3.24013	-3.62418	-2.89402	-3.72066	-2.79966	-3.49615	-2.1049	-3.162	0.415669
hsa-mir-16-2	5.04204	6.00679	5.82203	5.06207	4.07865	4.93588	4.27069	5.09263	4.8395	4.91502	5.14611	5.28915	4.9282	4.41888	4.64701	4.81038	5.47981	4.53325	5.57595	4.89099	4.37778	5.88259	5.87738	5.04863	7.16274	5.2908	3.99166	4.52175	4.87382	5.16732	3.3662	5.08594	5.26066	5.54217	4.71564	3.98627	4.16019	5.33495	4.62908	4.78634	5.13561	4.74358	4.58857	3.57922	3.73144	5.23884	4.60765	5.60513	0.581011
hsa-mir-16-1	5.04204	6.00679	5.82203	5.06207	4.07865	4.93588	4.27069	5.09263	4.8395	4.91502	5.14611	5.28915	4.9282	4.41888	4.64701	4.81038	5.47981	4.53325	5.57595	4.89099	4.37778	5.88259	5.87738	5.04863	7.16274	5.2908	3.99166	4.52175	4.87382	5.16732	3.3662	5.08594	5.26066	5.54217	4.71564	3.98627	4.16019	5.33495	4.62908	4.78634	5.13561	4.74358	4.58857	3.57922	3.73144	5.23884	4.60765	5.60513	0.581011
hsa-mir-16-2	-1.98726	-1.12445	-1.97244	-2.34513	-2.44115	-1.87952	-3.37121	-1.94585	-2.40348	-2.30803	-1.69605	-1.71775	-1.87309	-2.80074	-2.03795	-1.25786	-1.10635	-2.28021	-1.07815	-1.10679	-2.19977	-1.06114	-1.23039	-1.31864	-0.94439	-1.74162	-2.55587	-1.1996	-2.73622	-2.45734	-3.05186	-1.64579	-1.34631	-1.07256	-2.58543	-2.70901	-2.71106	-1.91209	-1.80789	-3.49569	-2.2706	-2.46418	-2.83797	-1.89033	-2.07791	-2.00884	-0.87092	-1.81398	0.364777
hsa-mir-17	2.77909	3.20584	5.06937	4.56758	3.32337	4.0343	3.93947	4.60957	3.5688	3.64885	3.6265	3.45675	2.09164	3.18182	1.91454	2.32383	2.94023	2.23943	2.75814	2.63065	4.26266	4.94112	5.24687	7.17925	6.54527	5.38125	3.7465	3.28555	2.57996	2.45805	2.39365	4.33683	3.75051	3.27418	2.53117	4.50663	3.16319	3.91627	3.8309	4.16047	4.41246	2.62323	2.53041	2.10281	2.41651	3.53619	2.15023	4.05786	0.353246
hsa-mir-17	-1.38355	-1.13766	0.91603	0.92984	-0.80641	0.30539	0.01991	0.4721	-0.69894	-1.52261	-0.85428	-0.6597	-1.73191	-0.4171	-1.77453	-1.27484	-0.48345	-1.69661	-0.96306	-1.17818	0.66722	1.13106	1.50676	3.28148	2.2374	1.02352	0.39318	-0.53055	-1.98959	-1.91511	-1.37986	-1.04656	-0.04732	-0.76164	-1.70439	-1.63283	-0.6442	-0.56217	0.20141	-0.42326	0.30873	-2.02221	-2.01541	-1.33793	-1.12585	-1.03941	-1.15026	-0.41476	0.568324
hsa-mir-181a-1	2.30886	1.79662	0.90672	-1.16848	-0.45059	-1.27386	1.83441	0.94777	2.97172	0.36357	0.62924	2.48021	1.31881	-0.98064	1.37873	1.41698	1.65981	1.77384	2.17262	1.65446	0.73332	4.17882	4.40022	-1.37984	4.55334	1.23161	1.31146	1.03427	3.31303	0.98991	1.18428	0.55959	2.36292	2.10947	1.16098	1.43619	-2.54957	0.57788	0.43305	1.65809	0.83262	0.43678	1.25637	1.82377	1.85118	0.88503	0.44999	1.93505	0.221206
hsa-mir-181a-2	2.30886	1.79662	0.90672	-1.16848	-0.45059	-1.27386	1.83441	0.94777	2.97172	0.36357	0.62924	2.48021	1.31881	-0.98064	1.37873	1.41698	1.65981	1.77384	2.17262	1.65446	0.73332	4.17882	4.40022	-1.37984	4.55334	1.23161	1.31146	1.03427	3.31303	0.98991	1.18428	0.55959	2.36292	2.10947	1.16098	1.43619	-2.54957	0.57788	0.43305	1.65809	0.83262	0.43678	1.25637	1.82377	1.85118	0.88503	0.44999	1.93505	0.221206
hsa-mir-181a-1	-1.45207	-2.59434	-3.50617	-3.61457	-2.8831	-3.45342	-2.0423	-2.30644	-1.60834	-3.0705	-3.45364	-0.76657	-1.81218	-3.80239	-2.53167	-1.27448	-2.19695	-1.97911	-1.54369	-1.5121	-2.27602	1.80985	0.90765	-1.37984	1.5612	-1.61471	-1.48539	-1.27632	-1.34917	-2.60742	-1.70036	-2.14984	-1.18549	-1.03281	-2.99626	-3.90315	-4.02758	-3.30019	-3.66053	-2.94293	-3.36612	-2.91008	-2.87276	-1.59482	-0.59268	-2.68737	-4.02473	-1.7424	0.0819385
hsa-mir-181a-2	-3.88963	-3.38581	-3.64656	-3.61457	-3.3791	-3.45342	-4.08746	-3.68703	-2.80019	-3.0705	-2.29668	-3.26378	-2.04483	-3.03178	-1.28724	-1.78237	-1.44359	-1.43307	-0.48484	-0.70003	-2.4717	-1.4226	-3.12726	-1.37984	-0.52338	-2.26044	-2.42566	-1.48573	-2.47113	-2.60742	-4.49121	-2.84168	-2.28373	-3.60636	-3.91625	-1.15718	-4.02758	-3.7852	-1.55264	-2.81266	-3.01912	-2.09047	-2.82052	-1.59373	-1.81521	-2.6453	-1.64676	-2.16092	0.000759601
hsa-mir-181b-1	2.06024	1.65971	0.26204	-1.25339	-0.96897	-1.88942	0.38969	0.2579	1.90869	0.19127	0.06867	1.74925	0.83028	-0.8874	0.90386	1.30222	1.24945	0.96278	2.10548	1.4652	0.67938	3.9214	3.59566	-0.65355	3.51009	0.91023	1.11935	1.03441	2.30851	1.05798	1.12726	0.34748	1.47594	1.04359	0.63218	0.96333	-2.26629	0.23958	0.63193	0.94713	0.14767	0.7464	0.68168	1.80545	1.6719	0.86519	0.76846	0.81077	0.0431819
hsa-mir-181b-2	2.06024	1.65971	0.26204	-1.25339	-0.96897	-1.88942	0.38969	0.2579	1.90869	0.19127	0.06867	1.74925	0.83028	-0.8874	0.90386	1.30222	1.24945	0.96278	2.10548	1.4652	0.67938	3.9214	3.59566	-0.65355	3.51009	0.91023	1.11935	1.03441	2.30851	1.05798	1.12726	0.34748	1.47594	1.04359	0.63218	0.96333	-2.26629	0.23958	0.63193	0.94713	0.14767	0.7464	0.68168	1.80545	1.6719	0.86519	0.76846	0.81077	0.0431819
hsa-mir-181c	-2.2898	-3.08381	-3.64656	-3.61457	-3.39764	-3.14919	-3.08187	-3.68703	-2.71167	-1.69171	-3.42726	-2.66358	-2.72817	-2.59106	-1.94256	-3.09348	-2.07137	-2.05322	-1.93732	-3.03941	-0.9403	-0.56924	-0.78732	-1.37984	-0.80969	-2.26044	-3.97541	-3.10486	-3.67336	-2.60742	-4.37103	-3.22795	-1.84644	-3.52717	-3.0399	-1.16918	-4.02758	-3.7852	-3.10913	-3.22708	-3.02743	-3.62418	-2.89402	-2.298	-2.54081	-2.48961	-2.49405	-3.162	0.131224
hsa-mir-181c	-4.00187	-3.41228	-3.64656	-3.61457	-3.39764	-3.45342	-4.11624	-3.68703	-4.28534	-3.0705	-3.45364	-3.52926	-4.41023	-3.80239	-3.63916	-3.09348	-3.86184	-4.30556	-3.69773	-3.20248	-3.2278	-3.4429	-3.16745	-1.37984	-2.60858	-2.26044	-4.2572	-3.97961	-3.67336	-2.60742	-4.65498	-3.22795	-3.4968	-3.60636	-3.91625	-3.18484	-4.02758	-3.7852	-3.66053	-3.92938	-3.36612	-3.62418	-2.89402	-3.96246	-4.51288	-3.49615	-4.54925	-3.162	0.623988
hsa-mir-181d	-0.94709	-0.74737	-1.2965	-1.6459	-1.61616	-1.77827	-2.35772	-2.93478	-1.76029	-1.48763	-1.62687	-0.92653	-1.85503	-0.93875	-1	-0.42525	-1.49308	-1.81428	-0.56978	-0.9997	0.01337	0.70172	0.48584	0.29369	-0.89989	-1.33014	-1.14714	-0.9606	-1.57912	-2.36019	-1.07142	-2.69788	-1.01496	-0.74941	-1.78227	-0.75388	-2.38653	-2.994	-0.27248	-2.01417	-1.52094	-1.15412	-0.51456	0.32281	-0.78477	-1.85676	-0.92613	-2.25236	0.0622796
hsa-mir-182	-0.64991	-1.64485	-2.25253	-1.73518	-1.40373	-1.20101	-2.08065	-2.56638	-2.66326	-2.14401	-1.86137	-2.44159	-3.16936	-2.46001	-3.63916	-2.10452	-3.86184	-2.72199	-1.70655	-1.0365	-0.39144	-3.54526	-3.16745	-1.37984	-2.37618	-2.26044	-3.6435	-3.85912	-3.67336	-2.60742	-4.22835	-3.22795	-3.10294	-2.57595	-0.83258	-0.81797	-1.1426	-3.45313	-1.31141	-3.00125	-0.5734	-3.06067	-2.05317	-1.11468	-2.21957	-3.49615	-2.47994	-2.34942	0.0664228
hsa-mir-182	-3.98522	-3.41228	-3.64656	-3.61457	-3.39764	-3.45342	-3.60972	-3.68703	-4.28534	-3.0705	-3.33519	-3.52926	-4.41023	-3.80239	-3.63916	-3.09348	-3.86184	-4.30556	-3.69773	-3.07657	-3.29787	-3.54526	-3.16745	-1.37984	-3.20055	-2.26044	-4.2572	-3.97961	-3.67336	-2.60742	-4.65498	-3.22795	-3.4968	-3.60636	-3.40036	-3.17992	-3.87521	-3.7852	-3.66053	-3.92938	-3.23595	-3.62418	-2.89402	-3.96246	-4.51288	-3.49615	-4.54925	-3.162	0.808929
hsa-mir-183	1.87261	1.32484	-0.40128	-0.17673	0.35869	0.3985	0.82116	0.11514	0.70435	2.08458	2.00862	0.05654	-0.96022	-1.07093	-2.67907	-1.35344	-2.73015	-0.96499	-0.10552	-0.17808	0.16745	-3.54526	-3.16745	0.53348	1.63067	0.54174	-3.06881	-3.69038	-3.67336	-1.2891	-3.31119	0.10153	-0.34388	-0.03133	2.83401	2.66504	-0.20273	0.1518	-0.9802	1.19549	2.53273	1.61184	1.01142	-1.84208	-2.66598	0.27152	-3.44387	1.50752	0.0160482
hsa-mir-183	-2.45208	-3.12402	-3.64656	-3.61457	-2.42288	-3.16037	-2.27683	-3.58611	-4.28534	-2.89894	-2.05263	-3.52926	-4.41023	-3.64531	-3.63916	-3.09348	-3.86184	-4.30556	-3.37945	-2.19675	-2.34573	-3.54526	-3.16745	-1.37984	-3.20055	-2.26044	-4.2572	-3.97961	-3.67336	-2.60742	-4.65498	-3.22795	-3.4968	-3.60636	-1.5898	-1.87456	-3.04799	-3.7852	-3.02057	-3.92938	-1.40262	-3.21788	-2.53782	-3.88148	-4.30889	-3.49615	-4.54925	-2.69682	0.450637
hsa-mir-185	1.06171	0.20005	0.49307	0.22514	0.45844	-0.13314	1.58831	0.02424	1.18434	0.09893	0.97591	-0.24711	0.68647	-0.47203	-0.48734	0.53465	0.38799	-0.25635	0.0426	0.32314	-0.4219	-0.72523	2.20064	3.32758	1.53993	0.38206	-1.50539	1.63001	1.7423	2.55602	1.1052	2.2434	-0.08616	0.39092	0.21824	0.45931	-0.26667	0.87271	-1.34086	-0.97811	-0.00551	0.21322	-0.01199	-1.34395	-1.35753	0.44997	0.39401	-0.24857	0.503422
hsa-mir-186	-1.9359	-1.50646	-2.06341	-0.53133	-1.04088	-1.52936	-0.7739	-0.94789	-1.07822	-1.4476	-1.69735	-2.08411	-1.48726	-1.19116	-1.89063	-2.27651	-0.49655	-1.19974	-1.45438	-1.24031	-1.76192	-0.83523	0.64256	-1.24109	-1.3464	-1.81767	-1.45417	-0.55314	-1.39798	-0.77379	-2.13828	-2.24093	-2.88298	-1.68106	-0.71483	-1.91978	-0.91414	-2.38341	-1.98789	-2.59361	-0.85933	-2.20018	-2.66082	-2.83547	-1.27922	-1.45827	-2.50997	-1.13632	0.302882
hsa-mir-188	-4.00187	-3.41228	-3.64656	-3.61457	-3.39764	-3.45342	-4.11624	-3.68703	-4.28534	-2.78719	-2.84001	-3.52926	-4.41023	-3.80239	-3.63916	-3.09348	-3.86184	-4.30556	-3.69773	-3.20248	-4.38761	-3.54526	-3.16745	-1.27487	-3.20055	-2.22248	-4.2572	-3.97961	-3.4648	-2.60742	-4.65498	-2.55229	-3.4968	-3.60636	-3.91625	-3.90315	-4.02758	-2.92586	-3.66053	-3.92938	-2.90982	-2.99291	-2.50478	-3.96246	-4.51288	-2.79032	-4.54925	-2.98206	0.77762
hsa-mir-188	-2.90158	-2.35895	-1.27268	0.00823	-2.36004	-2.5772	-2.87006	-1.2239	-3.0303	-2.98496	-3.23104	-0.83115	-1.75986	0.17679	-1.80164	-2.13651	-1.66405	-2.44795	-2.81994	-2.28484	-2.09911	0.86508	-1.32326	-1.15107	-1.08421	0.638	0.23701	-1.66845	-2.04327	-1.7378	-1.11648	-1.75191	-2.63478	-1.8825	-2.12059	-2.07982	-2.02221	-3.32055	-1.47588	-3.69719	-2.29374	-2.84114	-1.08368	-1.50143	-2.85515	-1.7286	-2.20826	-2.75605	0.142428
hsa-mir-18a	0.81383	1.13874	2.32059	2.12741	1.69303	1.69375	1.24838	2.52987	1.9368	0.87337	1.43687	1.62483	0.4021	0.91058	-0.03427	-0.07807	0.81042	-0.30587	0.23409	0.05966	1.91561	2.4851	3.16925	5.60674	3.87318	3.49093	1.36813	0.78075	-0.22142	0.67751	1.03644	0.92213	1.49635	0.82456	0.97139	0.74971	1.66105	1.97522	1.1875	0.94342	1.89741	0.8743	-0.28275	0.17903	0.4691	1.8111	0.15722	1.66855	0.318919
hsa-mir-18b	-0.71726	-0.40826	0.81484	0.64356	0.13016	0.10561	-0.23051	0.93692	0.5889	-0.65137	-0.18021	0.08673	-1.12157	-0.69504	-1.57441	-1.65224	-0.77352	-1.16762	-0.76779	-0.38086	0.338	1.86216	1.70085	4.00214	2.523	1.87124	-0.20282	0.30855	-1.29628	-1.00784	-0.49553	1.93429	-0.08744	-0.73815	-0.32635	2.41204	0.14189	0.372	-0.02312	-0.12006	0.29616	-0.72167	-1.53546	-1.26557	-1.03036	0.13808	-1.3208	0.06861	0.808362
hsa-mir-191	-4.00187	-3.37592	-3.64656	-3.61457	-3.39764	-3.45342	-4.11624	-3.68703	-4.28534	-3.0705	-3.45364	-3.52926	-4.41023	-3.80239	-3.63916	-3.09348	-3.86184	-4.30556	-3.69773	-3.20248	-4.38761	-3.54526	-1.27083	-1.37984	-3.20055	-2.26044	-4.2572	-3.97961	-3.67336	-2.60742	-4.65498	-3.22795	-3.4968	-3.60636	-3.91625	-3.90315	-4.02758	-3.7852	-3.66053	-3.92938	-3.36612	-3.62418	-2.89402	-3.96246	-4.51288	-3.49615	-3.41948	-3.162	0.630745
hsa-mir-191	-3.90796	-2.89774	-3.46734	-3.20465	-2.53998	-2.57968	-4.01631	-3.50873	-4.27151	-2.82087	-3.45364	-3.36054	-4.23881	-3.18455	-2.56099	-2.21065	-3.62523	-4.1044	-3.61386	-1.95754	-3.8931	-2.50201	-2.17616	-1.30129	-3.14202	-2.26044	-3.31536	-2.98853	-3.67336	-2.53053	-4.03013	-3.15926	-3.07251	-3.60636	-3.91625	-3.90315	-3.07223	-3.7852	-2.81288	-3.92938	-3.36612	-3.62418	-2.89402	-3.10953	-3.58993	-3.49615	-3.6225	-3.10037	0.58014
hsa-mir-192	-2.05922	-0.95864	5.20886	5.40736	-3.39764	-0.93499	3.59898	5.10504	-3.42318	-2.77875	-2.45323	-1.84106	-4.12782	-3.80239	-3.63577	-1.03529	-3.86184	-3.67149	-3.33198	-3.20248	2.72081	-3.54526	-3.16745	-0.33806	-2.41392	-2.26044	-3.75322	-2.0306	-3.67336	-2.60742	-3.80948	-1.72711	-1.83784	-1.65758	-2.20826	-1.97378	-1.80298	2.03152	-2.39858	-1.59014	-2.00389	-2.83683	-1.92123	0.48729	-2.61904	-2.4853	-4.36324	1.24051	0.00246533
hsa-mir-192	-4.00187	-3.41228	0.03276	0.08995	-3.39764	-3.45342	-1.73964	-0.08472	-4.28534	-3.0705	-3.45364	-3.52926	-4.41023	-3.80239	-3.63916	-3.09348	-3.86184	-4.30556	-3.69773	-3.20248	-1.9589	-3.54526	-3.16745	-1.37984	-3.20055	-2.26044	-4.2572	-3.97961	-3.67336	-2.60742	-4.65498	-3.22795	-3.4968	-3.60636	-3.91625	-3.90315	-4.02758	-3.48993	-3.66053	-3.92938	-3.36612	-3.62418	-2.89402	-3.96246	-4.51288	-3.49615	-4.54925	-3.162	0.00231597
hsa-mir-193a	1.03432	2.43371	-3.64656	0.94772	-3.35359	-2.74978	-3.61237	-1.14512	0.31901	-3.0705	-1.62617	-0.96259	1.73412	1.08991	-0.27928	0.67199	1.84547	-1.03495	-3.00272	-3.18165	-4.38761	-3.54526	-2.30975	-1.37984	-2.47353	-2.26044	1.85581	0.71457	-0.31076	-0.76552	0.89407	0.22454	1.70199	1.80113	-0.24096	-0.3783	1.18021	-3.15224	1.09674	1.45712	0.24348	1.44	1.91503	-2.13895	0.89331	0.87336	1.25709	1.24309	0.0971485
hsa-mir-193a	-1.71941	-0.24034	-3.64656	-1.71579	-3.39764	-3.45342	-4.11624	-3.68703	-2.29411	-3.0705	-3.45364	-3.52926	-0.47604	-1.11712	-2.59998	-1.41114	-0.08124	-3.12977	-3.69773	-3.20248	-4.38761	-2.89466	-3.16745	-1.37984	-3.20055	-2.26044	-0.68418	-1.38643	-2.97272	-2.60742	-1.75166	-1.63598	-0.35902	-0.41547	-2.74269	-3.27157	-1.34484	-3.7852	-0.97891	-0.58151	-2.0982	-0.49636	0.1919	-3.02134	-1.28061	-0.72213	-1.45599	-0.82762	0.0392947
hsa-mir-193b	2.74972	3.89548	-2.48138	-1.75906	0.62178	1.59928	1.64582	0.55037	3.49506	1.6502	2.31119	0.20142	1.30204	0.10909	0.75297	0.74851	3.03337	1.06527	1.0478	0.59436	-0.92872	-3.54526	-3.16745	1.3195	-3.20055	-1.49949	-4.2572	2.41796	2.3425	1.95566	0.79027	1.71314	2.32135	0.47954	0.38752	-0.03103	1.0829	1.1016	3.25069	4.13306	0.60971	3.36568	4.65074	2.22579	1.53004	3.61304	2.98783	2.67881	0.682022
hsa-mir-193b	-3.82923	-2.86929	-3.64656	-3.61457	-3.39764	-3.45342	-4.11624	-3.68703	-3.41262	-3.0705	-3.45364	-3.52926	-4.20794	-3.27412	-3.63916	-3.09348	-2.78722	-4.30556	-3.69773	-3.20248	-4.38761	-2.60199	-3.16745	-1.37984	-3.20055	-2.26044	-3.79056	-2.84166	-3.67336	-2.60742	-3.92493	-3.22795	-3.27164	-3.60636	-3.91625	-3.90315	-3.76284	-3.7852	-2.43008	-3.2442	-3.36612	-2.91265	-1.56972	-2.98422	-3.45009	-2.16121	-2.99686	-3.02609	0.195217
hsa-mir-194-1	-2.36535	-1.5024	4.76154	4.65541	-3.39764	-1.54216	3.24386	4.90515	-4.20773	-3.0705	-3.45364	-2.94507	-4.41023	-3.80239	-3.63916	-2.13161	-3.86184	-4.25346	-3.69773	-3.20248	2.19465	-3.54526	-3.16745	-1.37984	-3.20055	-2.26044	-4.05155	-2.39132	-3.67336	-2.60742	-4.16205	-3.08584	-2.75072	-2.57473	-3.21147	-3.2922	-2.33155	0.98555	-3.05726	-2.61317	-2.88361	-3.62418	-2.89402	-0.12759	-3.14128	-3.49615	-4.54925	-0.05617	0.00103547
hsa-mir-194-2	-2.36535	-1.5024	4.76154	4.65541	-3.39764	-1.54216	3.24386	4.90515	-4.20773	-3.0705	-3.45364	-2.94507	-4.41023	-3.80239	-3.63916	-2.13161	-3.86184	-4.25346	-3.69773	-3.20248	2.19465	-3.54526	-3.16745	-1.37984	-3.20055	-2.26044	-4.05155	-2.39132	-3.67336	-2.60742	-4.16205	-3.08584	-2.75072	-2.57473	-3.21147	-3.2922	-2.33155	0.98555	-3.05726	-2.61317	-2.88361	-3.62418	-2.89402	-0.12759	-3.14128	-3.49615	-4.54925	-0.05617	0.00103547
hsa-mir-195	0.96909	-0.00704	-2.35347	-3.42415	-3.38982	-2.03324	-4.11624	-3.52566	-4.28534	-2.94888	-3.31996	-2.11315	1.67874	0.00294	-0.24314	-3.08315	-0.68274	-0.32704	-0.81355	-2.47891	-3.4668	-1.77269	-1.8596	-1.37984	-3.20055	-2.26044	-2.07444	-1.90373	-3.67336	-2.60742	-3.41857	0.44496	-2.94692	-2.62096	0.41594	-3.15752	-2.52376	-3.7852	-1.73172	-0.33045	-3.36438	-3.62418	-0.72392	-1.97693	-3.31477	-2.74837	-1.67021	-0.93794	0.171671
hsa-mir-196a-2	2.04252	3.7128	-1.97482	1.23883	-0.43496	0.03057	0.83364	0.02959	-4.28534	-2.10821	-3.45364	-3.52926	0.30636	0.47907	0.15831	0.94441	1.0521	0.14617	0.51615	0.05443	1.15847	-3.54526	-3.16745	-0.9177	-3.20055	0.86772	-3.33494	-0.10787	-1.77731	-1.55866	-0.08349	0.91429	-0.69616	-3.60636	-0.0341	0.35199	-4.02758	-0.40442	0.31894	1.55791	-3.36612	1.54761	0.84262	0.12195	0.08581	0.93126	-1.44403	0.31696	0.757046
hsa-mir-196a-1	2.04252	3.7128	-1.97482	1.23883	-0.43496	0.03057	0.83364	0.02959	-4.28534	-2.10821	-3.45364	-3.52926	0.30636	0.47907	0.15831	0.94441	1.0521	0.14617	0.51615	0.05443	1.15847	-3.54526	-3.16745	-0.9177	-3.20055	0.86772	-3.33494	-0.10787	-1.77731	-1.55866	-0.08349	0.91429	-0.69616	-3.60636	-0.0341	0.35199	-4.02758	-0.40442	0.31894	1.55791	-3.36612	1.54761	0.84262	0.12195	0.08581	0.93126	-1.44403	0.31696	0.757046
hsa-mir-196b	-3.08594	-1.21127	-0.3201	-3.42336	0.18669	-0.79533	0.63958	0.70527	-3.73088	0.67656	-1.74187	-3.52926	-0.46665	-1.90048	-1.86574	-1.82002	0.02382	-1.15156	-3.69773	-1.57929	1.10998	-3.54526	-3.16745	-1.37984	-3.20055	-2.26044	-3.09397	-2.2563	-3.67336	-2.60742	-2.10357	-2.71016	-1.49955	-1.87582	-3.6661	-3.90315	-4.02758	-1.29376	-1.71859	-0.45882	1.32049	2.58535	2.77929	2.0622	0.24193	1.18165	-2.98229	2.06322	0.585153
hsa-mir-197	-0.09672	0.55001	-0.59042	-0.38009	-0.21664	-0.54061	-0.7169	-0.92232	-0.11782	0.4379	1.09377	0.41761	-0.34259	-0.4067	-0.49259	-0.25122	-0.28388	-0.69569	-0.18112	-0.40395	-0.71598	-0.4201	0.33108	2.25047	0.14427	0.5202	-0.95478	-0.70343	1.31624	1.02838	-0.87194	0.24143	-0.45518	0.15484	0.84455	0.38036	-1.11875	-0.13356	0.21881	0.42319	0.70991	1.32398	0.46386	0.00105	-0.94806	0.91608	-1.11676	0.40104	0.478159
hsa-mir-199b	-4.00187	-3.41228	-3.64656	-3.61457	-3.39764	-3.45342	-4.11624	-3.68703	-4.28534	-3.0705	-3.45364	-3.52926	4.86997	-3.80239	-3.63916	-3.09348	5.39062	-4.30556	-3.69773	-2.95022	-4.38761	-3.54526	2.06391	-1.37984	-3.20055	-2.26044	-0.49293	-3.97961	-3.67336	-2.60742	-1.69428	-3.22795	-3.4968	-3.60636	-3.26665	-3.90315	-2.64898	-3.7852	-3.66053	-3.92938	-3.36612	-3.62418	-2.89402	-3.96246	-4.51288	-3.49615	-4.54925	-3.162	0.18872
hsa-mir-199b	-4.00187	-3.41228	-3.64656	-3.61457	-3.39764	-3.45342	-4.11624	-3.68703	-4.28534	-3.0705	-3.45364	-3.52926	-3.58642	-3.80239	-3.63916	-3.09348	-2.70949	-4.30556	-3.69773	-3.20248	-4.29372	-3.16516	2.56803	-1.37984	-3.20055	-2.26044	-4.2572	-3.97961	-3.67336	-2.60742	-1.44331	-3.22795	-3.4968	-3.60636	-3.51963	-3.90315	-4.02758	-3.7852	-3.66053	-3.92938	-3.36612	-3.62418	-2.89402	-3.96246	-4.51288	-3.49615	-4.54925	-3.162	0.351706
hsa-mir-19a	2.50797	2.85089	4.46365	4.52505	3.69725	3.71479	2.93043	4.5225	3.68565	1.81068	3.18808	3.43694	2.25651	2.4873	2.00193	2.35597	2.92476	2.06406	2.94389	2.29011	4.31506	4.52909	5.0978	7.50403	5.80432	5.3666	3.31504	2.97162	2.10494	2.71302	2.4946	2.92432	3.5864	3.66272	2.72533	2.62846	3.20646	3.51827	3.35048	2.89645	4.28716	2.47282	1.98117	2.31447	2.25572	3.34569	2.47314	3.75663	0.623982
hsa-mir-19b-1	3.673	4.00811	5.91004	5.84037	4.17548	4.95855	4.47711	5.54606	4.67961	3.88944	4.55579	4.50065	3.22512	4.00966	3.07803	3.76248	4.13376	3.63875	4.12261	3.82374	5.43865	6.12464	6.39878	8.38893	7.57023	6.51935	4.92152	4.50187	3.73014	3.86336	3.39576	5.29519	4.85855	4.81026	3.61653	5.43873	4.01142	4.69566	4.9435	4.92551	5.59141	3.54593	3.85346	3.69155	3.54555	4.47612	3.7146	5.18167	0.855909
hsa-mir-19b-2	3.673	4.00811	5.91004	5.84037	4.17548	4.95855	4.47711	5.54606	4.67961	3.88944	4.55579	4.50065	3.22512	4.00966	3.07803	3.76248	4.13376	3.63875	4.12261	3.82374	5.43865	6.12464	6.39878	8.38893	7.57023	6.51935	4.92152	4.50187	3.73014	3.86336	3.39576	5.29519	4.85855	4.81026	3.61653	5.43873	4.01142	4.69566	4.9435	4.92551	5.59141	3.54593	3.85346	3.69155	3.54555	4.47612	3.7146	5.18167	0.855909
hsa-mir-19b-1	-3.92441	-3.41228	-2.52601	-2.78519	-3.39764	-2.77069	-3.75719	-2.47167	-3.83642	-3.0705	-3.41469	-3.52926	-4.41023	-3.80239	-3.63916	-3.09348	-3.7388	-4.30556	-3.69773	-3.20248	-2.22442	-1.43552	-1.33781	1.24068	0.11965	-1.2607	-3.30707	-3.83855	-3.67336	-2.60742	-4.54492	-3.22795	-2.61196	-2.90713	-3.91625	-3.90315	-4.02758	-3.65759	-3.19616	-3.67831	-2.32793	-3.62418	-2.89402	-3.78668	-4.08335	-3.49615	-4.20456	-2.88485	0.7655
hsa-mir-200a	2.52635	2.71492	4.58555	4.32375	1.70021	2.54685	4.45454	3.96236	2.6052	1.24848	1.55676	-3.52926	-4.41023	-3.80239	-3.63916	-3.09348	-3.86184	-4.30556	-3.69773	-3.20248	2.21326	-3.54526	-3.16745	-1.37984	-3.20055	-2.26044	-0.6681	-3.97961	-3.67336	-2.60742	-4.65498	-3.22795	-3.4968	-0.45569	-3.91625	-3.90315	0.01776	2.04536	-1.14734	-2.39039	-0.47108	1.43386	-0.28608	1.72264	1.3426	1.89884	-4.54925	1.34283	7.86766e-09
hsa-mir-200a	-2.84092	-2.8054	-0.68162	-0.62698	-3.26079	-2.33934	-1.28452	-0.8372	-2.84004	-2.44438	-3.12982	-3.52926	-4.41023	-3.80239	-3.63916	-3.09348	-3.86184	-4.30556	-3.69773	-3.20248	-3.24082	-3.53343	-3.16745	-1.37984	-3.20055	-2.26044	-4.2572	-3.97961	-3.67336	-2.60742	-4.65498	-3.22795	-3.4968	-3.60636	-3.91625	-3.90315	-4.02758	-2.5005	-3.66053	-3.92938	-3.36612	-2.74933	-2.89402	-3.70514	-4.13199	-2.18657	-4.54925	-2.64969	8.33313e-06
hsa-mir-200b	3.53139	3.94361	6.0695	5.61119	2.54754	3.77514	5.21751	5.50591	3.91529	4.27898	3.66347	-2.19897	-4.27735	-3.80239	-3.63916	-3.09348	-3.86184	-4.30556	-3.69773	-3.20248	3.5509	-3.54526	-3.16745	-1.37984	-3.20055	-2.26044	0.43224	-3.97961	-3.67336	-2.60742	-4.65498	-3.22795	-2.69189	1.26783	-3.91625	-3.90315	1.08706	3.92521	0.0068	-0.2242	1.36111	3.61043	1.97387	2.15897	2.18292	3.89338	-4.54925	3.40522	7.7297e-08
hsa-mir-200b	-2.77484	-2.32655	0.04538	-0.14863	-2.77268	-1.53085	-0.88069	-0.55685	-2.32469	-1.54156	-2.88022	-3.52926	-4.41023	-3.80239	-3.63916	-3.09348	-3.86184	-4.30556	-3.69773	-3.20248	-2.19801	-3.13958	-3.16745	-1.37984	-3.20055	-2.26044	-4.2572	-3.97961	-3.67336	-2.60742	-4.59389	-3.22795	-3.4968	-3.60636	-3.91625	-3.90315	-4.02758	-2.20499	-3.66053	-3.92938	-3.36612	-2.48589	-2.89402	-3.25452	-3.59904	-1.67281	-4.54925	-2.4775	3.27164e-07
hsa-mir-200c	4.2404	2.91884	4.36841	4.44758	3.41654	4.20422	3.72376	4.4146	5.47591	4.04862	3.66999	-3.52926	-4.41023	-3.80239	-3.63916	-3.09348	-3.86184	-4.30556	-3.69773	-3.20248	-3.0422	-3.54526	-3.16745	-1.37984	-3.20055	-2.26044	-4.2572	-3.97961	-3.67336	-2.60742	-4.65498	-3.22795	-3.4968	-3.60636	-3.80881	-3.90315	1.20949	3.60988	-3.66053	-3.92938	-3.36612	-3.62418	-2.89402	-3.96246	-4.51288	-3.49615	-4.54925	-3.162	1.17586e-19
hsa-mir-200c	-3.52296	-3.41228	-3.61393	-3.38696	-3.39764	-2.55743	-3.93895	-3.14063	-3.01425	-3.0705	-3.45364	-3.52926	-4.41023	-3.80239	-3.63916	-3.09348	-3.86184	-4.30556	-3.69773	-3.20248	-4.38761	-3.54526	-3.16745	-1.37984	-3.20055	-2.26044	-4.2572	-3.97961	-3.67336	-2.60742	-4.65498	-3.22795	-3.4968	-3.60636	-3.91625	-3.90315	-4.02758	-3.7852	-3.66053	-3.92938	-3.36612	-3.62418	-2.89402	-3.96246	-4.51288	-3.49615	-4.54925	-3.162	0.158177
hsa-mir-202	-3.24446	-2.9386	-3.18212	-3.08926	-2.28544	-2.14736	-3.62295	-2.22354	-4.18899	-0.42658	-0.17417	-3.28508	-4.34824	-1.68333	-1.85245	-1.91401	-3.34641	-4.21886	-3.16717	-1.83385	-2.04152	-0.45328	-1.34938	0.60672	-1.88904	0.97046	-1.46228	-1.90409	-0.84168	-1.27224	-1.9665	-0.24893	-3.18997	-2.91029	-3.56821	-0.57304	-1.93883	-0.30483	-1.8532	-0.73948	-0.26918	-0.38642	-0.235	-1.06024	-2.25737	-0.28775	-1.81914	-0.00176	0.0454143
hsa-mir-203	3.50705	2.72417	0.80166	2.29766	-0.53888	1.88456	-1.34961	-1.68421	1.16578	-1.0218	0.29666	-3.52926	-4.41023	-3.80239	-3.63916	-3.09348	-3.86184	-4.30556	-3.69773	-3.20248	-1.91323	-3.54526	-3.16745	-1.37984	-3.20055	-2.26044	-4.2572	-3.97961	-3.67336	-2.60742	-4.33459	-3.22795	-3.4968	-3.60636	-2.6083	-3.90315	-4.02758	-2.22993	-1.58311	-1.10371	-3.36612	-3.62418	-2.10547	-3.96246	-4.51288	-3.49615	-4.54925	-3.162	1.23498e-13
hsa-mir-204	-4.00187	-3.41228	-3.64656	-3.61457	-3.39764	-3.45342	-4.11624	-3.68703	-4.28534	-3.0705	-3.13137	-3.24907	-2.94118	-3.80239	-3.63916	-3.09348	-3.86184	0.16583	-0.23183	0.01263	-1.53265	-3.54526	-3.16745	-0.58218	-3.20055	-0.93541	-4.2572	-0.73942	0.55255	1.7425	0.52503	-0.1915	-3.4968	-3.60636	-3.91625	-2.94381	-4.02758	-3.7852	-3.66053	-3.04456	-3.36612	-3.5086	-2.89402	-3.96246	-2.48443	-3.49615	-3.90776	-2.95281	0.0268878
hsa-mir-205	-0.5953	3.30731	-3.64656	-3.61457	-3.39764	-3.45342	4.10285	-3.68703	5.80546	0.13692	-0.28283	-3.52926	-4.41023	-3.80239	-3.63916	-3.09348	-3.86184	-4.30556	-1.50548	-3.20248	-4.38761	-3.54526	-3.16745	-1.37984	-3.20055	-2.26044	-4.2572	-3.97961	-3.67336	-2.60742	-4.65498	-3.22795	-3.4968	-3.60636	-3.91625	-3.90315	-4.02758	-3.7852	-3.66053	-3.92938	-3.36612	-3.62418	-2.89402	-3.96246	-4.51288	-3.49615	-4.54925	-3.162	6.63175e-06
hsa-mir-20a	3.5082	3.7853	5.82077	5.6226	3.9391	4.73653	4.5262	5.34565	4.34266	3.36424	4.3154	4.26415	2.81718	3.68991	2.64723	3.35172	3.64692	2.66022	3.54187	3.03194	4.989	5.57225	6.1352	8.32697	7.5569	6.46495	4.62796	3.90706	3.43142	3.52734	3.02098	4.17765	4.61069	4.39968	3.15496	4.00751	3.83899	4.71697	4.60176	5.01786	5.25074	3.37317	3.4899	3.28817	3.20245	4.30292	3.16659	5.04788	0.562063
hsa-mir-20a	-3.54312	-3.37613	-1.09879	-1.40661	-3.29926	-1.952	-2.45534	-2.24748	-3.15842	-3.0705	-3.45364	-3.22019	-4.37493	-3.59307	-3.63916	-3.09348	-3.21649	-4.12051	-3.10142	-3.20248	-1.19361	-0.71172	-0.32981	0.72714	-0.27083	-1.7704	-1.39796	-2.25222	-3.67336	-2.60742	-3.82104	-3.22795	-2.3117	-2.40861	-3.91625	-3.90315	-2.895	-3.52952	-2.00959	-3.15622	-1.96224	-3.62418	-2.89402	-2.47205	-2.94217	-3.49615	-2.86065	-2.80278	0.914384
hsa-mir-20b	1.52131	1.77052	3.80672	3.59229	2.04222	2.85853	2.26043	2.99069	2.15667	0.48203	1.23183	2.22558	0.77036	1.78276	0.74172	1.4407	1.65835	1.61899	2.22621	2.36394	3.29961	4.61073	4.48275	5.31716	5.07129	3.4284	2.92207	3.08744	1.30482	0.20055	1.30827	4.71058	2.35047	2.1471	1.10389	5.05634	2.16735	1.78666	3.15014	2.70292	2.53931	0.16826	1.05871	1.90989	1.65901	1.19888	1.73178	1.86906	0.807527
hsa-mir-21	7.86104	6.27534	8.09647	6.39359	7.5433	6.79014	6.76897	7.26079	8.08834	4.1821	7.35089	8.33454	7.89805	5.99375	6.79121	9.14771	8.59738	7.49345	9.36524	8.71776	6.3193	2.32666	5.26924	6.99991	4.88885	8.13986	7.0726	7.3562	7.25415	7.51849	6.44463	6.81466	9.19302	8.73959	7.55758	8.28371	6.69025	7.67011	7.5666	8.22026	8.22903	7.26755	8.39747	7.85755	8.30648	5.03033	6.40926	8.89398	0.377198
hsa-mir-21	0.7598	-1.07322	1.24309	-0.10634	1.58796	0.53683	0.65753	1.49198	0.00132	-3.0705	0.11895	1.31152	1.1648	-0.33456	-0.05725	3.01425	1.95498	0.62693	2.90939	3.02908	0.03156	-3.54526	-1.76406	2.22058	-2.16621	1.64525	0.80537	1.3177	-0.37345	0.22877	-0.15769	-0.18669	2.66665	1.96413	0.40252	1.06294	0.13945	0.79895	1.40006	1.04524	1.54691	0.44769	1.10009	1.87678	2.10218	-2.45789	0.04393	2.20315	0.272679
hsa-mir-210	1.46303	1.13818	0.54344	-0.32362	0.43061	0.16357	-0.02799	2.19991	1.66783	-0.31743	-0.47497	1.58326	1.1217	-0.43099	2.54378	-1.00095	1.39114	0.03737	1.03945	1.66389	-1.35446	-2.09262	-3.16745	1.8581	-1.72841	2.95346	0.37259	-0.73904	-1.6667	1.45266	0.1605	-0.16744	0.67884	0.87116	-1.14955	0.3859	2.04324	2.43038	-0.9594	0.17046	1.39328	1.75056	0.93287	-0.62365	0.43245	2.59144	0.85244	1.26245	0.779006
hsa-mir-211	-4.00187	-3.41228	-3.64656	-3.61457	-3.39764	-3.45342	-4.05609	-3.68703	-4.28534	-3.0705	-2.87673	-3.52926	-4.41023	-3.80239	-3.63916	-3.09348	-3.86184	-4.30556	-3.69773	-3.20248	-4.38761	-3.54526	-3.16745	-0.3914	-3.20055	-2.26044	-4.2572	3.24313	-0.38905	4.28898	-3.13839	0.6282	-3.4968	-3.60636	-3.91625	-2.77948	-4.02758	-3.7852	-3.66053	-3.00817	-3.36612	-3.33484	-2.89402	-3.96246	-4.15128	-3.49615	-4.20043	-2.77641	0.239593
hsa-mir-212	-1.6031	-1.45226	-1.29444	-1.3518	-1.13525	-0.9893	-2.02626	-2.19044	-2.92718	-3.0705	-2.39005	-1.31717	-2.62107	-0.98849	-0.33805	-0.5244	-1.81905	-1.99179	-0.5877	0.92811	-1.13333	-0.60922	-0.91233	-1.14206	-2.7825	-2.2265	-1.41541	-0.58983	-3.25242	-2.52511	-1.48997	-2.75338	-2.00461	-2.29865	-0.6568	-2.86153	-1.52885	-2.38389	-1.28209	-3.08137	-1.88725	-2.54491	-2.08695	-0.53436	-1.28549	-1.73009	-0.48517	-1.80932	0.373175
hsa-mir-215	-3.30086	-2.09334	4.04595	4.28399	-3.39764	-1.93758	2.24851	4.52157	-4.28534	-3.0705	-3.45364	-3.06464	-4.41023	-3.80239	-3.63916	-2.15249	-3.86184	-4.30556	-3.69773	-3.20248	1.98847	-3.54526	-3.16745	-1.37984	-3.20055	-2.26044	-3.61633	-2.55542	-3.67336	-2.60742	-4.45219	-3.22795	-3.10363	-2.91447	-3.5835	-3.67809	-2.40421	-0.01551	-3.25124	-3.92938	-3.36612	-3.62418	-2.89402	0.04512	-3.0379	-3.49615	-4.54925	-0.99864	0.00164243
hsa-mir-218-1	-2.13698	-3.41228	-3.64656	-3.61457	-3.39764	-3.45342	-4.11624	-3.68703	-1.06016	-0.14982	0.62973	-1.12386	-1.95734	-0.46032	-1.67696	-1.66929	-3.67148	-3.24293	0.08082	-0.80549	-4.38761	-3.54526	-3.16745	-1.37984	-3.20055	-2.26044	-4.2572	-3.97961	-3.39488	-2.60742	-4.65498	-3.14533	0.25771	-1.91289	-3.91625	-1.55773	-4.02758	-3.7852	-3.66053	-3.61746	-1.38101	-3.62418	-2.89402	-1.94482	-1.91327	-3.49615	-1.9163	-3.162	0.875868
hsa-mir-218-2	-2.13698	-3.41228	-3.64656	-3.61457	-3.39764	-3.45342	-4.11624	-3.68703	-1.06016	-0.14982	0.62973	-1.12386	-1.95734	-0.46032	-1.67696	-1.66929	-3.67148	-3.24293	0.08082	-0.80549	-4.38761	-3.54526	-3.16745	-1.37984	-3.20055	-2.26044	-4.2572	-3.97961	-3.39488	-2.60742	-4.65498	-3.14533	0.25771	-1.91289	-3.91625	-1.55773	-4.02758	-3.7852	-3.66053	-3.61746	-1.38101	-3.62418	-2.89402	-1.94482	-1.91327	-3.49615	-1.9163	-3.162	0.875868
hsa-mir-219-1	0.00105	-0.4043	-2.77638	-1.7989	-0.75746	-2.34819	-1.93443	-1.78147	-3.56597	-3.0705	-2.06605	-1.86408	-2.71226	-3.80239	-3.63916	-1.42374	-2.36906	-2.93466	-3.18198	-3.20248	-1.97609	-2.58768	-2.87086	-1.02492	-0.26307	-1.74318	-2.11947	-1.80435	-3.40011	-2.60742	-3.84857	-1.0667	-1.87265	-1.96966	-1.34362	-0.65184	-2.2775	-2.37617	-2.17767	-1.24625	-2.02041	-2.1348	-2.89402	-1.27395	-3.36397	-2.60575	-1.29986	-2.42522	0.264668
hsa-mir-219-2	0.00105	-0.4043	-2.77638	-1.7989	-0.75746	-2.34819	-1.93443	-1.78147	-3.56597	-3.0705	-2.06605	-1.86408	-2.71226	-3.80239	-3.63916	-1.42374	-2.36906	-2.93466	-3.18198	-3.20248	-1.97609	-2.58768	-2.87086	-1.02492	-0.26307	-1.74318	-2.11947	-1.80435	-3.40011	-2.60742	-3.84857	-1.0667	-1.87265	-1.96966	-1.34362	-0.65184	-2.2775	-2.37617	-2.17767	-1.24625	-2.02041	-2.1348	-2.89402	-1.27395	-3.36397	-2.60575	-1.29986	-2.42522	0.264668
hsa-mir-219-1	0.00105	-0.4043	-2.77638	-1.7989	-0.75746	-2.34819	-1.93443	-1.78147	-3.56597	-3.0705	-2.06605	-1.86408	-2.71226	-3.80239	-3.63916	-1.42374	-2.36906	-2.93466	-3.18198	-3.20248	-1.97609	-2.58768	-2.87086	-1.02492	-0.26307	-1.74318	-2.11947	-1.80435	-3.40011	-2.60742	-3.84857	-1.0667	-1.87265	-1.96966	-1.34362	-0.65184	-2.2775	-2.37617	-2.17767	-1.24625	-2.02041	-2.1348	-2.89402	-1.27395	-3.36397	-2.60575	-1.29986	-2.42522	0.264668
hsa-mir-219-1	0.00105	-0.4043	-2.77638	-1.7989	-0.75746	-2.34819	-1.93443	-1.78147	-3.56597	-3.0705	-2.06605	-1.86408	-2.71226	-3.80239	-3.63916	-1.42374	-2.36906	-2.93466	-3.18198	-3.20248	-1.97609	-2.58768	-2.87086	-1.02492	-0.26307	-1.74318	-2.11947	-1.80435	-3.40011	-2.60742	-3.84857	-1.0667	-1.87265	-1.96966	-1.34362	-0.65184	-2.2775	-2.37617	-2.17767	-1.24625	-2.02041	-2.1348	-2.89402	-1.27395	-3.36397	-2.60575	-1.29986	-2.42522	0.264668
hsa-mir-219-1	0.00105	-0.4043	-2.77638	-1.7989	-0.75746	-2.34819	-1.93443	-1.78147	-3.56597	-3.0705	-2.06605	-1.86408	-2.71226	-3.80239	-3.63916	-1.42374	-2.36906	-2.93466	-3.18198	-3.20248	-1.97609	-2.58768	-2.87086	-1.02492	-0.26307	-1.74318	-2.11947	-1.80435	-3.40011	-2.60742	-3.84857	-1.0667	-1.87265	-1.96966	-1.34362	-0.65184	-2.2775	-2.37617	-2.17767	-1.24625	-2.02041	-2.1348	-2.89402	-1.27395	-3.36397	-2.60575	-1.29986	-2.42522	0.264668
hsa-mir-219-1	0.00105	-0.4043	-2.77638	-1.7989	-0.75746	-2.34819	-1.93443	-1.78147	-3.56597	-3.0705	-2.06605	-1.86408	-2.71226	-3.80239	-3.63916	-1.42374	-2.36906	-2.93466	-3.18198	-3.20248	-1.97609	-2.58768	-2.87086	-1.02492	-0.26307	-1.74318	-2.11947	-1.80435	-3.40011	-2.60742	-3.84857	-1.0667	-1.87265	-1.96966	-1.34362	-0.65184	-2.2775	-2.37617	-2.17767	-1.24625	-2.02041	-2.1348	-2.89402	-1.27395	-3.36397	-2.60575	-1.29986	-2.42522	0.264668
hsa-mir-219-1	0.00105	-0.4043	-2.77638	-1.7989	-0.75746	-2.34819	-1.93443	-1.78147	-3.56597	-3.0705	-2.06605	-1.86408	-2.71226	-3.80239	-3.63916	-1.42374	-2.36906	-2.93466	-3.18198	-3.20248	-1.97609	-2.58768	-2.87086	-1.02492	-0.26307	-1.74318	-2.11947	-1.80435	-3.40011	-2.60742	-3.84857	-1.0667	-1.87265	-1.96966	-1.34362	-0.65184	-2.2775	-2.37617	-2.17767	-1.24625	-2.02041	-2.1348	-2.89402	-1.27395	-3.36397	-2.60575	-1.29986	-2.42522	0.264668
hsa-mir-22	1.63652	2.56206	2.67173	2.5516	1.03051	1.97586	1.67988	2.00762	3.7351	2.998	3.43724	4.6306	4.49147	3.464	4.19734	4.68619	4.02563	3.68285	4.40355	4.11482	0.08878	-2.09152	-2.38827	3.32758	-0.87638	2.5482	3.25108	3.34842	2.6963	4.50097	2.16526	3.13661	4.87801	3.7134	3.55023	2.63388	2.26519	2.95764	3.90623	4.82413	3.66112	4.03988	5.37979	2.98797	2.69583	3.98379	3.27091	4.04797	0.183535
hsa-mir-22	-4.00187	-3.41228	-3.45727	-3.22525	-3.39764	-2.9861	-4.11624	-3.68703	-3.18964	-2.98653	-3.45364	-1.12794	-0.59826	-2.59282	-0.77328	-0.00786	-0.90553	-1.22541	-0.23909	-0.52142	-4.38761	-3.54526	-3.16745	-1.37984	-3.20055	-2.26044	-1.29286	-1.2428	-3.67336	-2.4363	-2.93748	-3.16143	-0.82541	-2.00786	-3.19573	-2.88913	-2.53564	-3.7852	-0.87082	-2.76863	-3.03335	-2.73703	-1.83874	-1.08641	-1.51282	-2.71651	-0.62564	-2.70921	0.000275303
hsa-mir-221	-2.34139	-3.41228	1.7029	1.00766	3.38313	2.46527	2.63074	1.48364	1.97014	3.45309	2.55214	5.1989	3.07363	3.07916	3.92844	3.403	1.00846	2.42223	4.12865	3.66393	2.22703	0.6899	3.73171	-1.37984	0.41955	0.91777	3.25815	3.99331	1.68678	1.34706	2.38954	1.30225	3.75774	3.89746	0.5331	3.82894	2.48019	1.81815	3.56282	1.84488	2.60518	1.82971	-0.37271	2.40629	2.66745	1.06384	3.93478	1.7852	0.074733
hsa-mir-221	-4.00187	-3.41228	-2.46123	-2.36366	-1.48266	-2.29202	-2.34695	-3.02611	-2.61886	-0.43098	-1.71069	0.45441	-1.36134	-2.34841	-1.10349	-1.03724	-2.823	-1.55293	-0.03307	-0.78634	-3.02765	-3.54526	-1.4144	-1.37984	-2.9132	-2.07384	-1.42049	-1.28982	-2.04738	-1.14003	-3.53098	-2.20077	-0.49755	0.04432	-3.91625	-0.52823	-3.12892	-2.22109	-1.93814	-1.93802	-1.29788	-2.65267	-2.89402	-2.49618	-2.94642	-2.71082	-1.1969	-1.81437	0.151588
hsa-mir-222	-4.00187	-3.41228	0.21355	0.92088	1.042	0.10373	0.76752	-0.42974	-1.15819	0.80425	-0.77237	2.19746	0.20524	0.94214	1.42686	1.02722	-0.63792	0.41192	1.57949	1.7625	-0.51372	-1.72196	1.50196	-1.37984	-2.74037	-1.80455	1.76392	1.73548	-0.67647	0.05522	0.01747	-1.50878	0.93922	1.15596	-2.18175	0.36397	0.26616	-0.5321	1.26275	-0.4859	0.04011	-1.64785	-2.39087	0.55253	0.06995	-1.11303	1.91378	-1.10901	0.266062
hsa-mir-224	-4.00187	-3.41228	1.39311	0.30492	-3.10988	-1.24645	2.97589	-3.68703	0.45408	-1.45053	0.30125	0.43366	-0.13246	1.76011	-0.31104	0.11025	-3.86184	-1.31293	-1.83871	-1.70907	-0.46338	-3.54526	-3.16745	2.86299	-3.20055	-2.26044	-4.2572	-3.97961	-3.67336	-2.60742	-4.65498	-3.22795	2.85683	1.48449	-3.71321	-3.90315	-4.02758	0.93167	-3.66053	-3.92938	-3.36612	-3.62418	-2.89402	-3.96246	0.70336	-1.00822	-0.57606	-1.05662	0.285181
hsa-mir-23a	4.07806	3.87051	3.79768	4.02225	4.14035	4.38448	3.92609	3.80242	5.72985	5.37469	5.28572	5.57702	5.51147	5.49812	5.17462	5.97979	4.80306	4.95287	5.60477	5.05477	3.66339	-0.40702	5.51707	2.67348	-1.27977	4.12746	4.96859	5.59219	4.6584	5.02876	4.43012	4.39109	5.41175	5.11559	5.53813	4.80024	3.11488	3.75476	5.59647	5.06196	5.53633	4.16878	5.06609	4.36568	5.35376	4.80408	5.42684	4.51524	0.718904
hsa-mir-23a	-3.43336	-3.33274	-3.62185	-3.23974	-1.93261	-1.92675	-4.09141	-3.67143	-3.72912	-2.84743	-3.0004	-2.84635	-3.03368	-1.72097	-1.88831	-1.08091	-3.09513	-3.69083	-2.66657	-1.62698	-2.22847	-1.37435	-0.91315	-1.37984	-3.20055	-2.26044	-1.29174	-0.95954	-3.67336	-2.60742	-1.54499	-3.21748	-2.78731	-2.81944	-3.32084	-3.90315	-1.52828	-3.7852	-1.43872	-3.77711	-3.00901	-3.4942	-2.61834	-0.79914	-1.27032	-3.28	-1.33208	-3.162	0.0187857
hsa-mir-23b	2.13681	4.34223	4.4993	0.74757	0.66212	2.07314	1.93043	3.5073	3.6574	3.31559	2.36923	3.23636	3.47375	3.12966	2.18218	3.57623	3.81933	4.59987	4.01582	3.9736	3.67772	-0.53199	0.96439	-0.59483	0.12291	0.267	0.38715	1.58285	0.97979	1.62006	2.51384	0.62898	3.3438	2.23549	1.39174	0.26384	3.78876	1.33154	0.70295	0.03026	2.29527	1.98519	2.79834	2.16918	2.90839	1.29726	2.09636	2.75268	0.194386
hsa-mir-23b	-4.00187	-3.13449	-2.62943	-3.61457	-3.39764	-3.45342	-4.11624	-3.59414	-3.67907	-3.0705	-3.45364	-3.52926	-3.84353	-3.80239	-3.63916	-2.96378	-3.08704	-2.80489	-2.82875	-3.20248	-3.57499	-3.54526	-3.16745	-1.37984	-3.20055	-2.26044	-4.2572	-3.97961	-3.67336	-2.60742	-4.65498	-3.22795	-3.47162	-3.60636	-3.91625	-3.90315	-3.84492	-3.7852	-3.66053	-3.92938	-3.36612	-3.62418	-2.89402	-3.96246	-4.51288	-3.49615	-4.54925	-3.162	0.936303
hsa-mir-24-1	3.39492	4.57009	4.37895	3.20955	3.27338	3.69924	3.80221	3.99439	5.43156	5.30386	5.24704	5.04541	4.91781	4.99551	4.28109	4.64901	4.55524	4.83511	4.9259	4.44561	3.8037	-0.66863	4.01663	2.38468	0.16299	4.0893	3.81676	4.07026	4.40428	5.08405	3.78724	4.14459	4.84891	4.10925	5.31506	4.87595	3.48096	4.06041	4.0732	4.93226	5.17915	4.78284	4.82692	2.64339	4.0955	4.87267	3.61942	4.26474	0.787038
hsa-mir-24-2	3.39492	4.57009	4.37895	3.20955	3.27338	3.69924	3.80221	3.99439	5.43156	5.30386	5.24704	5.04541	4.91781	4.99551	4.28109	4.64901	4.55524	4.83511	4.9259	4.44561	3.8037	-0.66863	4.01663	2.38468	0.16299	4.0893	3.81676	4.07026	4.40428	5.08405	3.78724	4.14459	4.84891	4.10925	5.31506	4.87595	3.48096	4.06041	4.0732	4.93226	5.17915	4.78284	4.82692	2.64339	4.0955	4.87267	3.61942	4.26474	0.787038
hsa-mir-24-1	-4.00187	-1.99911	-2.10332	-3.61457	-3.39764	-3.45342	-4.09009	-2.62015	-2.57471	-3.0705	-3.08043	-3.22387	-2.6672	-3.59245	-3.63916	-3.05498	-2.03241	-1.62163	-2.21192	-2.31865	-2.49718	-3.54526	-3.16745	-1.37984	-3.20055	-2.26044	-4.2572	-3.97961	-3.67336	-2.60742	-4.02084	-3.22795	-3.25259	-3.60636	-3.91625	-3.90315	-2.88387	-3.7852	-3.66053	-3.92938	-3.34157	-2.94991	-2.50252	-3.96246	-4.41313	-3.49615	-4.54925	-2.8381	0.618957
hsa-mir-25	4.78875	3.16245	3.349	3.26973	3.32925	2.99759	3.42359	3.39839	2.0119	3.44775	4.03582	3.72337	2.5036	2.41246	3.25802	3.28675	2.13574	1.91502	3.66492	2.89623	4.03691	3.56127	4.34763	4.75857	5.68761	4.28327	1.50221	3.43819	3.35996	3.34153	2.10436	3.87761	2.97737	3.64926	3.72394	3.45934	2.85564	2.7567	2.18479	1.50844	3.66592	2.91926	3.26453	2.5111	1.43775	3.00853	2.23149	3.65226	0.408805
hsa-mir-25	-3.32655	-3.41228	-3.64656	-3.61457	-3.39764	-3.45342	-4.11624	-3.68703	-4.28534	-3.0705	-3.45364	-3.52926	-4.41023	-3.80239	-3.63916	-3.09348	-3.86184	-4.30556	-3.69773	-3.20248	-4.26859	-3.54526	-3.16745	-1.37984	-2.68799	-2.26044	-4.2572	-3.31642	-3.67336	-2.60742	-4.65498	-3.09833	-3.4968	-3.60636	-3.91625	-3.90315	-4.02758	-3.7852	-3.66053	-3.92938	-3.36612	-3.62418	-2.89402	-3.96246	-4.51288	-3.49615	-4.54925	-3.162	0.960072
hsa-mir-26a-1	2.89356	3.79674	1.75574	1.63821	1.64462	3.02123	2.17402	1.48479	2.7069	2.28391	1.80823	2.80539	1.72452	1.7089	2.50849	2.21235	1.9197	2.06962	2.13773	1.29985	2.50886	2.0923	3.02394	1.13043	1.83758	-0.36045	2.4928	2.78389	1.98248	0.79608	1.74696	0.61943	2.54177	2.33873	2.33448	1.87023	2.57187	1.47026	2.54845	1.85563	2.02955	-0.11616	0.57877	2.30156	1.86594	0.59959	3.26773	1.28721	0.118197
hsa-mir-26a-2	2.89356	3.79674	1.75574	1.63821	1.64462	3.02123	2.17402	1.48479	2.7069	2.28391	1.80823	2.80539	1.72452	1.7089	2.50849	2.21235	1.9197	2.06962	2.13773	1.29985	2.50886	2.0923	3.02394	1.13043	1.83758	-0.36045	2.4928	2.78389	1.98248	0.79608	1.74696	0.61943	2.54177	2.33873	2.33448	1.87023	2.57187	1.47026	2.54845	1.85563	2.02955	-0.11616	0.57877	2.30156	1.86594	0.59959	3.26773	1.28721	0.118197
hsa-mir-26b	3.01605	2.96569	2.59707	2.49641	1.60576	2.79078	2.37801	2.25675	3.00907	0.81925	1.75847	1.91209	1.52531	0.24385	1.62819	1.12547	1.59186	1.28213	1.9473	1.20125	2.40428	2.93685	3.77293	1.41881	2.07825	1.67289	1.88254	2.08739	1.23567	1.52767	1.18793	1.40904	2.44053	1.40184	3.71756	2.85726	2.34962	1.78214	1.5532	1.02554	2.55147	0.33232	0.48156	1.4742	0.86597	0.36809	2.48104	1.32776	0.0262644
hsa-mir-27a	3.41543	3.06416	2.98138	3.34468	3.35382	3.64051	3.17354	3.46939	4.95488	4.41171	5.02405	5.02581	4.93801	4.42364	4.46671	5.27033	4.13123	4.14429	5.08022	4.29373	2.81974	-1.5806	4.46795	2.9519	-0.95426	4.46811	4.0457	4.6579	4.5269	4.88538	3.33491	4.32043	4.88577	4.85657	4.66827	4.69562	1.90615	3.55183	4.33764	4.80194	5.10649	4.41176	4.88542	3.42705	3.90842	4.77858	4.09263	4.37041	0.518853
hsa-mir-27b	2.27252	4.41816	4.69486	1.13665	0.83776	2.2288	1.85151	4.02766	3.83728	3.56454	2.7317	3.48415	3.80994	2.93694	2.41629	3.48592	4.0945	4.52334	4.38945	4.05993	4.05301	-0.68762	1.26698	0.69336	0.82304	1.42936	0.52993	1.64772	1.76527	2.22729	2.44228	1.20075	3.54047	2.697	1.55008	1.07019	3.60937	1.89541	0.77989	0.32933	2.64702	2.84266	3.39746	2.37145	2.61826	1.86162	2.12582	3.25431	0.250447
hsa-mir-28	-4.00187	-3.41228	-3.64656	-3.61457	-3.39764	-3.45342	-4.11624	-3.68703	-4.28534	-3.0705	-3.45364	-3.52926	-4.41023	-3.80239	-3.63916	-3.09348	-3.86184	-4.30556	-3.69773	-3.20248	-4.38761	-3.54526	-3.16745	-1.37984	-3.20055	-2.26044	-3.97338	-3.89002	-3.67336	-2.60742	-4.40685	-3.22795	-3.4968	-3.60636	-3.91625	-3.90315	-4.02758	-3.7852	-3.66053	-3.92938	-3.36612	-3.62418	-2.89402	-3.96246	-4.51288	-3.49615	-4.32889	-3.162	0.778985
hsa-mir-28	-2.08825	-0.91981	-0.6579	-1.02024	-1.52438	-2.16549	-1.32533	-1.16599	-0.1846	-0.80681	-0.26256	-0.36728	0.30254	-1.57143	-0.92405	-1.02115	-0.25849	0.29829	-0.13765	-1.27593	-2.24747	-2.14082	-2.05943	-1.37984	0.0055	-1.23046	-1.4831	-0.40649	-0.11703	0.98243	-1.86231	0.44972	-0.14818	0.33496	-0.11481	-0.89114	-1.2673	0.2112	-1.95117	-1.30324	-0.89805	0.39211	0.40077	-1.25491	-1.68438	0.03831	-0.75045	-0.65882	0.165053
hsa-mir-296	-3.00387	-2.89042	-3.51012	-3.61457	-3.27553	-3.45342	-4.11624	-3.68703	-4.28534	-3.0705	-3.09312	-3.52926	-4.18692	-3.51736	-2.73026	-3.09348	-3.86184	-4.30556	-3.69773	-3.03468	-4.38761	-3.4266	-3.16745	-1.37984	-3.20055	-2.26044	-3.86917	-3.7936	-3.67336	-2.60742	-3.17752	-3.19475	-3.4968	-3.60636	-2.42898	-3.65614	-4.02758	-3.7852	-3.46757	-3.92938	-3.36612	-3.62418	-2.89402	-3.73606	-2.55514	-3.49615	-3.12472	-3.05939	0.637853
hsa-mir-299	-4.00187	-3.41228	-3.64656	-3.61457	-3.39764	-3.45342	-4.11624	-3.68703	-4.28534	-3.0705	-3.45364	-3.52926	-1.60708	-3.14643	-2.13793	-3.00763	-3.86184	-1.54362	-3.69773	-3.20248	-4.38761	-3.54526	-3.16745	-1.37984	-3.20055	-2.26044	-4.2572	-3.97961	-3.67336	-2.60742	-4.65498	-3.22795	-3.4968	-3.60636	-2.29644	-3.90315	-4.02758	-3.72419	-3.66053	-3.92938	-3.27749	-3.62418	-2.89014	-3.1668	-4.51288	-3.49615	-4.54925	-3.162	0.222918
hsa-mir-299	-4.00187	-3.41228	-3.64656	-3.61457	-3.39764	-3.45342	-4.11624	-3.68703	-4.28534	-3.0705	-3.45364	-3.52926	-0.08438	-1.86804	-0.66853	-1.75896	-3.19635	-0.08662	-3.52286	-2.06016	-4.38761	-3.54526	-3.16745	-1.13917	-3.20055	-2.26044	-4.2572	-3.97961	-3.67336	-2.60742	-4.31884	-3.22795	-3.4968	-3.60636	-1.46364	-3.27428	-4.02758	-3.7852	-3.66053	-3.92938	-3.36612	-3.62418	-2.89402	-2.4691	-4.32996	-3.49615	-4.54925	-3.162	0.0862924
hsa-mir-29a	2.3256	1.3361	4.82687	5.6202	5.18398	5.30159	5.07663	5.43685	3.27379	2.37648	4.71032	6.99017	4.81158	4.7063	5.52598	5.55172	4.20158	4.12081	4.92635	4.39353	5.09658	1.76716	3.22463	2.10168	3.59752	5.4903	5.83372	4.80512	6.38762	6.96455	3.83092	6.37175	5.83466	7.51156	5.54707	2.82026	2.32444	5.7828	6.25259	6.59169	5.7469	4.3005	5.50287	5.75788	4.41377	5.04342	5.11088	6.34355	0.0748483
hsa-mir-29a	-4.00187	-3.41228	-3.64656	-3.61457	-3.39764	-3.45342	-4.11624	-3.68703	-4.28534	-3.0705	-3.45364	-3.52026	-4.41023	-3.80239	-3.63916	-3.09348	-3.86184	-4.30556	-3.69773	-3.20248	-4.09011	-3.54526	-3.16745	-1.37984	-3.20055	-2.26044	-2.66121	-3.57932	-3.67336	-2.60742	-4.65498	-3.22795	-3.4968	-3.60636	-3.91625	-3.90315	-4.02758	-3.7852	-2.48007	-3.92938	-3.36612	-3.62418	-2.89402	-2.25669	-4.051	-3.49615	-2.96291	-3.162	0.280636
hsa-mir-29b-2	2.29192	3.47077	4.5231	5.077	5.15127	5.20506	4.63574	4.7894	3.03694	-0.95205	3.66177	6.46125	3.27647	3.81516	4.83144	4.5814	1.79966	2.10365	3.89742	3.73872	4.9704	1.84867	3.05427	1.34989	2.56457	4.04184	5.82968	4.524	5.42018	6.12482	3.60172	5.44202	5.02328	6.56126	4.86414	2.45544	2.19961	5.18883	5.97714	5.73242	4.53158	3.25662	4.37534	5.70445	4.07	3.64381	5.22813	5.40499	0.303152
hsa-mir-29b-1	2.29192	3.47077	4.5231	5.077	5.15127	5.20506	4.63574	4.7894	3.03694	-0.95205	3.66177	6.46125	3.27647	3.81516	4.83144	4.5814	1.79966	2.10365	3.89742	3.73872	4.9704	1.84867	3.05427	1.34989	2.56457	4.04184	5.82968	4.524	5.42018	6.12482	3.60172	5.44202	5.02328	6.56126	4.86414	2.45544	2.19961	5.18883	5.97714	5.73242	4.53158	3.25662	4.37534	5.70445	4.07	3.64381	5.22813	5.40499	0.303152
hsa-mir-29b-1	-4.00187	-3.41228	-2.03068	-1.38399	-1.17124	-1.29359	-2.91817	-1.29543	-4.28534	-3.0705	-2.58374	0	-2.21176	-2.7783	-1.34816	-1.51136	-2.7644	-3.04096	-2.36781	-2.54387	-1.38303	-3.54526	-3.16745	-1.37984	-3.0814	-1.05366	-0.35481	-1.01768	-1.19654	-0.14341	-3.07506	-0.05688	-0.99907	0.77038	-1.72338	-3.90315	-4.02758	-1.39575	-0.44186	-0.23381	-1.32807	-2.66288	-2.01053	0.12302	-1.71913	-1.88767	-1.24708	-1.11602	0.0490611
hsa-mir-29c	1.65039	4.11454	3.34833	2.77695	2.49976	2.76015	2.35669	2.41549	1.44928	0.03765	0.83281	4.04558	1.63939	1.60111	2.81644	2.65191	1.39357	1.69801	2.79691	2.27658	3.00907	3.72114	3.51749	1.08972	5.39807	4.58935	3.62587	2.73507	1.91808	2.09706	1.83166	1.77116	2.75343	4.04517	2.05497	1.2688	1.05171	2.44373	3.94723	2.01389	3.0313	1.48312	2.84994	4.23085	3.17615	2.11159	3.7737	2.73822	0.204933
hsa-mir-29c	-3.88222	-1.31459	-2.81524	-3.46314	-3.39764	-3.45342	-3.49188	-3.43838	-4.28534	-3.0705	-3.2396	-3.17976	-4.41023	-3.80239	-3.63916	-3.09348	-3.86184	-4.00666	-3.30075	-3.20248	-4.38761	-1.0029	-1.824	-1.27815	-0.82484	-1.60582	-4.2572	-3.97961	-3.47345	-2.60742	-4.50691	-3.22795	-3.4968	-3.42175	-3.91625	-3.32063	-4.02758	-3.44548	-3.66053	-3.55173	-2.86809	-3.62418	-2.89402	-3.96246	-3.81406	-3.49615	-4.14034	-3.10483	0.88621
hsa-mir-301	2.89815	3.50624	-0.4154	-0.61005	0.66627	0.64743	0.73148	0.26629	1.27096	-0.60484	-0.29849	1.07582	-0.51313	-1.096	0.60285	-1.15512	0.38741	-0.67638	0.34054	-0.46632	-0.34493	1.07458	0.53846	-0.79033	1.96537	0.29091	0.17345	-1.05511	0.84361	-0.08354	0.55177	-1.15209	0.82348	-0.4663	1.34142	2.909	0.93057	0.49194	0.56359	2.12933	0.61763	0.55417	-1.00617	-1.27907	0.36176	-0.79244	-0.9366	0.38233	0.156049
hsa-miR-301b	-1.77301	-1.14397	-3.30221	-3.42369	-1.90902	-2.32974	-2.4832	-1.92662	-1.4013	-3.0705	-2.30277	-2.51062	-2.42691	-3.72128	-2.19613	-3.09348	-3.86184	-4.18427	-3.24227	-3.20248	-3.07887	-1.08397	-2.93165	-0.70144	-0.23941	-2.09958	-4.2572	-3.78283	-3.53828	-2.55427	-2.36345	-3.22795	-1.95413	-3.5521	-2.71644	-1.17319	-2.18848	-2.56881	-3.62288	-2.43743	-2.41917	-2.91392	-2.89402	-3.96246	-4.51288	-3.36166	-4.02441	-3.162	0.0786838
hsa-mir-30a	1.48838	2.98833	-3.64656	-3.61457	-3.39764	-2.95287	-1.65286	-3.49567	3.23745	3.02302	4.28475	4.49731	0.83123	2.70358	2.29508	1.08677	1.56827	1.87712	3.66526	2.57067	-4.38761	-3.46415	-2.75549	-1.37984	-3.20055	-2.26044	0.76023	-0.17686	1.29891	0.68958	1.37589	2.07331	4.14383	3.3195	2.56584	4.50137	4.89848	2.72711	3.41184	4.06515	-1.32768	3.08591	3.47882	4.78388	4.31475	2.31566	3.0965	4.83526	0.0325368
hsa-mir-30a	-1.99571	-0.67878	-3.64656	-3.61457	-3.39764	-3.45342	-4.11624	-3.68703	-0.32761	0.30601	1.23308	1.09945	-2.37426	-0.95481	-0.93614	-1.95745	-1.74044	-1.27523	0.48858	-0.52563	-4.38761	-3.54526	-3.16745	-1.37984	-3.20055	-2.26044	-2.46946	-3.70184	-2.05023	-2.38509	-2.19371	-0.47629	1.06468	0.23579	-0.97107	1.52486	1.68094	-0.38588	-0.02053	0.70834	-3.36612	0.3254	0.22722	1.44396	0.80781	-0.52087	-0.28358	1.97218	0.0562142
hsa-mir-30b	2.67914	2.78268	2.64563	2.09221	1.58647	1.78708	3.35298	3.37428	2.55082	0.84137	2.85156	2.52532	1.69608	2.16585	1.13596	2.10504	1.52697	1.5678	2.41934	2.17977	1.7755	2.21424	3.04658	2.06152	3.03256	1.87146	1.51288	2.72858	2.9716	2.51402	2.49388	3.4025	1.90415	2.38085	3.55826	0.91558	2.0342	2.13585	2.28968	2.76102	2.84263	1.71402	1.75937	1.29274	2.20436	2.57851	1.46278	1.78929	0.297677
hsa-mir-30b	-4.00187	-3.41228	-3.64656	-3.61457	-3.39764	-3.45342	-3.65325	-2.73565	-4.28534	-3.0705	-3.42322	-3.52926	-4.41023	-3.80239	-3.63916	-3.09348	-3.86184	-4.30556	-3.69773	-3.20248	-4.38761	-3.45808	-3.16745	-1.37984	-3.02401	-2.26044	-4.2572	-3.41969	-3.66022	-2.60742	-4.19317	-2.08863	-3.4968	-3.56831	-3.1006	-3.90315	-4.02758	-3.7852	-3.66053	-3.92938	-3.33182	-3.62418	-2.89402	-3.96246	-4.45999	-3.34034	-4.54925	-3.162	0.991324
hsa-mir-30c-1	1.03488	1.85167	0.91834	0.02726	0.71214	0.9776	-0.03897	-0.21801	1.65599	1.97899	2.38798	2.61643	-0.07718	1.66501	1.61535	0.68819	0.35348	0.72236	2.24029	1.91678	0.58878	2.10975	2.74303	0.31054	1.30319	-0.19144	0.73806	1.27174	0.19328	0.11893	1.23041	0.21297	1.86931	1.00124	1.25934	2.5079	3.71174	0.83052	2.16963	1.68086	0.45531	1.00361	1.03826	3.68051	3.09995	0.4898	2.17314	2.78558	0.274583
hsa-mir-30c-2	1.03488	1.85167	0.91834	0.02726	0.71214	0.9776	-0.03897	-0.21801	1.65599	1.97899	2.38798	2.61643	-0.07718	1.66501	1.61535	0.68819	0.35348	0.72236	2.24029	1.91678	0.58878	2.10975	2.74303	0.31054	1.30319	-0.19144	0.73806	1.27174	0.19328	0.11893	1.23041	0.21297	1.86931	1.00124	1.25934	2.5079	3.71174	0.83052	2.16963	1.68086	0.45531	1.00361	1.03826	3.68051	3.09995	0.4898	2.17314	2.78558	0.274583
hsa-mir-30c-1	-4.00187	-3.41228	-3.64656	-3.61457	-3.39764	-3.45342	-4.11624	-3.68703	-4.28534	-3.0705	-3.45364	-3.52926	-4.41023	-3.80239	-3.63916	-3.09348	-3.86184	-4.30556	-3.69773	-3.20248	-4.38761	-3.53207	-3.16745	-1.37984	-3.20055	-2.26044	-4.2572	-3.97961	-3.67336	-2.60742	-4.65498	-3.22795	-3.4968	-3.60636	-3.91625	-3.90315	-4.02758	-3.7852	-3.66053	-3.92938	-3.36612	-3.62418	-2.89402	-3.96246	-4.51288	-3.49615	-4.54925	-3.162	0.870728
hsa-mir-30c-2	-4.00187	-3.31603	-3.64656	-3.61457	-3.39764	-3.45342	-4.11624	-3.68703	-2.93493	-2.59171	-1.38417	-1.61771	-4.41023	-2.91274	-3.50406	-3.09348	-3.86184	-4.04566	-2.06571	-2.75405	-4.38761	-3.22589	-3.16745	-1.37984	-3.20055	-2.26044	-4.2572	-3.97961	-3.67336	-2.60742	-4.11361	-2.92052	-1.47103	-2.27739	-2.97348	-1.26235	-0.93628	-3.07948	-2.32092	-2.55919	-3.36612	-2.36775	-2.11055	-0.72271	-1.49474	-2.74504	-2.67119	-0.47753	0.0983577
hsa-mir-30d	1.54103	1.8061	1.29901	0.70469	0.57577	0.53602	2.35974	2.11212	1.6787	0.35808	2.02798	1.45169	0.55009	1.56251	0.50033	0.96396	0.44396	0.28712	1.2403	1.03334	0.5378	1.28598	2.02447	1.22948	1.79737	0.71197	0.58104	1.54114	2.18479	1.58674	1.49367	2.22891	0.9472	1.1898	2.52635	0.20224	1.14589	1.45656	1.30003	2.1441	1.94716	0.82735	1.41048	0.90766	1.34649	1.7378	0.70842	1.09696	0.581438
hsa-mir-30d	-4.00187	-3.41228	-3.64656	-3.61457	-3.39764	-3.45342	-3.99727	-3.18836	-4.28534	-3.0705	-3.45364	-3.52926	-4.41023	-3.80239	-3.63916	-3.09348	-3.86184	-4.30556	-3.69773	-3.20248	-4.38761	-3.54526	-3.16745	-1.37984	-3.13553	-2.26044	-4.2572	-3.68003	-3.67336	-2.60742	-4.29756	-3.06325	-3.4968	-3.60636	-3.4503	-3.90315	-4.02758	-3.7852	-3.66053	-3.92938	-3.36612	-3.62418	-2.89402	-3.96246	-4.38835	-3.49615	-4.54925	-3.162	0.932324
hsa-mir-30e	1.17897	1.55324	1.51535	0.88189	0.973	0.97144	0.75011	0.61825	1.21744	0.32113	1.512	1.08207	0.02149	0.356	0.70172	0.51018	0.42114	0.46887	1.55073	0.91946	0.91059	2.03891	2.94841	1.41717	2.27524	0.76303	0.477	1.34085	0.66471	0.85657	0.54319	0.55376	0.55831	0.73996	1.16689	1.71245	0.98907	0.09686	0.7083	0.45075	1.19037	-0.10256	0.68789	1.52627	0.79424	-0.07179	1.2569	1.34924	0.534254
hsa-mir-30e	-1.87996	-1.45053	-2.32279	-2.61587	-2.08106	-2.24172	-3.35332	-2.65235	-1.55982	-1.1397	-0.83022	-0.52323	-2.55721	-2.06345	-1.59771	-1.95566	-2.01194	-1.90343	-0.43697	-1.17179	-2.32711	-0.69011	-0.53583	-1.27891	0.00916	-1.64425	-2.27099	-1.44981	-2.42726	-1.84982	-2.2359	-1.45535	-0.79193	-1.18935	-2.00387	-0.11407	0.30507	-2.36157	-1.15076	-1.90098	-2.19448	-1.93665	-1.92678	0.51881	-0.22809	-2.45681	-0.78259	-0.29306	0.0321505
hsa-mir-31	-4.00187	-3.41228	1.50676	-3.61457	3.97013	0.80446	4.14727	3.3961	-4.28534	4.48674	0.02873	-3.52926	1.16705	1.68309	-3.63916	2.94332	1.81131	-0.02587	0.4488	1.31232	-1.19097	-3.54526	-3.16745	-1.37984	-3.20055	-2.26044	3.2242	-1.07198	-3.07533	-1.03345	-4.24025	-3.22795	3.95128	2.50976	1.1111	3.20756	-2.70802	1.88975	0.84673	1.00499	2.88003	0.77446	1.57883	-3.96246	2.69378	0.48738	-1.24526	1.56617	0.656318
hsa-mir-31	-4.00187	-3.41228	0.36667	-3.61457	3.37247	2e-05	2.64545	2.60855	-4.28534	3.38662	-0.41689	-3.52926	0.39737	0.29633	-3.63916	1.98426	0.76638	-0.99235	-0.23691	0.9622	-1.93883	-3.54526	-3.16745	-1.37984	-3.20055	-2.26044	1.95655	-2.45143	-3.44188	-1.17997	-4.65498	-3.22795	3.20093	1.61367	0.01635	2.95708	-3.94492	1.37626	-0.40813	0.63027	2.2675	0.77876	0.88536	-3.96246	1.25344	0.07272	-2.76687	1.46489	0.617002
hsa-mir-32	-2.10073	-1.00254	-1.24769	-2.05534	-2.19017	-1.78801	-2.58158	-2.49975	-1.957	-3.0705	-3.45364	-0.80176	-4.28852	-3.71616	-2.02666	-3.09348	-2.95369	-2.92822	-2.51709	-3.0004	-1.87004	-0.58091	-0.44963	-1.37984	-1.35311	-2.26044	-2.06274	-2.47314	-3.62688	-2.60742	-3.25466	-3.22795	-2.79302	-2.62907	-1.9913	-2.6386	-1.57202	-3.14249	-1.57021	-3.92938	-1.92775	-3.28215	-2.89402	-2.69158	-3.28115	-3.49615	-0.83358	-2.38721	0.343266
NA	2.16906	2.20616	1.76953	1.94084	2.62382	2.73867	1.80271	3.32707	0.16401	2.96109	1.49572	2.02377	2.2861	2.99661	2.08838	2.29043	2.82298	1.2252	1.7965	1.96873	2.16681	1.20949	1.39971	2.27769	2.26939	1.30266	1.51186	1.6726	1.93898	1.59569	1.71797	1.97389	1.46843	0.73233	1.98506	0.91235	2.10014	1.10257	1.8026	1.40501	2.13406	1.00816	1.59153	0.88722	1.04755	2.05793	1.98869	1.67995	0.0872463
hsa-mir-324	2.25475	2.49496	2.61553	2.42419	3.35191	3.32128	1.35494	1.71789	1.25595	1.88488	1.9283	2.40904	1.85441	3.07001	3.20326	3.4268	2.03333	1.69639	2.57754	3.97715	3.44897	3.40024	4.1725	1.75028	2.23308	1.92367	3.43185	3.92999	1.09755	1.8925	3.25655	1.71164	1.38147	1.30429	1.22527	1.13532	3.7749	1.23876	3.63673	1.67412	1.8871	1.83986	1.98687	4.20625	3.47902	1.21501	3.69807	2.15853	0.431362
hsa-mir-324	1.54954	1.71814	0.52566	-0.25757	0.58422	0.96745	0.43544	0.38368	1.38474	0.11737	0.47208	0.93899	0.20046	1.07236	0.70525	-1.06136	0.34352	-0.51748	0.02053	0.05391	0.29264	0.52656	-0.91605	-0.59322	1.38081	0.52108	-0.17013	0.977	0.29629	0.97886	0.5178	1.31784	-0.04934	-1.01415	1.26125	1.319	0.26418	0.65447	-0.46396	1.05689	0.1457	0.75494	-0.1203	-1.23827	-1.39829	-0.74495	-0.41078	-0.06216	0.0429047
hsa-mir-326	-3.88561	-2.77709	-3.64656	-3.61457	-3.39764	-3.45342	-3.59301	-3.68703	-4.28534	-3.0705	-3.23681	-3.52926	-4.41023	-3.80239	-3.63916	-3.09348	-3.86184	-4.30556	-3.69773	-3.20248	-4.38761	-3.54526	-3.16745	-1.37984	-3.20055	-2.26044	-4.2572	-3.97961	-3.67336	-2.60742	-4.65498	-3.22795	-3.4968	-3.60636	-3.41115	-2.68114	-3.64939	-3.61986	-3.66053	-3.92938	-3.36612	-3.62418	-2.89402	-3.96246	-4.51288	-3.49615	-4.54925	-3.162	0.847672
hsa-mir-328	-3.88189	-3.1132	-3.64656	-3.61457	-3.23447	-3.45342	-3.93458	-3.68703	-4.03849	-2.7457	-2.5136	-3.52926	-4.41023	-3.61743	-3.63916	-3.09348	-3.86184	-4.30556	-3.69773	-3.20248	-4.38761	-3.54526	-3.16745	-0.03682	-3.20055	-2.26044	-4.2572	-3.97961	-2.97806	-2.60742	-3.43385	-3.22795	-3.4968	-3.60636	-2.62813	-2.26219	-4.02758	-3.7852	-3.66053	-1.89418	-3.28599	-2.92427	-2.63251	-3.96246	-3.82681	-3.49615	-3.74787	-2.32338	0.587856
hsa-mir-329-1	-4.00187	-3.41228	-3.64656	-3.61457	-3.39764	-3.45342	-4.11624	-3.68703	-4.28534	-3.0705	-3.45364	-3.52926	-2.45817	-3.80239	-1.23163	-3.09348	-3.86184	-1.28853	-3.69773	-2.99357	-4.38761	-3.54526	-3.16745	-1.37984	-3.20055	-2.26044	-4.2572	-3.97961	-3.67336	-2.60742	-4.65498	-3.22795	-3.4968	-3.60636	-2.13734	-3.81245	-4.02758	-3.7852	-3.66053	-3.92938	-3.36612	-3.62418	-2.89402	-3.96246	-4.51288	-3.49615	-4.54925	-3.162	0.284804
hsa-mir-329-2	-4.00187	-3.41228	-3.64656	-3.61457	-3.39764	-3.45342	-4.11624	-3.68703	-4.28534	-3.0705	-3.45364	-3.52926	-2.45817	-3.80239	-1.23163	-3.09348	-3.86184	-1.28853	-3.69773	-2.99357	-4.38761	-3.54526	-3.16745	-1.37984	-3.20055	-2.26044	-4.2572	-3.97961	-3.67336	-2.60742	-4.65498	-3.22795	-3.4968	-3.60636	-2.13734	-3.81245	-4.02758	-3.7852	-3.66053	-3.92938	-3.36612	-3.62418	-2.89402	-3.96246	-4.51288	-3.49615	-4.54925	-3.162	0.284804
hsa-mir-330	-2.86436	-3.1352	-3.64656	-3.61457	-2.29329	-2.47379	-3.7395	-3.3622	-3.94074	-3.0705	-3.45364	-3.39615	-3.95015	-3.01747	-3.5002	-2.74809	-3.83456	-4.30556	-3.69773	-3.20248	-3.27842	-2.17011	-2.8489	-1.37984	-3.20055	-2.26044	-2.55826	-3.09578	-3.67336	-2.53539	-2.26238	-3.22795	-2.16661	-3.60636	-3.0296	-3.18657	-1.98113	-3.728	-3.18677	-3.92938	-3.29743	-3.5281	-2.89402	-3.21515	-3.34434	-2.92291	-3.21316	-3.162	0.497163
hsa-mir-331	1.99793	2.64942	0.59973	1.12629	1.61404	1.73656	1.33486	1.85014	1.96602	1.84078	0.81367	1.95205	0.01105	0.66956	1.34055	0.49851	0.78238	0.70311	1.26713	1.36914	0.54273	1.67632	1.65354	1.47872	2.37063	1.84926	0.69252	-0.01864	1.06215	1.43245	0.42884	0.25596	1.32865	1.29797	2.12315	1.89516	1.35071	1.69042	0.72255	1.72246	2.78141	1.87252	1.30967	1.57119	1.50655	1.7662	1.44908	2.62701	0.240521
hsa-mir-331	-4.00187	-3.41228	-3.64656	-3.61457	-3.39764	-3.45342	-4.11624	-3.68703	-4.28534	-3.0705	-3.45364	-3.52926	-4.41023	-3.80239	-3.63916	-3.09348	-3.86184	-4.30556	-3.69773	-3.20248	-4.38761	-3.54526	-3.16745	-1.37984	-3.20055	-2.26044	-4.2572	-3.97961	-3.67336	-2.60742	-4.65498	-3.22795	-3.4968	-3.60636	-3.91625	-3.90315	-4.02758	-3.7852	-3.66053	-3.92938	-3.36612	-3.62418	-2.89402	-3.96246	-4.51288	-3.49615	-4.53491	-3.162	0.8705
hsa-mir-335	-0.13335	-3.41228	-1.42571	-0.51811	-2.55502	-1.76645	-1.65826	-1.28379	-4.28534	-0.31403	-1.14752	-1.33938	-3.03162	-2.64151	1.39418	-3.09348	-3.86184	-4.30556	-0.12225	-0.12057	0.03649	-3.54526	-3.0529	-1.37984	-3.20055	-2.26044	-4.2572	-3.97961	-3.67336	-2.60742	-4.65498	-3.22795	-0.66656	-0.56496	-1.97991	-3.90315	-1.56521	-2.92866	-0.72436	-1.44057	-1.65794	-3.62418	-2.89402	-3.96246	-4.51288	-3.49615	1.58419	-2.93587	0.196946
hsa-mir-335	-2.96061	-3.41228	-3.3619	-3.25173	-3.32706	-2.92978	-4.11624	-3.68703	-4.28534	-2.90504	-3.31319	-3.48286	-4.41023	-3.80239	-0.54085	-3.09348	-3.86184	-4.30556	-3.6319	-2.27964	-1.21688	-3.54526	-3.16745	-1.33617	-3.20055	-2.26044	-4.2572	-3.97961	-3.67336	-2.60742	-4.51286	-3.22795	-3.4968	-3.60636	-3.91625	-3.4132	-2.3106	-3.687	-1.73281	-3.92938	-3.36612	-3.62418	-2.89402	-3.96246	-4.35673	-3.49615	0.44976	-3.162	0.464235
hsa-mir-337	-4.00187	-3.41228	-3.64656	-3.61457	-3.39764	-3.45342	-4.11624	-3.68703	-4.28534	-3.0705	-3.45014	-3.52926	-1.8262	-3.48232	-1.69379	-3.09348	-3.86184	-1.69002	-3.69773	-3.18463	-4.38761	-3.54526	-3.16745	-0.71265	-3.20055	-2.26044	-4.2572	-3.97961	-3.44757	-2.60742	-4.18615	-3.22795	-3.4968	-3.60636	-2.50619	-3.03915	-4.02758	-3.7852	-3.66053	-3.78314	-3.36612	-3.62418	-2.89402	-3.52968	-4.37375	-3.49615	-4.51728	-3.0456	0.173198
hsa-mir-337	-4.00187	-3.41228	-3.64656	-3.61457	-3.39764	-3.45342	-4.11624	-3.68703	-4.28534	-3.0705	-3.45364	-3.52926	-0.82697	-3.17468	-0.89671	-3.00305	-2.97715	-0.14666	-3.69773	-2.38612	-4.38761	-3.54526	-3.16745	-1.37984	-3.20055	-2.26044	-4.2572	-3.97961	-3.67336	-2.60742	-4.65498	-3.22795	-3.49423	-3.60636	-1.26463	-3.90315	-4.02758	-3.7852	-3.66053	-3.92938	-3.36612	-3.62418	-2.89402	-3.48941	-4.51288	-3.49615	-4.54925	-3.162	0.166857
hsa-mir-338	-0.62815	-2.54146	-3.64656	1.73769	-3.39764	-3.31459	0.91947	-3.68703	-4.28534	-3.0705	-3.45364	-3.52926	-4.41023	-3.80239	-3.63916	-3.09348	-3.86184	0.5912	-3.69773	-3.20248	-4.38761	-3.54526	-3.16745	-1.37984	-3.20055	-2.26044	-4.2572	-3.97961	0.08658	-2.60742	-1.56272	-3.22795	-3.4968	-3.60636	-3.90541	-1.0911	-3.81911	-3.7852	-3.55945	-2.86898	-3.36612	-3.62418	-2.89402	-3.96246	-4.51288	-3.49615	-4.54925	-3.162	0.07469
hsa-mir-338	-4.00187	-3.41228	-3.64656	-3.61457	-3.30656	-3.45342	-4.11624	-3.68703	-4.28534	-3.0705	-3.45364	-3.52926	-4.41023	-3.08058	-3.14713	-3.09348	-3.86184	-4.30556	-3.69773	-3.18653	-2.97128	-2.11056	-1.6373	-1.37984	-3.20055	-2.26044	-2.46349	-2.39793	-3.67336	-2.60742	-2.82646	-3.22795	-3.4968	-3.60636	-3.91625	-3.90315	-2.62873	-3.7852	-2.43508	-3.92938	-3.36612	-3.62418	-2.89402	-2.01625	-2.45645	-3.49615	-2.26894	-3.162	0.0184834
hsa-mir-339	-2.50064	-2.67583	-3.4975	-3.42284	-3.39764	-3.45342	-3.49096	-3.42554	-3.68799	-3.0705	-3.45364	-3.52926	-4.29794	-3.08003	-3.36116	-3.09348	-2.98844	-3.8292	-3.21458	-1.82507	-3.79366	-3.23214	-2.27112	-1.37984	-3.20055	-2.26044	-4.10066	-3.72239	-3.67336	-2.60742	-4.1798	-3.22795	-3.4968	-3.38978	-2.95949	-3.90315	-3.46956	-3.6065	-3.30402	-3.92938	-3.29461	-3.48899	-2.89402	-3.86979	-4.51288	-3.49615	-3.40636	-3.06171	0.83417
hsa-mir-339	-3.40311	-3.41228	-3.64656	-3.61457	-3.39764	-3.45342	-4.11624	-3.68703	-4.28534	-3.0705	-3.45364	-3.52926	-4.41023	-3.80239	-3.19136	-3.09348	-3.73957	-4.30556	-3.44181	-2.47355	-4.2844	-3.54526	-2.7674	-1.37984	-3.20055	-2.26044	-4.2572	-3.97961	-3.67336	-2.60742	-4.65498	-3.22795	-3.4968	-3.60636	-3.91625	-3.90315	-4.02758	-3.7852	-3.66053	-3.92938	-3.36612	-3.62418	-2.89402	-3.96246	-4.51288	-3.49615	-4.1169	-3.162	0.827434
hsa-mir-33	-2.01922	-1.53238	-0.79485	-2.31456	-1.95187	-1.40386	-2.45639	-1.3442	-2.24554	-3.0705	-0.67812	-2.29752	-2.18766	-3.59078	-3.24005	-3.09348	-2.21608	-3.32428	-2.18515	-3.19063	-2.31376	-0.9998	-0.89684	-1.37984	0.14152	-2.14736	-2.61439	-1.73686	0.54535	-2.3471	-2.95949	-1.32218	-1.68622	-3.28381	-3.19051	-2.39963	-1.02519	-1.92825	-2.1349	-2.29748	-2.4821	-2.30822	-2.89402	-3.19963	-4.48314	-3.36895	-1.36973	-2.79769	0.158865
hsa-mir-33b	-4.00187	-3.41228	-3.64656	-3.61457	-3.2864	-3.45342	-4.11624	-3.68703	-4.28534	-3.0705	-3.45364	-3.52926	-4.41023	-3.21133	-3.57424	-3.09348	-3.86184	-4.30556	-3.69773	-3.07793	-4.09717	-2.19238	-3.16745	-1.37984	-3.20055	-2.26044	-3.97819	-3.70969	-3.12782	-2.60742	-3.6177	-3.22795	-3.4968	-3.60636	-3.91625	-3.90315	-3.65253	-3.7852	-3.32001	-3.92938	-3.36612	-3.48622	-2.89402	-3.52203	-3.984	-3.49615	-2.9171	-3.162	0.218099
hsa-mir-340	-0.33678	-0.17787	-2.4685	-2.75879	-2.25792	-2.57255	-2.64432	-1.74572	-0.92624	-2.805	-0.49604	-1.50414	-2.57372	-2.78308	-1.15335	-3.09348	-2.76836	-2.30019	-0.76003	-2.44165	-1.66828	-3.54526	0.61634	-1.37984	-2.10305	-0.92382	-2.35073	-0.25617	-0.71369	-0.8462	-1.28403	-0.46352	-1.91181	-3.525	-0.5086	0.42537	-1.35407	-3.00459	-0.96198	-1.35596	-2.52591	-2.47979	-2.89402	-3.90478	-3.00189	-2.13606	-2.35798	-2.39673	0.794756
hsa-mir-340	-2.60384	-2.35691	-3.64656	-3.61457	-3.34612	-3.45342	-4.11624	-3.68703	-3.27297	-2.62692	-1.76099	-3.4231	-4.4041	-3.80239	-3.37077	-3.09348	-3.86184	-4.28746	-3.03965	-3.20248	-3.87299	-3.54526	-1.52673	-1.33392	-2.86226	-2.26044	-4.2572	-2.09097	-2.44686	-2.29926	-3.13437	-1.63723	-3.47376	-3.60636	-2.66987	-1.54079	-3.29478	-3.7852	-2.91506	-2.51041	-3.36612	-3.56146	-2.89402	-3.96246	-4.25862	-3.49615	-4.29217	-3.162	0.957766
hsa-mir-342	2.72422	2.15898	-3.64656	-3.61457	-0.88713	-3.45342	-4.11624	-3.68703	0.70134	1.33924	0.08231	-0.78744	0.01754	0.56898	1.71989	-0.51056	0.38603	0.43838	-0.32922	-0.34912	-4.38761	3.91775	2.02535	1.03164	4.52962	0.39719	-0.52365	-3.10629	-1.15167	-1.32529	-0.38101	-0.37931	0.10013	-3.60636	0.14014	2.40674	0.62361	-3.60354	0.02092	0.99548	1.76713	0.78408	-0.44104	-0.88722	-1.00435	0.29764	-0.3306	0.7322	0.113145
hsa-mir-342	-1.51521	-2.43794	-3.64656	-3.61457	-3.39764	-3.45342	-4.11624	-3.68703	-3.79057	-3.0705	-3.45364	-3.52926	-4.41023	-3.80239	-3.59451	-3.09348	-3.86184	-4.30556	-3.69773	-3.20248	-4.38761	-0.99346	-3.05011	-1.37984	-0.1339	-2.26044	-4.2572	-3.97961	-3.67336	-2.60742	-4.65498	-3.22795	-3.4968	-3.60636	-3.91625	-2.39941	-4.02758	-3.7852	-3.66053	-3.92938	-2.85313	-3.62418	-2.89402	-3.96246	-4.51288	-3.49615	-4.54925	-3.162	0.71971
hsa-mir-345	-2.75764	-3.41228	-3.58069	-3.08965	-3.39764	-3.45342	-4.11624	-3.68703	-4.28534	-3.0705	-3.45364	-3.51441	-4.37204	-2.11364	-2.66565	-3.09348	-3.86184	-4.11627	-3.69773	-3.20248	-3.61068	-1.25673	-2.54524	-1.37984	-3.08598	-2.26044	-3.17102	-3.79509	-3.67336	-2.60742	-3.3065	-3.22795	-3.4968	-3.60636	-3.91625	-2.26248	-2.26427	-3.7852	-3.14534	-3.92938	-3.36612	-3.62418	-2.89402	-3.95467	-4.46664	-3.49615	-4.14297	-3.162	0.331353
hsa-mir-34a	1.95768	3.41871	2.11101	-3.61457	1.65626	0.25535	1.25021	0.04737	2.34244	0.60261	0.99105	-1.52096	-1.93477	-1.8377	-3.63916	-3.09348	-3.00821	0.4912	-2.72794	-1.90976	-2.44564	-3.54526	-3.16745	-1.37984	0.47812	2.715	1.58685	-3.12872	0.17105	3.73974	2.63454	-3.22795	0.40668	1.7404	3.44458	-3.83015	2.97434	0.29375	-3.06014	-2.5198	-1.73697	-0.3872	2.67152	3.00265	1.58325	2.73576	-4.32558	3.41845	0.0798729
hsa-mir-34a	-3.69514	-2.18718	-3.36638	-3.61457	-3.02096	-3.45342	-4.09702	-3.68703	-3.41169	-3.0705	-3.45364	-3.52926	-4.41023	-3.80239	-3.63916	-3.09348	-3.86184	-4.30556	-3.69773	-3.20248	-4.38761	-3.54526	-3.16745	-1.37984	-3.20055	-2.26044	-3.53429	-3.97961	-3.67336	-2.44639	-2.44034	-3.22795	-3.4968	-3.60636	-1.57453	-3.90315	-1.61359	-3.7852	-3.66053	-3.92938	-3.36612	-3.62418	-2.89402	-1.81535	-3.10397	-3.31783	-4.54925	-2.50149	0.743277
hsa-mir-34b	-4.00187	-3.41228	-3.64656	-3.61457	-3.39764	-3.45342	-4.11624	-3.68703	-4.28534	-3.0705	-3.45364	-3.09273	-4.18351	-3.80239	-3.63916	-3.09348	-3.86184	-4.30556	-3.69773	-3.20248	-4.38761	-3.54526	-3.16745	-1.33336	-3.20055	-2.26044	-4.2572	-3.97961	-3.55468	-2.60742	-4.60066	-3.22795	-3.4968	-2.47596	-3.91625	-3.62923	-4.02758	-3.7852	-2.44087	-2.87463	-3.36612	-3.62418	-2.89402	-1.91111	-4.51288	-3.49615	-3.60248	-3.162	0.300453
hsa-mir-34b	-2.24833	-0.64213	-2.06202	-3.61457	-2.27319	-3.43246	-3.02234	-3.68703	-1.63997	-3.0705	-3.45364	0.25583	-1.06684	-3.80239	-3.63916	-3.09348	-3.86184	-1.53104	-3.69773	-3.20248	-4.38761	-3.54526	-3.16745	-1.37984	-3.20055	-2.26044	-1.80526	-3.97961	-0.03441	-1.05403	-0.91315	-3.22795	-1.56536	0.85603	-0.35355	-3.90315	-0.54071	-3.7852	0.18214	0.18555	-3.36612	-3.62418	-0.36071	1.78757	-1.13604	-1.10692	-1.09213	-0.70167	0.173543
hsa-mir-34c	-4.00187	-3.41228	-3.64656	-3.61457	-3.39764	-3.45342	-4.11624	-3.68703	-4.28534	-3.0705	-3.45364	-0.69503	-2.24884	-3.80239	-3.63916	-3.09348	-3.86184	-2.75173	-3.69773	-3.20248	-4.38761	-3.54526	-3.16745	-1.37984	-3.20055	-2.26044	-4.2572	-3.97961	-1.08858	-2.60742	-4.65498	-3.22795	-2.89958	-0.10692	-3.65304	-3.90315	-4.02758	-3.7852	-0.75254	-0.87353	-3.36612	-3.62418	-1.76989	0.48307	-4.51288	-2.91118	-2.03691	-2.38216	0.0464031
hsa-mir-361	-3.2383	-3.30266	-1.36133	-0.36791	-2.80807	-2.80063	-1.77116	-2.06211	-2.0787	-1.91497	-2.77123	-2.35238	-3.11378	-2.11367	-2.89891	-2.36202	-0.7673	-1.46446	-2.04036	-0.56461	-1.98541	-1.71538	-1.21758	-1.37984	-1.71444	-2.26044	-1.62613	-1.36389	-0.5046	-0.87882	-2.28526	-1.13631	-2.08419	-2.16899	-1.20577	-2.64997	-1.96428	-2.7942	-3.07884	-2.50599	-1.09497	-3.29254	-1.27983	-3.17953	-2.78882	-1.9781	-1.89724	-2.93468	0.341739
hsa-mir-361	-0.15058	0.36602	0.57735	-0.05039	-0.45608	-0.16665	0.29403	0.05849	0.69441	1.03415	0.40276	0.68487	-0.7179	0.36365	-0.02065	0.31434	0.51154	0.50121	0.67307	1.51388	0.67767	1.16189	1.58349	-1.1461	1.6715	-0.07194	0.12113	0.65803	1.74106	-0.11554	0.40318	1.02234	0.66262	0.52142	0.72128	1.19049	0.7164	-0.04692	-0.56484	0.01956	1.67278	0.49129	0.76591	-0.38618	0.0575	0.06331	0.47597	0.48586	0.233877
hsa-mir-362	-3.08568	-1.54238	-1.36067	-1.00102	-2.26373	-3.09236	-4.11624	-0.94524	-2.08742	-3.00027	-2.92929	-2.87834	-3.44137	-1.43997	-1.93837	-2.25878	-3.13954	-1.58068	-1.982	-2.96841	-2.22115	-2.29057	-1.61896	-1.37984	-1.28928	-2.26044	-3.77766	-0.60118	0.08864	0.25907	-0.6006	0.60941	-3.30403	-2.54959	-1.10272	-0.39278	-1.86521	-3.13727	-3.47434	-3.92938	-1.3559	-3.06365	-2.89402	-3.96246	-4.20368	-2.79665	-0.94193	-3.162	0.665063
hsa-mir-362	-2.51505	-1.01582	-1.0996	-1.49277	-2.90689	-3.0671	-3.94803	-0.53725	-1.85068	-2.24905	-3.13703	-3.06974	-3.81382	-0.6472	-2.06274	-2.95463	-3.42078	-2.04612	-2.95606	-3.20248	-2.48481	-2.49055	-1.75343	-1.37984	-1.47499	-2.26044	-3.33359	-0.71369	-0.10802	-0.3231	-0.82703	0.79463	-3.4968	-2.50665	-0.96546	-0.4184	-1.77069	-2.54443	-3.62272	-3.92938	-1.15967	-3.18581	-2.89402	-3.96246	-4.24903	-2.7205	-1.58091	-3.162	0.867918
hsa-mir-363	-4.00187	-3.41228	-3.64656	-3.61457	-3.39764	-3.45342	-4.11624	-3.68703	-0.95295	-3.0705	-3.45364	-3.52926	-4.41023	-3.80239	-3.63916	-3.09348	-3.86184	1.06667	1.14777	2.12916	-4.38761	3.86847	-3.16745	-1.37984	3.17019	-2.26044	-4.2572	2.769	0.37047	-2.60742	-4.65498	4.53919	-3.4968	-3.60636	-0.87957	5.24944	-1.79951	-2.02806	1.25058	1.51088	-3.36612	-3.62418	-0.42514	-3.96246	-4.51288	-3.49615	-4.54925	-3.162	0.0502038
hsa-mir-365-1	3.45265	4.80411	-2.26737	1.01969	0.53989	1.53123	1.19834	0.51865	4.10493	0.97886	1.79968	1.07724	2.93947	2.15197	1.40812	1.57512	3.5343	1.54668	1.15513	0.59266	-0.85889	-3.21575	-1.74083	0.79831	-2.90568	-2.23398	1.92411	2.96997	1.88209	0.98316	2.44675	1.32765	3.07572	2.19586	1.77769	1.13299	2.38876	0.23414	3.53365	3.24612	1.22875	3.0682	3.64923	2.2736	2.8822	3.1628	3.33446	2.47645	0.915658
hsa-mir-365-2	3.45265	4.80411	-2.26737	1.01969	0.53989	1.53123	1.19834	0.51865	4.10493	0.97886	1.79968	1.07724	2.93947	2.15197	1.40812	1.57512	3.5343	1.54668	1.15513	0.59266	-0.85889	-3.21575	-1.74083	0.79831	-2.90568	-2.23398	1.92411	2.96997	1.88209	0.98316	2.44675	1.32765	3.07572	2.19586	1.77769	1.13299	2.38876	0.23414	3.53365	3.24612	1.22875	3.0682	3.64923	2.2736	2.8822	3.1628	3.33446	2.47645	0.915658
hsa-mir-370	-4.00187	-3.41228	-3.64656	-3.61457	-3.39764	-3.45342	-4.11624	-3.68703	-4.28534	-3.0705	-3.45364	-3.52926	-3.01181	-3.02804	-2.58011	-3.09348	-3.79816	-2.14585	-3.69773	-3.20248	-4.38761	-2.29702	-3.16745	-1.37984	-3.20055	-2.26044	-3.52723	-3.97961	-3.67336	-2.60742	-4.13741	-3.22795	-3.4968	-3.60636	-3.45223	-3.90315	-4.02758	-3.7852	-3.54881	-3.92938	-3.36612	-3.62418	-2.89402	-3.8792	-4.51288	-3.49615	-4.54925	-3.162	0.219258
hsa-mir-371	-2.13189	-1.77938	-2.03223	-0.46365	-1.08419	-0.89844	-3.26417	-2.48548	-3.14457	-3.0599	-2.39286	-0.74325	-2.62822	-0.57032	-1.28457	-1.23523	-2.24253	-2.19082	-1.8864	-1.05134	-1.68761	-0.07084	-2.31458	-1.27502	-3.20055	-2.15658	0.4333	-0.8454	-2.80893	-2.32837	-1.57749	-2.44306	-2.4149	-2.01351	-3.13524	-3.28894	-1.45866	-3.5499	-0.14033	-2.18154	-2.26364	-3.06004	-2.27003	-0.14006	-1.09124	-2.09582	-0.83224	-2.18716	0.413407
hsa-mir-374	1.51402	2.33992	1.86592	2.02183	1.23177	1.09691	1.83491	1.6888	1.85215	0.60909	1.53058	2.24893	1.4298	-0.0232	1.73379	1.86257	2.00092	2.07783	2.99283	2.15848	2.07135	0.6589	2.62061	1.61667	2.25877	1.81201	1.14437	2.20661	1.68837	1.03106	1.12085	1.42725	2.23048	1.95275	2.6827	2.57779	1.47787	0.70752	1.18278	1.30991	2.36544	2.12683	1.11877	-0.23496	1.09865	1.2048	1.72132	0.769	0.882792
hsa-miR-374b	1.21321	1.95144	0.63288	1.52584	0.1606	0.14841	1.01823	1.22649	1.22678	1.09193	0.64025	1.09054	0.4188	-0.50577	-0.14859	0.47501	0.90337	0.86234	2.18743	1.03757	1.32638	-0.19219	1.59643	1.14191	1.60264	1.59812	0.27392	0.94594	1.02701	0.36084	0.24029	0.92513	1.10556	1.56999	2.34179	2.18811	0.87083	0.3727	-0.07293	0.40681	2.00879	1.64819	0.07459	-0.58887	0.68899	0.63353	0.71718	0.50452	0.593933
hsa-mir-375	2.34886	1.95825	-2.44325	-1.86374	-3.23495	0.85129	-0.32018	-2.19166	-4.28534	-3.0705	-3.45364	-3.52926	-4.41023	-3.80239	-3.63916	-3.09348	-3.86184	-4.30556	-3.69773	-3.20248	2.6097	-3.54526	-3.16745	-1.37984	-3.20055	-2.26044	-4.2572	-3.97961	-3.67336	-2.60742	-4.65498	-3.22795	-3.4968	-3.60636	-3.72134	-3.90315	-4.02758	-3.7852	-3.66053	-3.92938	-1.65996	-3.62418	-2.89402	-3.96246	-4.51288	-3.49615	-4.54925	-3.162	0.000550734
hsa-mir-376a-2	-2.9123	-3.41228	-3.64656	-3.61457	-3.39764	-3.45342	-4.11624	-3.68703	-4.28534	-3.0705	-3.45364	-3.52926	0.99761	-1.04882	1.43598	-0.1635	-0.94341	1.69644	-2.19832	-0.42573	-4.38761	-3.54526	-3.16745	-1.37984	-3.20055	-2.26044	-4.2572	-3.97961	-3.67336	-2.60742	-4.65498	-3.22795	-1.53384	-3.60636	0.9381	-3.90315	-4.02758	-3.7852	-3.66053	-3.92938	-3.35658	-3.62418	-2.89402	-0.25438	-4.51288	-3.11459	-4.54925	-3.162	0.0723356
hsa-mir-376a-1	-2.9123	-3.41228	-3.64656	-3.61457	-3.39764	-3.45342	-4.11624	-3.68703	-4.28534	-3.0705	-3.45364	-3.52926	0.99761	-1.04882	1.43598	-0.1635	-0.94341	1.69644	-2.19832	-0.42573	-4.38761	-3.54526	-3.16745	-1.37984	-3.20055	-2.26044	-4.2572	-3.97961	-3.67336	-2.60742	-4.65498	-3.22795	-1.53384	-3.60636	0.9381	-3.90315	-4.02758	-3.7852	-3.66053	-3.92938	-3.35658	-3.62418	-2.89402	-0.25438	-4.51288	-3.11459	-4.54925	-3.162	0.0723356
hsa-mir-376b	-4.00187	-3.41228	-3.64656	-3.61457	-3.39764	-3.45342	-4.11624	-3.68703	-4.28534	-3.0705	-3.45364	-3.52926	-1.00306	-3.57732	-0.19478	-2.78945	-3.34471	-0.5805	-3.69773	-2.03921	-4.38761	-3.54526	-3.16745	-1.37984	-3.20055	-2.26044	-4.2572	-3.97961	-3.67336	-2.60742	-4.65498	-3.22795	-3.46372	-3.60636	-1.1564	-3.90315	-4.02758	-3.7852	-3.66053	-3.92938	-3.36612	-3.62418	-2.89402	-2.11684	-4.51288	-3.49615	-4.54925	-3.162	0.148083
hsa-mir-368	-2.66379	-3.41228	-3.64656	-3.61457	-3.39764	-3.45342	-4.11624	-3.68703	-4.28534	-3.0705	-3.45364	-3.52926	1.16994	-1.18007	1.51187	-0.06362	-0.75365	1.84367	-1.79692	0.01179	-4.38761	-3.54526	-3.16745	-1.37984	-3.20055	-2.26044	-4.2572	-3.97961	-3.67336	-2.60742	-4.65498	-3.22795	-1.1478	-3.60636	0.76843	-3.90315	-4.02758	-3.7852	-3.66053	-3.92938	-3.20985	-3.62418	-2.89402	-0.22322	-4.51288	-2.54676	-4.54925	-3.162	0.068134
hsa-mir-377	-3.31042	-3.41228	-3.64656	-3.61457	-3.39764	-3.45342	-4.11624	-3.68703	-4.28534	-3.0705	-3.45364	-3.52926	0.47241	-1.4425	0.71281	-0.7766	-1.5856	1.06286	-2.60833	-0.59471	-4.38761	-3.54526	-3.16745	-1.37984	-3.20055	-2.26044	-4.2572	-3.97961	-3.67336	-2.60742	-4.65498	-3.22795	-1.94116	-3.60636	0.51274	-3.90315	-4.02758	-3.7852	-3.66053	-3.92938	-3.36612	-3.62418	-2.89402	-0.77356	-4.51288	-3.29989	-4.54925	-3.162	0.0723013
hsa-mir-378	-0.91305	-1.58844	-1.13063	0.21687	-0.76637	-0.50174	-2.31241	-0.09465	-2.79893	0.362	-0.71905	-1.60349	-2.96957	-0.46804	-2.11466	-1.16429	-2.20001	-3.7928	-3.04603	-2.78707	-1.63145	0.9095	2.40656	1.58402	0.45651	-0.95165	-0.07893	0.4306	-1.60749	-0.63781	0.57893	-0.0007	-2.33571	-1.50741	-1.75602	-1.76191	0.51048	-1.4581	-0.35629	-1.40338	0.19085	-2.14406	-2.89402	-0.95818	-1.67936	-1.30736	-1.63218	-1.2621	0.717559
hsa-mir-378	-3.32023	-3.41228	-3.64656	-2.31937	-3.39764	-2.87528	-4.11624	-2.0825	-4.28534	-1.01743	-2.21835	-3.52926	-4.41023	-3.80239	-3.63916	-3.09348	-3.80921	-4.30556	-3.69773	-3.20248	-4.38761	-2.61272	-0.60363	0.66338	-1.00743	-2.26044	-3.33609	-2.41896	-3.40857	-1.95931	-3.00254	-1.10506	-3.4968	-3.26281	-3.43279	-3.22556	-2.72999	-3.11801	-3.63877	-2.7785	-1.41175	-3.58139	-2.89402	-3.96246	-4.51288	-3.20923	-4.54925	-2.71546	0.916427
hsa-mir-379	-4.00187	-3.41228	-3.64656	-3.61457	-3.39764	-3.45342	-4.11624	-3.68703	-4.28534	-3.0705	-3.37167	-3.52926	-0.85153	-2.64303	-0.88007	-2.79255	-3.25614	-0.42392	-3.69773	-2.36267	-4.38761	-3.54526	-3.16745	-1.35313	-3.20055	-2.26044	-4.2572	-3.97961	-3.67336	-2.60742	-4.65498	-3.15297	-3.4968	-3.60636	-1.10775	-3.90315	-4.02758	-3.58548	-3.66053	-3.92938	-3.27587	-3.45872	-2.89402	-2.82953	-4.51288	-2.62061	-4.54925	-3.162	0.117579
hsa-mir-381	-4.00187	-3.41228	-3.64656	-3.61457	-3.39764	-3.45342	-4.11624	-3.68703	-4.28534	-3.0705	-3.45364	-3.52926	-0.19092	-2.87115	-0.2689	-1.98607	-3.06402	-0.4221	-3.52456	-1.20752	-4.38761	-3.54526	-3.16745	-1.37984	-3.20055	-2.26044	-4.2572	-3.97961	-3.67336	-2.60742	-4.65498	-3.22795	-3.05698	-3.60636	-0.76491	-3.90315	-4.02758	-3.7852	-3.66053	-3.92938	-3.36612	-3.62418	-2.89402	-1.61089	-4.51288	-3.49615	-4.54925	-3.162	0.0984978
hsa-mir-382	-4.00187	-3.41228	-3.64656	-3.61457	-3.39764	-3.45342	-4.11624	-3.68703	-4.28534	-3.0705	-3.45364	-3.52926	-1.12774	-3.60911	-0.97392	-2.78722	-3.3005	-0.43123	-3.69773	-2.44662	-4.38761	-3.54526	-3.16745	-1.37984	-3.20055	-2.26044	-4.2572	-3.97961	-3.67336	-2.60742	-4.65498	-3.22795	-3.4968	-3.60636	-1.48091	-3.90315	-4.02758	-3.7852	-3.66053	-3.92938	-3.36612	-3.62418	-2.89402	-3.11895	-4.51288	-3.49615	-4.54925	-3.162	0.174141
hsa-mir-409	-3.85603	-3.41228	-3.64656	-3.61457	-3.39764	-3.45342	-4.11624	-3.68703	-4.28534	-3.0705	-3.45364	-3.52926	-0.13358	-2.1623	0.20102	-1.94761	-2.4476	0.61294	-3.09472	-1.2989	-4.38761	-3.54526	-3.16745	-1.37984	-3.20055	-2.26044	-4.2572	-3.97961	-3.67336	-2.60742	-4.65498	-3.22795	-3.1541	-3.60636	-0.05349	-3.90315	-4.02758	-3.7852	-3.66053	-3.92938	-3.36612	-3.62418	-2.89402	-2.14277	-4.51288	-3.49615	-4.54925	-3.162	0.0934623
hsa-mir-421	-2.63323	-1.44139	-3.64656	-3.61457	-3.39764	-3.38162	-4.04576	-3.52138	-2.51816	-3.0705	-3.45364	-3.52926	-4.25951	-3.62144	-3.60493	-3.09348	-3.86184	-4.24424	-3.06369	-3.09175	-3.11685	-3.22434	-2.30676	-1.37984	-3.20055	-2.26044	-3.53322	-3.36125	-3.67336	-2.60742	-2.88656	-3.22795	-3.4968	-3.60636	-1.08598	-1.79681	-2.34989	-3.7852	-3.38576	-3.92938	-2.71922	-2.70045	-2.89402	-3.4744	-3.44854	-3.49615	-3.50685	-3.162	0.928547
hsa-mir-423	-3.66353	-2.19939	-2.94013	-3.24525	-3.08002	-2.68652	-3.74275	-2.73408	-3.8236	-3.0705	-3.45364	-3.34386	-4.19689	-3.19926	-3.09849	-2.73643	-3.71213	-3.99833	-3.25329	-3.20248	-3.876	-1.7057	-2.01463	-1.37984	-3.16704	-2.26044	-3.16228	-3.04187	-3.67336	-2.60742	-3.19585	-3.22795	-3.3402	-3.36009	-3.71219	-3.62848	-2.82372	-3.7852	-2.8663	-3.92938	-3.36612	-3.62418	-2.89402	-2.82447	-3.2102	-3.49615	-3.68034	-3.162	0.868756
hsa-mir-423	-0.6026	0.91043	0.17992	-0.16063	-0.56802	-0.26295	-0.40175	0.27088	-0.15792	0.3047	-1.14278	-0.45736	-1.1514	-1.10428	-0.4963	0.2207	-0.77994	-1.13744	-0.28328	-0.55676	-1.12593	-0.16796	0.95416	0.34911	0.69991	0.04675	-0.3144	-0.22002	-0.43903	-0.55239	-0.68613	-0.92427	0.02087	-0.1007	0.00474	-1.10165	-0.15323	-0.77215	-0.63362	-0.57698	-0.53546	-0.68307	-0.36196	-0.08369	-0.41476	-1.1411	-1.05362	-0.45615	0.11201
hsa-mir-424	1.29574	-3.41228	-1.18462	-3.61457	-2.1569	-0.16167	-3.99769	-1.4745	0.58699	-0.71566	-0.11254	3.38124	-4.41023	3.87719	4.19315	0.6289	2.40984	1.8935	1.26384	1.98701	0.68911	2.12545	1.37175	0.47091	1.94202	0.40412	0.81702	0.28954	-0.14449	0.08551	0.72181	0.94343	2.11385	1.59165	2.2491	-1.8639	1.92027	0.20995	4.12291	3.83635	1.44193	2.08591	4.36795	1.44372	0.84474	3.0476	6.84324	0.08495	3.64914e-05
hsa-mir-424	-3.92314	-3.41228	-3.64656	-3.22772	-3.39764	-3.45342	-4.11624	-3.68703	-4.28534	-3.0705	-3.45364	-3.37572	-4.41023	-1.09601	-1.94626	-3.09348	-3.56106	-4.16171	-3.69773	-3.20248	-4.26303	-0.43789	-2.54678	-1.37984	-3.1337	-2.26044	-4.2572	-3.89117	-3.67336	-2.60742	-3.87128	-3.22795	-3.4968	-3.30935	-3.91625	-3.90315	-3.87575	-3.7852	-1.73687	-3.89785	-3.33803	-3.62418	-1.76164	-3.04656	-4.43217	-3.26927	0.5789	-3.162	0.143645
hsa-mir-425	1.78777	3.02956	2.0217	2.27488	0.98694	1.73733	1.00453	1.4042	1.85724	1.45914	0.61068	1.0937	-0.04968	1.23197	0.11191	0.22016	0.5004	-0.18538	0.5157	0.04475	1.25226	1.61649	3.85457	1.90698	1.55563	0.60646	-0.11549	0.21809	1.61303	0.16379	0.23524	-0.10044	1.33531	1.61594	1.97444	2.62045	0.09089	1.61608	0.41509	0.72146	1.91835	0.9944	0.15913	-0.40072	0.1329	0.11896	1.49171	0.73042	0.0109804
hsa-mir-425	-3.87571	-2.5734	-3.60805	-3.20158	-2.68055	-2.69285	-4.05923	-3.42116	-4.28534	-2.9719	-3.22259	-3.52174	-4.35687	-2.86649	-2.66822	-2.46063	-3.76613	-4.30556	-3.69773	-2.20622	-3.71741	-1.91156	-1.98563	-1.37984	-3.20055	-2.26044	-3.5178	-3.34573	-3.67336	-2.60742	-3.5095	-3.22795	-3.12763	-3.60236	-3.91625	-3.02378	-3.3592	-3.7852	-2.86891	-3.92938	-3.36612	-3.56411	-2.89402	-3.3556	-3.72298	-3.49615	-3.51797	-3.162	0.612719
hsa-mir-429	2.04716	2.84648	4.025	2.78204	1.15824	1.70013	3.73138	3.65636	2.66653	1.76289	2.03037	-3.52926	-4.41023	-3.80239	-3.63916	-3.09348	-3.86184	-4.30556	-3.69773	-3.20248	1.62097	-3.54526	-3.16745	-1.37984	-3.20055	-2.26044	-2.13941	-3.97961	-3.67336	-2.60742	-4.65498	-3.22795	-3.4968	-1.13461	-3.91625	-3.90315	-0.74212	2.35499	-2.99381	-2.91862	-0.85088	2.03492	-0.65761	-0.59792	-0.06265	1.73799	-4.54925	1.0788	8.79989e-10
hsa-mir-431	-4.00187	-3.41228	-3.64656	-3.61457	-3.39764	-3.45342	-4.11624	-3.68703	-4.28534	-3.0705	-3.45364	-3.52926	-2.25777	-2.76711	-1.50473	-3.09348	-3.72197	-1.26892	-3.69773	-3.20248	-4.38761	-3.54526	-3.16745	-1.37984	-3.20055	-2.26044	-4.2572	-3.97961	-3.67336	-2.60742	-4.65498	-3.22795	-3.4968	-3.60636	-0.70459	-3.90315	-4.02758	-3.7852	-3.66053	-3.92938	-3.36612	-3.62418	-2.89402	-3.96246	-4.51288	-3.49615	-4.54925	-3.162	0.232604
hsa-mir-431	-3.0043	-3.41228	-3.44673	-3.09193	-1.61736	-1.57665	-4.11624	-3.0771	-4.28534	-2.90899	-3.04372	-2.83261	-3.52595	-1.56021	-1.77655	-1.55331	-3.51397	-3.43936	-2.52192	-1.50237	-0.30971	-0.834	0.18154	-1.37984	-3.20055	-2.26044	-2.39237	-1.17292	-3.67336	-2.60742	-2.71745	-3.22795	-3.4968	-3.55304	-3.91625	-3.85924	-1.51603	-3.7852	-1.50381	-3.92938	-3.36612	-3.62418	-2.89402	-1.41623	-2	-3.49615	-2.72059	-3.09849	0.160904
hsa-mir-432	-3.71305	-3.41228	-3.64656	-3.61457	-3.39764	-3.45342	-4.11624	-3.68703	-4.2165	-3.0705	-3.45364	-3.52926	-1.7278	-2.34497	-0.86286	-2.8654	-3.46979	-0.58325	-3.13645	-2.61639	-3.40251	-1.92232	-2.21941	-1.37984	-3.20055	-2.26044	-3.25182	-2.75715	-3.67336	-2.60742	-3.58677	-3.22795	-3.4968	-3.60636	-0.61052	-3.90315	-3.90097	-3.7852	-2.40432	-3.92938	-3.36612	-3.50141	-2.89402	-0.81234	-2.9929	-3.49615	-2.70679	-3.162	0.00752255
hsa-mir-450-1	-1.39323	-3.41228	-3.64656	-3.61457	-3.39764	-3.45342	-4.11624	-3.68703	-3.2081	-3.0705	-3.45364	-2.2873	-4.41023	-2.44853	-0.68665	-3.09348	-1.35215	-1.07959	-2.29063	-1.39913	-2.98382	-1.17766	-2.48547	-1.37984	-2.91616	-2.26044	-4.20391	-2.32175	-3.67336	-2.60742	-2.9159	-3.22795	-1.97194	-3.60636	-1.54609	-3.90315	-2.14535	-3.7852	-3.45621	-3.92938	-2.46879	-3.3289	-1.40177	-2.21698	-3.45724	-1.97115	-0.87483	-3.162	0.0223227
hsa-mir-450-2	-1.39323	-3.41228	-3.64656	-3.61457	-3.39764	-3.45342	-4.11624	-3.68703	-3.2081	-3.0705	-3.45364	-2.2873	-4.41023	-2.44853	-0.68665	-3.09348	-1.35215	-1.07959	-2.29063	-1.39913	-2.98382	-1.17766	-2.48547	-1.37984	-2.91616	-2.26044	-4.20391	-2.32175	-3.67336	-2.60742	-2.9159	-3.22795	-1.97194	-3.60636	-1.54609	-3.90315	-2.14535	-3.7852	-3.45621	-3.92938	-2.46879	-3.3289	-1.40177	-2.21698	-3.45724	-1.97115	-0.87483	-3.162	0.0223227
hsa-mir-452	-4.00187	-3.41228	-3.29491	-3.49898	-3.39764	-3.45342	-1.20974	-3.68703	-4.08842	-3.0705	-3.45364	-3.52926	-4.09797	-2.13201	-3.63916	-3.09348	-3.86184	-4.30556	-3.69773	-3.20248	-4.38761	-3.11945	-3.16745	-1.18961	-3.20055	-2.26044	-4.2572	-3.97961	-3.67336	-2.60742	-4.46805	-3.22795	-0.90977	-2.6888	-3.91625	-3.90315	-4.02758	-3.52577	-3.66053	-3.92938	-3.36612	-3.62418	-2.89402	-3.96246	-2.97022	-3.49615	-3.36895	-3.162	0.880981
hsa-mir-454	-0.0163	-0.25766	-1.58147	-2.23625	-3.12365	-2.18754	-1.48101	-2.3357	-1.79195	-3.02735	-2.91102	-1.15711	-3.0052	-3.65731	-1.9187	-2.04664	-1.57892	-2.52222	-1.42085	-2.30675	-2.68374	-1.02032	-1.11961	-1.37984	0.01882	-2.26044	-2.02685	-2.90948	-1.39585	-2.33304	-2.61762	-3.21817	-1.25959	-2.20167	-2.22925	-0.8225	-1.83019	-2.47206	-0.94266	-0.34765	-1.44795	-2.65026	-2.79837	-2.21844	-1.19579	-3.20143	-2.20443	-1.70579	0.885443
hsa-mir-455	-1.95413	-3.41228	-3.64656	-3.61457	-0.48201	-3.45342	0.20997	-3.08579	-3.5718	-1.26611	-3.41099	0.19328	0.11171	-3.11372	-0.61775	0.07487	1.32258	-0.27587	0.53242	-0.09689	-4.38761	-3.54526	-3.16745	-1.37984	-3.20055	-2.26044	1.46475	1.3822	-0.85105	-2.4482	0.89158	-0.3706	0.60882	-0.58831	-3.16741	-3.90315	0.8234	-3.12427	0.64163	0	-3.36612	1.67812	2.26679	0.24205	0.55706	1.59298	0.56484	1.23141	0.00388853
hsa-mir-455	-3.76027	-3.41228	-3.64656	-3.61457	-3.10581	-3.45342	-1.90878	-3.68703	-4.28534	-3.0705	-3.45364	-2.29751	-2.61549	-3.80239	-3.43118	-2.40062	-0.86214	-2.47422	-2.07271	-2.72778	-4.38761	-3.54526	-3.16745	-1.37984	-3.20055	-2.26044	-0.85172	-1.25716	-3.44	-2.60742	-1.75201	-2.93093	-2.40185	-3.17575	-3.91625	-3.82469	-1.85076	-3.7852	-2.15943	-1.65476	-3.36612	-0.95327	0.43016	-2.53395	-2.30691	-0.4292	-2.06462	-1.4467	0.00566115
hsa-mir-483	-2.54271	-2.19335	-2.02481	-1.15889	-1.46975	-1.42426	-2.70151	-2.29064	-2.0288	-3.0705	-3.26952	-2.05722	-2.81911	0.01061	-0.97587	-0.8922	-2.23071	-2.63409	-2.10045	-1.09516	-1.30886	1.07538	-0.40671	-1.26436	-1.85595	-0.03857	-0.32807	-0.76827	-3.15966	-2.53981	-0.6648	-2.81867	-2.22392	-1.86395	-2.82489	-3.55958	-0.99345	-3.21018	-0.39085	-3.73063	-2.54625	-3.07434	-2.29559	-0.47667	-1.48906	-2.10136	-1.04825	-2.75319	0.192538
hsa-mir-484	-0.30993	-0.47796	-1.25853	-0.70865	-1.69761	-0.58395	-1.47827	-0.49895	-2.77465	-1.24921	-1.19414	-0.94662	-1.42328	-1.65741	-0.94793	-0.32154	-1.16019	-2.15073	-1.45181	-1.25675	-0.58258	0.68994	-0.05405	-1.27901	0.26738	-1.30917	-1.42857	-1.07864	-2.81668	-1.9594	-1.86943	-1.51716	-1.28616	-2.32531	-2.19511	-2.52891	-0.71666	-1.2701	-0.32309	-1.12557	-2.32071	-1.99191	-1.66575	-0.43576	-2.49273	-1.90995	-0.28689	-1.54991	0.458117
hsa-mir-486	-4.00187	-3.41228	-3.64656	-3.61457	-3.39764	-3.45342	-4.11624	-3.68703	-4.28534	-3.0705	-3.45364	-3.52926	-4.24616	-3.80239	-3.63916	-3.09348	-3.86184	-4.28502	-3.66574	-3.20248	-4.38761	-3.54526	-3.16745	1.38936	-3.20055	-2.26044	-4.2572	-3.97961	-3.67336	-2.60742	-4.65498	-3.22795	-3.4968	-3.60636	-2.65847	-3.90315	-0.08973	-3.7852	-3.66053	-3.92938	-3.36612	-3.62418	-2.89402	-3.96246	-4.51288	-3.49615	-3.39347	-3.162	0.411229
hsa-mir-486	-4.00187	-3.41228	-3.64656	-3.61457	-3.39764	-3.45342	-4.11624	-3.68703	-4.28534	-3.0705	-3.45364	-2.48799	-2.88542	-0.80705	-3.63916	-3.09348	-3.86184	-3.34014	-3.19465	-2.58895	-3.42856	-2.09542	-3.16745	3.07673	-3.20055	-1.82134	-3.98246	-3.97961	-3.67336	-2.60742	-3.63159	-3.22795	-3.4968	-3.60636	1.09722	-3.90315	1.66103	-3.7852	-3.21199	-3.92938	-3.36612	-3.62418	-2.89402	-3.85439	-3.62695	-3.49615	-2.83883	-3.162	0.0881649
hsa-mir-487b	-1.82427	-1.99824	-1.96639	-2.39761	-1.52217	-2.26808	-3.41209	-3.13884	-3.75372	-3.0705	-3.45364	-1.37304	0.0971	-0.93498	0.77948	-0.16369	-1.31369	0.74476	-1.10557	0.4187	-1.29298	-1.10299	-1.3626	-1.37984	-3.20055	-2.26044	-1.7414	-0.96283	-3.67336	-2.60742	-1.7166	-3.22795	-1.72161	-3.47243	0.73354	-3.90315	-2.06547	-3.76106	-0.4248	-3.23823	-2.89851	-3.12925	-2.83763	0.04794	-1.53043	-2.25557	0.11189	-2.92644	0.0307401
hsa-mir-493	-3.80756	-3.41228	-3.64656	-3.61457	-3.39764	-3.45342	-4.11624	-3.68703	-4.28534	-3.0705	-3.45364	-3.52926	-0.30238	-3.19522	-0.23714	-3.05826	-2.29653	0.27463	-3.67148	-2.12995	-4.38761	-3.54526	-3.16745	-1.37984	-3.20055	-2.26044	-4.2572	-3.97961	-3.67336	-2.60742	-4.65498	-3.22795	-3.30047	-3.60636	-0.43248	-3.90315	-4.02758	-3.7852	-3.66053	-3.92938	-3.36612	-3.62418	-2.89402	-2.56636	-4.51288	-3.49615	-4.54925	-3.162	0.142081
hsa-mir-494	2.18344	2.24615	3.60615	3.75798	2.44998	2.61733	2.74258	3.47544	1.22883	2.06179	1.24993	2.71921	1.48819	5.37669	3.67989	3.04636	2.65468	2.91834	2.91383	3.28563	3.33946	7.02124	3.83394	2.98725	2.18283	5.27812	3.24122	3.46031	1.9463	2.85735	4.56775	1.94012	2.38818	3.33101	1.70707	1.26356	3.13812	0.9042	4.36811	0.86447	2.26759	1.07732	3.94005	3.96954	2.65539	2.95717	3.30875	2.67891	0.227441
hsa-mir-495	-3.70169	-3.41228	-3.64656	-3.61457	-3.39764	-3.45342	-4.11624	-3.68703	-4.28534	-3.0705	-3.45364	-3.52926	-0.81015	-2.61998	-0.19003	-2.6432	-2.72437	-0.11386	-3.47259	-2.04478	-4.38761	-3.54526	-3.16745	-1.37984	-3.20055	-2.26044	-4.2572	-3.97961	-3.67336	-2.60742	-4.65498	-3.22795	-2.77549	-3.60636	-0.29327	-3.90315	-4.02758	-3.7852	-3.66053	-3.92938	-3.36612	-3.62418	-2.89402	-1.46599	-4.51288	-3.49615	-4.54925	-3.162	0.111866
hsa-mir-497	0.03593	-1.05343	-3.64656	-3.61457	-3.39764	-3.45342	-4.11624	-3.68703	-4.28534	-3.0705	-3.45364	-3.52926	0.32295	-0.82109	-1.53558	-3.09348	-2.32877	-1.71611	-2.57698	-3.20248	-4.38761	-3.54526	-3.16745	-1.37984	-3.20055	-2.26044	-3.91326	-3.48951	-3.67336	-2.60742	-4.59509	-1.22712	-3.4968	-3.60636	-0.64207	-3.90315	-4.02758	-3.7852	-3.19311	-1.6939	-3.36612	-3.62418	-2.74588	-3.90365	-4.51288	-3.49615	-3.67944	-2.7461	0.736294
hsa-mir-498	-3.96515	-3.28966	-3.5953	-3.30673	-3.31017	-3.40324	-4.0106	-3.68703	-4.28534	-3.0705	-3.45364	-3.2599	-2.60299	-2.66789	-3.42096	-2.91379	-3.86184	-4.26003	-3.4329	-3.20248	-4.3032	-1.56536	-3.06622	-1.28836	-3.20055	-2.26044	-2.91116	-3.32695	-2.85862	-2.60742	-3.16597	-3.22795	-3.4968	-3.17077	-3.69604	-3.51805	-3.73046	-3.7852	-2.89775	-3.92938	-3.21145	-3.52515	-2.89402	-2.80895	-3.53891	-3.49615	-3.53762	-3.162	0.0503083
hsa-mir-500	-2.14758	-1.92869	-2.04795	-1.93539	-0.99947	-0.91005	-3.20356	-2.746	-3.26569	-1.7544	-2.14176	-2.23747	-2.77329	-0.68942	-0.87081	-0.32515	-2.39091	-2.8593	-1.98271	-0.57613	-1.23729	-0.06715	0.04222	-1.37984	-2.09074	-2.11682	0.0589	-0.10959	-3.12989	-2.28817	0.14705	-3.04187	-2.74733	-2.56549	-2.74995	-3.7717	-0.09125	-2.90643	-0.43952	-3.42755	-2.35627	-2.50682	-1.96267	0.37042	-0.32559	-2.54687	-0.23758	-2.30486	0.242776
hsa-mir-500	-3.73352	-1.84889	-2.42062	-1.94817	-3.17092	-3.45342	-4.11624	-1.53032	-2.54234	-2.92588	-3.45364	-3.52926	-4.13443	-1.43923	-2.82115	-3.09348	-3.67807	-2.49392	-3.19202	-3.20248	-3.42174	-2.54875	-2.83033	-1.37984	-2.43707	-2.26044	-4.05235	-1.52082	-0.73536	-0.34648	-0.95832	0.09044	-3.4968	-3.3983	-1.50215	-0.80796	-2.46803	-3.43947	-3.63533	-3.92938	-2.07949	-3.49953	-2.89402	-3.96246	-4.43865	-3.37278	-2.17335	-3.162	0.64067
hsa-mir-501	-4.00187	-3.41228	-3.41031	-2.92948	-3.39764	-3.45342	-4.11624	-2.18359	-4.28534	-3.0705	-3.45364	-3.52926	-4.41023	-2.24382	-3.35954	-3.09348	-3.86184	-3.49354	-3.69773	-3.20248	-3.79033	-2.92945	-3.16745	-1.37984	-3.20055	-2.26044	-4.2572	-2.26182	-2.18172	-1.33344	-2.3791	-0.94432	-3.4968	-3.60636	-3.02503	-2.75374	-3.13755	-3.7852	-3.66053	-3.92938	-3.18443	-3.62418	-2.89402	-3.96246	-4.51288	-3.49615	-3.15364	-3.162	0.293492
hsa-mir-501	-2.64002	-1.99139	-2.61891	-2.37906	-1.28404	-1.59784	-3.71765	-3.14737	-3.32699	-1.94441	-2.88728	-2.85738	-3.30614	-0.87014	-1.44505	-0.72364	-3.07874	-3.56509	-2.72874	-1.23009	-1.73574	-0.87564	-0.60342	-1.37984	-2.56903	-2.18191	-0.17855	-0.61984	-3.14829	-2.50357	-0.11532	-3.04894	-3.31815	-3.077	-2.60938	-2.6698	-0.18571	-3.32296	-0.87206	-3.92938	-2.80398	-3.15287	-2.89402	-0.33876	-0.84216	-3.07764	-1.08546	-2.90505	0.233078
hsa-mir-502	-3.95109	-2.57927	-2.89093	-2.00292	-3.39764	-3.45342	-4.11624	-1.8275	-3.14862	-3.0705	-3.45364	-3.52926	-4.41023	-2.21621	-3.52156	-3.09348	-3.86184	-3.01194	-3.5455	-3.20248	-3.88482	-3.22637	-3.16745	-1.37984	-2.98679	-2.26044	-4.2572	-2.0291	-1.17273	-0.58695	-1.64667	-0.16205	-3.4968	-3.60636	-2.18188	-1.99692	-3.1569	-3.78503	-3.66053	-3.92938	-2.67213	-3.62418	-2.89402	-3.96246	-4.51288	-3.49615	-2.46831	-3.162	0.733158
hsa-mir-502	-3.91924	-2.96539	-3.34402	-3.44106	-3.39764	-3.45342	-4.11624	-2.72675	-3.93838	-2.90175	-2.90446	-3.52926	-4.41023	-3.0175	-3.63916	-3.09348	-3.86184	-4.12251	-3.69773	-3.20248	-4.38761	-3.54526	-3.16745	-1.0411	-3.20055	-2.26044	-4.2572	-2.69093	-2.18139	-1.73879	-2.28729	-0.97851	-3.4968	-3.60636	-3.04959	-2.25094	-3.77266	-3.45941	-3.66053	-3.76349	-2.83341	-2.97079	-2.89402	-3.96246	-4.42506	-3.39352	-3.50431	-3.162	0.524671
hsa-mir-503	-2.07238	-3.41228	-3.64656	-3.61457	-3.39764	-3.45342	-4.11624	-3.68703	-3.49451	-3.0705	-3.12359	-0.14261	-4.41023	0.82152	0.55207	-3.09348	-1.55189	-1.91574	-2.92022	-1.83698	-3.30994	-1.71925	-3.16745	-1.37984	-0.91774	-2.08218	-3.777	-3.97961	-3.65169	-2.60742	-4.05196	-2.62405	-1.88515	-2.495	-0.6656	-3.90315	-1.2817	-2.3846	-0.18748	-0.1174	-2.46534	-0.56845	2.24858	-2.65831	-3.00499	0.24094	1.88295	-2.82919	0.00439933
hsa-mir-505	-0.73456	-2.07237	-3.64656	-1.64929	-1.20708	-1.42254	-4.11624	-1.02737	-2.98502	0.27382	-0.954	-1.58245	-1.25309	-0.19072	-0.67466	-1.87961	-1.89669	-1.94996	-0.30232	-0.7791	-1.02211	-1.3875	-0.29128	-0.41484	-0.38427	-2.26044	-1.12775	-1.72921	-1.26725	-2.60742	-1.55652	-1.52871	-1.28399	-1.53058	-1.05309	0.52285	-0.77312	-2.65418	-2.35243	-2.291	-0.56219	-1.2623	-1.3412	-2.88637	-1.57552	-1.60698	-1.21775	-1.88876	0.177984
hsa-mir-505	-2.87172	-3.41228	-3.64656	-3.45761	-3.39764	-3.45342	-4.11624	-3.40873	-4.28534	-1.39255	-2.78476	-3.52926	-4.03978	-3.18163	-3.48918	-3.09348	-3.86184	-4.30556	-3.27575	-3.20248	-4.3029	-3.54526	-3.16745	-1.37984	-2.37675	-2.26044	-3.81565	-3.97961	-3.43842	-2.60742	-4.33421	-2.95262	-3.4968	-3.60636	-2.66126	-1.66845	-3.18021	-3.7852	-3.66053	-3.92938	-2.66801	-3.24468	-2.89402	-3.96246	-4.51288	-3.49615	-4.54925	-3.162	0.769237
hsa-mir-506	-4.00187	-3.41228	-3.64656	-3.61457	-3.39764	-3.45342	-4.11624	-3.68703	-4.28534	-3.0705	-3.45364	-3.52926	-4.41023	-3.80239	-3.63916	-3.09348	-3.86184	-4.30556	-3.69773	-3.20248	-4.38761	-3.54526	-3.16745	-1.37984	-3.20055	-2.26044	-4.13173	-3.97961	-0.23457	-1.28868	-2.67948	-1.03049	-3.4968	-3.60636	-3.91625	-3.55819	-4.02758	-3.7852	-3.66053	-3.92938	-3.36612	-3.62418	-2.89402	-3.96246	-4.33389	-3.49615	-4.42241	-3.162	0.332038
hsa-mir-507	-4.00187	-3.41228	-3.64656	-3.61457	-3.39764	-3.45342	-4.11624	-3.68703	-4.28534	-3.0705	-3.45364	-3.52926	-4.41023	-3.80239	-3.63916	-3.09348	-3.86184	-4.30556	-3.69773	-3.20248	-4.38761	-3.54526	-3.16745	-1.37984	-3.20055	-2.26044	-4.2572	-3.97961	-0.90422	-2.1241	-3.62095	-2.00649	-3.4968	-3.60636	-3.91625	-3.90315	-4.02758	-3.7852	-3.66053	-3.92938	-3.36612	-3.62418	-2.89402	-3.96246	-4.51288	-3.49615	-4.54925	-3.162	0.481393
hsa-mir-508	-4.00187	-3.41228	-3.64656	-3.61457	-3.39764	-3.45342	-4.11624	-3.68703	-4.28534	-3.0705	-3.45364	-3.52926	-4.41023	-3.80239	-3.63916	-3.09348	-3.86184	-4.30556	-3.69773	-3.20248	-4.38761	-3.54526	-3.16745	-1.37984	-3.20055	-2.26044	-3.89018	-3.95984	-1.13551	-2.58838	-2.91799	-2.0659	-3.4968	-3.60636	-3.91625	-3.90315	-4.02758	-3.7852	-3.66053	-3.92938	-3.36612	-3.62418	-2.89402	-3.89499	-4.45824	-3.49615	-4.35058	-3.162	0.4106
hsa-miR-509-3-5p	-4.00187	-3.41228	-3.64656	-3.61457	-3.39764	-3.45342	-4.11624	-3.68703	-4.28534	-3.0705	-3.45364	-3.52926	-4.41023	-3.38879	-3.63916	-3.09348	-3.86184	-4.30556	-3.69773	-3.20248	-4.38761	-2.8783	-3.16745	-1.37984	-3.20055	-2.26044	-4.2572	-3.97961	-0.4185	-0.16351	-3.75515	-0.08411	-3.4968	-3.60636	-3.91625	-3.90315	-4.02758	-3.7852	-3.66053	-3.92938	-3.36612	-3.62418	-2.89402	-3.96246	-4.51288	-3.49615	-4.54925	-3.162	0.349574
hsa-miR-509-3p	-4.00187	-3.41228	-3.64656	-3.61457	-3.39764	-3.45342	-4.11624	-3.68703	-4.28534	-3.0705	-3.45364	-3.52926	-4.41023	-3.80239	-3.63916	-3.09348	-3.86184	-4.30556	-3.69773	-3.20248	-4.38761	-3.54526	-3.16745	-1.37984	-3.20055	-2.26044	-4.2572	-3.97961	0.30475	-0.90758	-2.74608	-0.49061	-3.4968	-3.60636	-3.91625	-3.90315	-4.02758	-3.7852	-3.66053	-3.92938	-3.36612	-3.62418	-2.89402	-3.96246	-4.51288	-3.49615	-4.54925	-3.162	0.360943
hsa-miR-509-3-5p	-4.00187	-3.41228	-3.64656	-3.61457	-3.39764	-3.45342	-4.11624	-3.68703	-4.28534	-3.0705	-3.45364	-3.52926	-4.41023	-3.80239	-3.63916	-3.09348	-3.86184	-4.30556	-3.69773	-3.20248	-4.38761	-3.54526	-3.16745	-1.37984	-3.20055	-2.26044	-4.2572	-3.97961	0.30475	-0.90758	-2.74608	-0.49061	-3.4968	-3.60636	-3.91625	-3.90315	-4.02758	-3.7852	-3.66053	-3.92938	-3.36612	-3.62418	-2.89402	-3.96246	-4.51288	-3.49615	-4.54925	-3.162	0.360943
hsa-mir-509	-4.00187	-3.41228	-3.64656	-3.61457	-3.39764	-3.45342	-4.11624	-3.68703	-4.28534	-3.0705	-3.45364	-3.52926	-4.41023	-3.80239	-3.63916	-3.09348	-3.86184	-4.30556	-3.69773	-3.20248	-4.38761	-3.54526	-3.16745	-1.37984	-3.20055	-2.26044	-4.2572	-3.97961	0.30475	-0.90758	-2.74608	-0.49061	-3.4968	-3.60636	-3.91625	-3.90315	-4.02758	-3.7852	-3.66053	-3.92938	-3.36612	-3.62418	-2.89402	-3.96246	-4.51288	-3.49615	-4.54925	-3.162	0.360943
hsa-miR-509-3p	-4.00187	-3.41228	-3.64656	-3.61457	-3.39764	-3.45342	-4.11624	-3.68703	-4.28534	-3.0705	-3.45364	-3.52926	-4.41023	-3.62185	-3.63916	-3.09348	-3.86184	-4.30556	-3.69773	-3.20248	-4.38761	-2.08724	-3.16745	-1.37984	-3.20055	-2.26044	-4.2572	-3.97961	0.01265	-1.98206	-2.87312	-1.49605	-3.4968	-3.60636	-3.91625	-3.90315	-4.02758	-3.7852	-3.53992	-3.92938	-3.36612	-3.62418	-2.89402	-3.96246	-4.51288	-3.49615	-4.54925	-3.162	0.334504
hsa-mir-509	-4.00187	-3.41228	-3.64656	-3.61457	-3.39764	-3.45342	-4.11624	-3.68703	-4.28534	-3.0705	-3.45364	-3.52926	-4.41023	-3.62185	-3.63916	-3.09348	-3.86184	-4.30556	-3.69773	-3.20248	-4.38761	-2.08724	-3.16745	-1.37984	-3.20055	-2.26044	-4.2572	-3.97961	0.01265	-1.98206	-2.87312	-1.49605	-3.4968	-3.60636	-3.91625	-3.90315	-4.02758	-3.7852	-3.53992	-3.92938	-3.36612	-3.62418	-2.89402	-3.96246	-4.51288	-3.49615	-4.54925	-3.162	0.334504
hsa-mir-510	-4.00187	-3.41228	-3.64656	-3.61457	-3.39764	-3.45342	-4.11624	-3.68703	-4.28534	-3.0705	-3.45364	-3.52926	-4.41023	-3.80239	-3.63916	-3.09348	-3.86184	-4.30556	-3.69773	-3.20248	-4.38761	-3.54526	-3.16745	-1.37984	-3.20055	-2.26044	-4.2572	-3.97961	-1.34499	-2.47897	-3.98146	-2.33761	-3.4968	-3.60636	-3.91625	-3.90315	-4.02758	-3.7852	-3.66053	-3.92938	-3.36612	-3.62418	-2.89402	-3.96246	-4.51288	-3.49615	-4.54925	-3.162	0.553967
hsa-mir-512-1	-4.00187	-3.41228	-3.64656	-3.61457	-3.39764	-3.45342	-4.11624	-3.68703	-4.28534	-3.0705	-3.45364	-3.52926	-1.72163	-2.9222	-3.63916	-3.09348	-3.86184	-4.30556	-3.69773	-3.20248	-4.38761	-1.48799	-3.16745	-1.37984	-3.20055	-2.26044	-3.78011	-3.97961	-2.38543	-2.60742	-3.22635	-3.22795	-3.4968	-3.60636	-3.91625	-3.90315	-3.41688	-3.7852	-2.4858	-3.92938	-3.36612	-3.62418	-2.89402	-3.33746	-4.51288	-3.49615	-4.3056	-3.162	0.153883
hsa-mir-512-2	-4.00187	-3.41228	-3.64656	-3.61457	-3.39764	-3.45342	-4.11624	-3.68703	-4.28534	-3.0705	-3.45364	-3.52926	-1.72163	-2.9222	-3.63916	-3.09348	-3.86184	-4.30556	-3.69773	-3.20248	-4.38761	-1.48799	-3.16745	-1.37984	-3.20055	-2.26044	-3.78011	-3.97961	-2.38543	-2.60742	-3.22635	-3.22795	-3.4968	-3.60636	-3.91625	-3.90315	-3.41688	-3.7852	-2.4858	-3.92938	-3.36612	-3.62418	-2.89402	-3.33746	-4.51288	-3.49615	-4.3056	-3.162	0.153883
hsa-mir-513-1	-2.4416	-2.43527	-1.08277	-0.86686	-0.98877	-0.9725	-2.64679	-1.84786	-4.03537	-3.0705	-3.45364	-1.83692	-3.35973	1.06653	-0.27332	-0.68365	-2.09185	-1.95567	-1.57556	-0.33277	-0.24009	3.00604	0.47254	-1.37984	-3.15957	-0.86367	0.14336	0.30788	1.65343	0.603	1.14721	0.64905	-2.74178	-1.95688	-3.33627	-3.90315	0.09389	-3.7852	0.91045	-3.92938	-2.83587	-3.62418	-0.50383	1.16792	-0.35458	-2.60736	0.16075	-2.3154	0.0557189
hsa-mir-513-2	-2.4416	-2.43527	-1.08277	-0.86686	-0.98877	-0.9725	-2.64679	-1.84786	-4.03537	-3.0705	-3.45364	-1.83692	-3.35973	1.06653	-0.27332	-0.68365	-2.09185	-1.95567	-1.57556	-0.33277	-0.24009	3.00604	0.47254	-1.37984	-3.15957	-0.86367	0.14336	0.30788	1.65343	0.603	1.14721	0.64905	-2.74178	-1.95688	-3.33627	-3.90315	0.09389	-3.7852	0.91045	-3.92938	-2.83587	-3.62418	-0.50383	1.16792	-0.35458	-2.60736	0.16075	-2.3154	0.0557189
hsa-miR-513b	-3.2292	-3.24868	-1.71825	-1.81521	-2.2349	-2.24899	-3.46566	-2.96481	-4.28534	-3.0705	-3.45364	-2.9311	-4.03556	-0.20124	-1.26309	-2.03896	-2.94863	-2.71482	-2.61169	-1.428	-1.39559	1.61855	-0.72475	-1.37984	-3.20055	-1.62888	-1.07774	-0.84835	0.80477	-0.58062	0.15231	-0.03479	-3.4968	-3.0169	-3.91625	-3.90315	-1.02367	-3.7852	-0.29791	-3.92938	-3.26218	-3.62418	-2.51695	-0.1773	-1.50185	-3.19348	-0.91702	-2.89774	0.0407228
hsa-miR-513c	-4.00187	-3.41228	-3.13541	-3.27953	-3.31078	-3.43845	-4.11624	-3.68703	-4.28534	-3.0705	-3.45364	-3.52926	-4.41023	-1.37997	-2.4967	-2.82261	-3.8484	-3.95775	-3.69315	-2.53502	-2.67892	0.3234	-2.00776	-1.37984	-3.20055	-2.26044	-2.47062	-2.14609	0.53536	-0.62483	-1.09422	-0.49487	-3.4968	-3.60636	-3.91625	-3.90315	-2.27295	-3.7852	-1.67551	-3.92938	-3.36612	-3.62418	-2.89402	-1.55875	-2.95982	-3.49615	-2.36905	-3.162	0.0152539
hsa-mir-514-1	-4.00187	-3.41228	-3.64656	-3.61457	-3.39764	-3.45342	-4.11624	-3.68703	-4.28534	-3.0705	-3.45364	-3.52926	-4.41023	-3.80239	-3.63916	-3.09348	-3.86184	-4.30556	-3.69773	-3.20248	-4.38761	-3.54526	-3.16745	-1.37984	-3.20055	-2.26044	-4.2572	-3.67249	1.41762	-0.14144	-1.46996	0.28569	-3.4968	-3.60636	-3.91625	-3.90315	-4.02758	-3.7852	-3.66053	-3.92938	-3.36612	-3.62418	-2.89402	-3.96246	-4.51288	-3.49615	-4.54925	-3.162	0.303732
hsa-mir-514-2	-4.00187	-3.41228	-3.64656	-3.61457	-3.39764	-3.45342	-4.11624	-3.68703	-4.28534	-3.0705	-3.45364	-3.52926	-4.41023	-3.80239	-3.63916	-3.09348	-3.86184	-4.30556	-3.69773	-3.20248	-4.38761	-3.54526	-3.16745	-1.37984	-3.20055	-2.26044	-4.2572	-3.67249	1.41762	-0.14144	-1.46996	0.28569	-3.4968	-3.60636	-3.91625	-3.90315	-4.02758	-3.7852	-3.66053	-3.92938	-3.36612	-3.62418	-2.89402	-3.96246	-4.51288	-3.49615	-4.54925	-3.162	0.303732
hsa-mir-514-3	-4.00187	-3.41228	-3.64656	-3.61457	-3.39764	-3.45342	-4.11624	-3.68703	-4.28534	-3.0705	-3.45364	-3.52926	-4.41023	-3.80239	-3.63916	-3.09348	-3.86184	-4.30556	-3.69773	-3.20248	-4.38761	-3.54526	-3.16745	-1.37984	-3.20055	-2.26044	-4.2572	-3.67249	1.41762	-0.14144	-1.46996	0.28569	-3.4968	-3.60636	-3.91625	-3.90315	-4.02758	-3.7852	-3.66053	-3.92938	-3.36612	-3.62418	-2.89402	-3.96246	-4.51288	-3.49615	-4.54925	-3.162	0.303732
hsa-mir-516-1	-4.00187	-3.41228	-3.64656	-3.61457	-3.39764	-2.74686	-4.11624	-3.68703	-4.17454	-3.05327	-2.11174	-3.52926	-4.17055	-3.12317	-2.69806	-3.09348	-3.86184	-4.30556	-3.69773	-3.20248	-4.38761	-2.08653	-3.16745	-1.37984	-3.20055	-2.26044	-3.70461	-3.97961	-3.67336	-2.60742	-3.80153	-3.22795	-3.4968	-3.60636	-3.91625	-3.90315	-3.94156	-3.7852	-1.12269	-0.78895	-3.36612	-3.62418	-2.89402	-3.84465	-4.51288	-3.49615	-2.79702	-3.162	0.546789
hsa-mir-516-2	-4.00187	-3.41228	-3.64656	-3.61457	-3.39764	-2.74686	-4.11624	-3.68703	-4.17454	-3.05327	-2.11174	-3.52926	-4.17055	-3.12317	-2.69806	-3.09348	-3.86184	-4.30556	-3.69773	-3.20248	-4.38761	-2.08653	-3.16745	-1.37984	-3.20055	-2.26044	-3.70461	-3.97961	-3.67336	-2.60742	-3.80153	-3.22795	-3.4968	-3.60636	-3.91625	-3.90315	-3.94156	-3.7852	-1.12269	-0.78895	-3.36612	-3.62418	-2.89402	-3.84465	-4.51288	-3.49615	-2.79702	-3.162	0.546789
hsa-mir-517a	-4.00187	-3.41228	-3.64656	-3.61457	-3.39764	-2.1192	-4.11624	-3.68703	-4.12669	-3.0705	-2.15984	-3.50861	-1.02811	-3.80239	-2.19676	-3.09348	-3.86184	-4.30556	-3.69773	-3.20248	-4.38761	-3.54526	-3.16745	-1.37984	-3.20055	-2.26044	-4.2572	-3.97961	-1.58028	-2.60742	-4.65498	-3.22795	-3.4968	-3.60636	-3.91625	-3.90315	-4.02758	-3.7852	-0.69296	-1.39254	-3.36612	-3.62418	-2.89402	-3.96246	-4.51288	-3.49615	-2.4334	-3.162	0.593304
hsa-mir-517c	-4.00187	-3.41228	-3.64656	-3.61457	-3.39764	-0.58078	-4.11624	-3.68703	-2.01297	-0.3765	0.98773	-2.23521	-2.13037	-3.80239	-0.69719	-3.09348	-3.86184	-4.30556	-3.69773	-3.20248	-4.38761	-3.54526	-3.16745	-1.37984	-3.20055	-2.26044	-4.2572	-3.97961	-2.35175	-2.60742	-4.65498	-3.22795	-3.4968	-3.60636	-3.91625	-3.90315	-3.69058	-3.7852	0.41623	1.878	-3.36612	-3.62418	-2.89402	-3.96246	-4.51288	-3.49615	-1.55158	-3.162	0.309575
hsa-mir-518a-1	-4.00187	-3.41228	-3.64656	-3.61457	-3.39764	-3.45342	-4.11624	-3.68703	-4.28534	-2.75483	-2.96321	-3.52926	-3.57468	-3.80239	-3.63916	-3.09348	-3.86184	-4.30556	-3.69773	-3.20248	-4.38761	-3.54526	-3.16745	-0.93118	-3.20055	-2.26044	-4.2572	-3.97961	-3.08773	-2.60742	-4.65498	-3.15369	-3.4968	-3.60636	-3.91625	-3.12738	-4.02758	-3.68107	-3.66053	-3.37243	-3.34935	-3.21297	-2.89402	-3.96246	-4.51288	-3.36715	-4.54925	-2.94612	0.74731
hsa-mir-518a-2	-4.00187	-3.41228	-3.64656	-3.61457	-3.39764	-3.45342	-4.11624	-3.68703	-4.28534	-2.75483	-2.96321	-3.52926	-3.57468	-3.80239	-3.63916	-3.09348	-3.86184	-4.30556	-3.69773	-3.20248	-4.38761	-3.54526	-3.16745	-0.93118	-3.20055	-2.26044	-4.2572	-3.97961	-3.08773	-2.60742	-4.65498	-3.15369	-3.4968	-3.60636	-3.91625	-3.12738	-4.02758	-3.68107	-3.66053	-3.37243	-3.34935	-3.21297	-2.89402	-3.96246	-4.51288	-3.36715	-4.54925	-2.94612	0.74731
hsa-mir-518e	-4.00187	-3.41228	-3.64656	-3.61457	-3.39764	-3.45342	-4.11624	-3.68703	-4.28534	-2.80772	-2.48783	-3.52926	-4.12936	-3.80239	-3.63916	-3.09348	-3.86184	-4.30556	-3.69773	-3.20248	-4.38761	-3.54526	-3.16745	-1.02683	-3.20055	-1.95988	-4.2572	-3.97961	-3.19675	-2.60742	-4.65498	-2.79764	-3.4968	-3.60636	-3.91625	-3.83571	-4.02758	-3.1848	-3.66053	-3.38942	-3.26941	-3.01675	-2.6613	-3.96246	-4.51288	-3.30434	-4.54925	-2.97085	0.866854
hsa-mir-519a-1	-4.00187	-3.41228	-3.64656	-3.61457	-3.39764	-1.81117	-4.11624	-3.68703	-3.62695	-2.86908	-1.62823	-3.3668	-2.98806	-3.80239	-1.6931	-3.09348	-3.86184	-4.30556	-3.69773	-3.20248	-4.38761	-3.54526	-3.16745	-1.37984	-3.20055	-2.26044	-4.2572	-3.97961	-3.67336	-2.60742	-4.65498	-3.22795	-3.4968	-3.60636	-3.91625	-3.90315	-4.02758	-3.7852	-0.38664	-0.74532	-3.36612	-3.62418	-2.89402	-3.96246	-4.51288	-3.49615	-2.30129	-3.162	0.928566
hsa-mir-519a-2	-4.00187	-3.41228	-3.64656	-3.61457	-3.39764	-1.81117	-4.11624	-3.68703	-3.62695	-2.86908	-1.62823	-3.3668	-2.98806	-3.80239	-1.6931	-3.09348	-3.86184	-4.30556	-3.69773	-3.20248	-4.38761	-3.54526	-3.16745	-1.37984	-3.20055	-2.26044	-4.2572	-3.97961	-3.67336	-2.60742	-4.65498	-3.22795	-3.4968	-3.60636	-3.91625	-3.90315	-4.02758	-3.7852	-0.38664	-0.74532	-3.36612	-3.62418	-2.89402	-3.96246	-4.51288	-3.49615	-2.30129	-3.162	0.928566
hsa-mir-519e	-4.00187	-3.41228	-3.52191	-3.61457	-3.39764	-3.45342	-4.0298	-3.68703	-4.28534	-3.0705	-3.45364	-3.52926	-3.97693	-3.47573	-3.10052	-3.09348	-3.86184	-4.29031	-3.62883	-3.20248	-4.09848	-2.69732	-3.06135	-1.37984	-3.20055	-2.26044	-3.20839	-2.94899	-3.67336	-2.60742	-4.15862	-3.22795	-3.4968	-3.60636	-3.91625	-3.90315	-3.9228	-3.7852	-3.2297	-3.92938	-3.36612	-3.62418	-2.89402	-2.34083	-3.61948	-3.49615	-3.13807	-3.11638	0.147815
hsa-mir-521-2	-4.00187	-3.41228	-3.64656	-3.61457	-3.39764	-0.67969	-4.11624	-3.68703	-2.65225	-0.50963	0.43903	-2.42948	-3.37057	-3.80239	-1.1147	-3.09348	-3.86184	-4.30556	-3.69773	-3.20248	-4.38761	-3.54526	-3.16745	-0.83439	-3.20055	-2.26044	-4.2572	-3.97961	-3.18617	-2.60742	-4.41256	-3.22795	-3.4968	-3.60636	-3.91625	-3.09612	-3.61899	-3.7852	-0.25238	0.79368	-3.36612	-3.62418	-2.89402	-3.96246	-4.41531	-3.49615	-1.97357	-3.162	0.289769
hsa-mir-521-1	-4.00187	-3.41228	-3.64656	-3.61457	-3.39764	-0.67969	-4.11624	-3.68703	-2.65225	-0.50963	0.43903	-2.42948	-3.37057	-3.80239	-1.1147	-3.09348	-3.86184	-4.30556	-3.69773	-3.20248	-4.38761	-3.54526	-3.16745	-0.83439	-3.20055	-2.26044	-4.2572	-3.97961	-3.18617	-2.60742	-4.41256	-3.22795	-3.4968	-3.60636	-3.91625	-3.09612	-3.61899	-3.7852	-0.25238	0.79368	-3.36612	-3.62418	-2.89402	-3.96246	-4.41531	-3.49615	-1.97357	-3.162	0.289769
hsa-mir-522	-4.00187	-3.41228	-3.64656	-3.61457	-3.39764	-1.58888	-4.11624	-3.68703	-3.56128	-0.98707	-0.12671	-3.18071	-3.33194	-3.80239	-1.46402	-3.09348	-3.86184	-4.30556	-3.69773	-3.20248	-4.38761	-3.54526	-3.16745	-1.37984	-3.20055	-2.26044	-4.2572	-3.97961	-3.67336	-2.60742	-4.65498	-3.22795	-3.4968	-3.60636	-3.91625	-3.90315	-4.02758	-3.7852	-0.176	0.26079	-3.36612	-3.62418	-2.89402	-3.96246	-4.51288	-3.49615	-1.98985	-3.162	0.424221
hsa-mir-532	-3.47411	-1.76973	-1.62615	-1.76524	-2.88692	-3.21205	-4.11624	-1.57217	-2.58034	-2.3161	-3.32615	-3.4015	-4.41023	-1.29788	-2.21917	-3.08776	-3.80476	-2.18064	-3.19813	-3.08547	-2.82308	-2.8191	-2.24655	-1.37984	-2.19805	-2.26044	-3.89102	-1.35705	-0.51711	-0.6676	-1.11709	-0.28849	-3.4968	-3.36431	-1.90973	-0.72008	-2.14614	-3.26753	-3.66053	-3.92938	-1.74553	-3.37481	-2.89402	-3.96246	-4.49566	-3.4932	-1.88568	-3.162	0.965811
hsa-mir-532	-2.34159	-0.72952	-0.69429	-0.9621	-2.56173	-2.6968	-3.29626	-0.25348	-1.64933	-1.8341	-2.3868	-2.69475	-3.76335	-0.41362	-2.03948	-2.47824	-3.04055	-1.5562	-2.39546	-2.90845	-2.2992	-2.42507	-1.60344	-1.20365	-0.72158	-2.26044	-3.35136	-0.58158	0.37648	0.11522	-0.52254	1.09661	-3.18409	-2.68119	-0.65908	-0.04898	-1.62472	-2.25425	-3.30427	-2.77673	-0.75246	-2.62783	-2.89402	-3.96246	-4.16664	-2.47251	-1.34943	-3.162	0.642974
hsa-mir-539	-4.00187	-3.41228	-3.64656	-3.61457	-3.39764	-3.45342	-4.11624	-3.68703	-4.28534	-3.0705	-3.45364	-3.52926	-2.89607	-3.80239	-3.12909	-3.09348	-3.86184	-2.38199	-3.69773	-3.20248	-4.38761	-3.54526	-3.16745	-1.37984	-3.20055	-2.26044	-4.2572	-3.97961	-3.67336	-2.60742	-4.65498	-3.22795	-3.4968	-3.60636	-1.44404	-3.90315	-4.02758	-3.7852	-3.66053	-3.92938	-3.36612	-3.62418	-2.89402	-3.96246	-4.51288	-3.49615	-4.54925	-3.162	0.380564
hsa-mir-542	-2.28708	-3.41228	-3.64656	-3.61457	-3.39764	-3.45342	-4.11624	-3.68703	-3.48822	-3.0705	-3.45364	-2.91876	-4.41023	-2.43782	-1.51078	-3.09348	-1.79093	-1.70243	-3.16368	-2.37844	-4.08444	-1.95917	-3.16745	-1.37984	-3.19051	-2.26044	-4.2572	-3.5193	-3.67336	-2.60742	-4.04014	-3.22795	-1.97883	-3.60636	-1.39759	-3.90315	-3.18728	-3.7852	-3.66053	-3.92938	-2.4417	-2.58157	-0.85086	-3.89492	-4.51288	-1.52643	-2.42979	-3.162	0.100547
hsa-mir-542	-2.65687	-3.41228	-3.64656	-3.61457	-3.39764	-3.45342	-4.11624	-3.68703	-4.03815	-3.0705	-3.45364	-3.37801	-4.41023	-2.05324	-1.78699	-2.97701	-2.16834	-1.93019	-3.42955	-2.00959	-3.6028	-1.83154	-3.02174	-1.37984	-2.77503	-2.26044	-3.01876	-2.95408	-3.67336	-2.60742	-3.09847	-3.22795	-2.54191	-3.60636	-2.05928	-3.90315	-2.55994	-3.7852	-3.27663	-3.92938	-2.77279	-2.60571	-1.14848	-2.98802	-3.60763	-1.84363	-2.53874	-3.162	0.00631811
hsa-miR-543	-4.00187	-3.41228	-3.64656	-3.61457	-3.39764	-3.45342	-4.11624	-3.68703	-4.28534	-3.0705	-3.45364	-3.52926	-1.77481	-3.33355	-1.00267	-2.91316	-3.69002	-1.04391	-3.69773	-2.64387	-4.38761	-3.54526	-3.16745	-1.37984	-3.20055	-2.26044	-4.2572	-3.97961	-3.67336	-2.60742	-4.65498	-3.22795	-3.44342	-3.60636	-1.21551	-3.90315	-4.02758	-3.7852	-3.66053	-3.92938	-3.36612	-3.62418	-2.89402	-2.16331	-4.51288	-3.49615	-4.54925	-3.162	0.16535
hsa-mir-545	-4.00187	-3.38156	-3.64656	-3.61457	-3.39764	-3.45342	-4.11624	-3.68703	-3.71633	-3.0705	-3.45364	-3.52926	-4.41023	-3.80239	-3.63916	-3.09348	-3.86184	-4.20471	-3.21046	-3.20248	-4.38761	-3.54526	-3.16745	-1.37984	-3.20055	-2.26044	-4.2572	-3.97961	-3.67336	-2.60742	-4.64018	-3.22795	-3.4968	-3.60636	-2.93172	-2.92319	-4.02758	-3.7852	-3.66053	-3.92938	-3.26701	-2.94116	-2.89402	-3.96246	-4.51288	-3.49615	-4.54925	-3.162	0.742351
hsa-mir-550-1	-1.902	-2.43191	-2.85329	-1.92722	-2.20875	-2.04041	-1.71583	-1.937	-2.04873	-1.45031	-2.06517	-2.29806	-2.47178	-2.65509	-1.93741	-2.69143	-1.79513	-2.50149	-0.79944	-1.59309	-1.26704	-2.52485	-0.79861	0.69285	-1.26822	0	-3.34089	-2.33367	-1.2821	-1.50806	-2.85827	-1.37964	-2.53412	-1.36938	-2.13441	-0.36368	-2.93945	-1.7812	-3.66053	-3.49306	-2.0237	-0.80736	-0.96854	-2.11873	-4.00808	-1.67343	-2.46244	-0.81139	0.600888
hsa-mir-550-2	-1.902	-2.43191	-2.85329	-1.92722	-2.20875	-2.04041	-1.71583	-1.937	-2.04873	-1.45031	-2.06517	-2.29806	-2.47178	-2.65509	-1.93741	-2.69143	-1.79513	-2.50149	-0.79944	-1.59309	-1.26704	-2.52485	-0.79861	0.69285	-1.26822	0	-3.34089	-2.33367	-1.2821	-1.50806	-2.85827	-1.37964	-2.53412	-1.36938	-2.13441	-0.36368	-2.93945	-1.7812	-3.66053	-3.49306	-2.0237	-0.80736	-0.96854	-2.11873	-4.00808	-1.67343	-2.46244	-0.81139	0.600888
hsa-mir-551b	-4.00187	-3.41228	-3.64656	-3.61457	-3.2803	-3.45342	-4.11624	-3.68703	-1.50413	-1.02673	-2.39411	-1.62577	-1.35575	-3.80239	-3.63916	-3.09348	-0.80567	-4.30556	-3.69773	-2.53419	-4.38761	-3.54526	-3.16745	-1.37984	-3.20055	0.60694	-2.06234	0.26628	1.70629	2.13678	1.3781	-0.89545	-2.32153	-3.60636	-3.91625	0.57281	-4.02758	-3.7852	-3.66053	-3.92938	0.4701	-3.62418	-2.89402	-3.96246	-4.51288	-3.49615	-4.54925	-3.162	0.238863
hsa-mir-557	-4.00187	-3.41228	-3.64656	-3.61457	-3.39764	-3.45342	-4.11624	-3.68703	-4.28534	-3.0705	-3.44666	-3.52926	-4.41023	-2.93683	-3.63916	-3.09348	-3.86184	-4.30556	-3.69773	-3.20248	-4.38761	-2.16623	-3.16745	-1.10611	-3.20055	-2.26044	-2.89434	-3.97961	-3.67336	-2.60742	-3.39029	-3.22795	-3.4968	-3.60636	-3.91625	-3.6335	-4.02758	-3.7852	-3.62024	-3.92938	-3.36612	-3.57808	-2.89402	-3.06997	-4.13298	-3.49615	-4.2938	-3.162	0.296225
hsa-mir-572	-3.65758	-3.36631	-2.5363	-1.91881	-2.87708	-2.90685	-4.11624	-3.10478	-4.28534	-3.0705	-3.45364	-3.16106	-3.93293	-0.61255	-1.73783	-2.17416	-2.39772	-3.32539	-3.34037	-2.45336	-2.65228	0.58834	-1.60372	-1.37984	-3.1465	-1.49644	-1.20904	-2.08499	-3.67336	-2.60742	-2.61059	-3.22795	-3.4968	-3.07816	-3.91625	-3.90315	-2.79333	-3.7852	-1.41636	-3.92938	-3.36612	-3.62418	-2.89402	-1.46248	-2.56025	-3.49615	-2.329	-3.162	0.0933689
hsa-mir-574	-0.97324	-0.12083	-1.00966	-1.20957	-1.14246	-1.20858	-2.04191	-1.55596	-0.34574	-1.7636	-0.36399	-0.10182	-0.44243	-0.94115	-0.97922	-0.04489	-0.45917	-0.55421	-1.10267	-1.23505	-1.37242	0.04086	-0.81984	0.45091	-2.05373	-0.79714	-2.05434	-0.77905	0.62502	-0.74794	-0.7017	-0.15176	-0.26843	-0.03727	-0.01705	-1.12796	-1.76514	-0.77891	-0.31838	-0.18677	0.06723	0.14382	0.00969	-0.23461	-0.59877	-0.48528	-0.67403	-1.08486	0.0282737
hsa-mir-574	-0.39665	-0.06678	-0.16903	0.72092	0.02408	0.05918	-0.88089	-0.46097	0.32	-0.9272	-1.05871	0.56102	-0.00541	0.68311	0.43047	0.80214	0.2868	-0.25442	0.24368	-0.16582	-0.09797	1.92151	0.73971	-0.31157	-1.03773	0.33658	-0.62559	0.28804	0.44289	0.06741	0.39097	-0.00592	0.08496	-0.00446	0.87897	-1.38174	0.09082	-0.43615	0.81634	0.02168	-0.35951	0.32629	0.48219	0.65567	0.10397	0.19144	0.49562	-0.71907	0.0418597
hsa-mir-575	0.07482	-0.09481	0.2187	0.55492	0.94656	0.97135	-0.98393	-0.42176	-1.46886	0.00831	0.48791	0.12229	-0.55335	1.4513	0.8743	1.44991	-0.21096	-0.77238	0.02939	1.37888	1.2483	2.05063	1.83977	0.17643	0.44502	0.92148	2.16148	1.51353	-0.99971	-0.63844	1.64708	-1.08844	-0.53495	-0.25848	-0.90181	-1.42694	1.98797	-0.74923	1.6454	-0.88754	-0.52215	-0.25772	0.18921	2.06997	1.84976	-0.54572	1.53222	0.12325	0.255524
hsa-mir-582	-4.00187	-3.41228	-3.64656	-3.61457	-3.39764	-3.45342	-4.11624	-3.25062	-4.28534	-3.0705	-3.45364	-3.52926	-4.41023	-3.80239	-3.63916	-3.09348	-3.86184	-4.30556	-3.69773	-3.20248	-4.38761	-3.54526	-3.16745	-1.37984	-3.20055	-2.26044	-4.2572	-3.97961	-3.67336	-2.60742	-4.65498	-3.12935	-3.4968	-3.60636	-3.91625	-3.90315	-4.02758	-3.7852	-3.66053	-3.92938	-3.36612	-3.62418	-2.89402	-3.96246	-4.51288	-3.49615	-4.54925	-3.162	0.986369
hsa-mir-582	-4.00187	-2.30666	-2.53598	-3.06321	-3.39764	-3.44445	-2.45672	1.05794	-0.27396	-3.0705	-3.45364	-3.52926	-1.602	-3.33059	-3.63916	-0.51496	-3.20226	-3.10479	-3.59511	-1.36675	-0.66751	-3.54526	-3.16745	-1.37984	-3.20055	-2.26044	-1.04832	-0.83387	-1.34008	1.06079	-2.78972	1.0152	-3.4968	-2.37067	-3.76867	-3.90315	-4.02758	-3.4316	-3.66053	-3.92938	-1.17132	-2.7989	-2.89402	-2.99801	-2.58945	-2.69684	-4.54925	-3.162	0.873537
hsa-mir-584	-4.00187	-3.41228	-1.64444	-3.42085	-2.28308	-3.45342	-2.66955	-3.68703	-4.28534	-3.0705	-3.45364	-0.42733	-3.2159	-3.09497	-3.26339	-3.09348	-3.86184	-3.47664	-3.35178	-3.20248	-3.30705	-2.7695	-3.16745	-1.37984	-3.20055	-2.26044	-2.23974	-0.16718	-0.70732	-0.50054	-0.79413	0.1475	-3.4968	-0.84599	-3.91625	-3.90315	-2.02205	-3.12461	-2.83212	-3.92938	-1.33109	-3.62418	-2.89402	-3.15085	-3.56238	-3.49615	-3.05765	-3.162	0.108425
hsa-mir-590	0.19525	0.6828	-1.13608	-0.27987	0.34262	0.24388	0.20037	0.19684	-0.86431	-2.08943	0.19704	-0.55557	0.05013	-0.99423	-0.46666	-0.52787	-0.68024	-0.97326	0.19819	-0.70551	-0.01598	-0.90016	0.39054	1.6449	0.74661	1.36663	-1.44409	-0.49837	-0.13456	-0.45008	0.12152	-0.16682	-0.60059	0.28434	1.50405	0.39115	0.10394	-0.26919	-1.49585	-0.67374	0.25595	0.51759	-0.539	-1.3479	-2.00561	0.43452	-1.15959	0.03038	0.939728
hsa-mir-598	-4.00187	-3.41228	-3.36848	-3.14731	-3.39764	-3.45342	-1.45992	-3.68703	-4.28534	-2.91803	-3.27774	-1.67725	-3.07517	-3.80239	-2.89904	-3.09348	-2.11072	-1.30837	-2.64497	-3.20248	-4.38761	-3.54526	-3.16745	-1.37984	-3.20055	-2.26044	-4.2572	-3.97961	-3.67336	-2.60742	-2.94872	-2.66113	-3.34653	-3.60636	-3.01402	-3.44931	-4.02758	-3.7852	-3.66053	-3.92938	-1.90512	-3.16702	-2.89402	-3.96246	-4.51288	-2.29825	-4.54925	-3.162	0.608165
hsa-mir-601	-4.00187	-3.41228	-3.64656	-3.23335	-3.31692	-3.45342	-4.11624	-3.68703	-4.28534	-3.0705	-3.45364	-3.52926	-4.41023	-2.0078	-3.24223	-2.94556	-3.86184	-4.30556	-3.69773	-3.20248	-3.6013	-1.27037	-2.9279	-1.37984	-3.20055	-2.26044	-2.02344	-2.92126	-3.67336	-2.60742	-2.67151	-3.22795	-3.4968	-3.60636	-3.91625	-3.90315	-3.0271	-3.7852	-2.84849	-3.92938	-3.36612	-3.62418	-2.89402	-2.39194	-3.44048	-3.49615	-3.21004	-3.162	0.0580297
hsa-mir-602	-3.9735	-3.41228	-3.64656	-2.48166	-3.39764	-3.45342	-4.11624	-3.68703	-4.28534	-3.0705	-3.45364	-3.52926	-4.41023	-3.01828	-3.63916	-3.09348	-3.86184	-4.30556	-3.69773	-3.20248	-4.38761	-1.97612	-3.16745	-1.37984	-3.20055	-2.26044	-3.3503	-3.97961	-3.67336	-2.60742	-3.93552	-3.22795	-3.4968	-3.60636	-3.91625	-3.90315	-4.02758	-3.7852	-3.3327	-3.92938	-3.36612	-3.62418	-2.89402	-2.60125	-3.70779	-3.49615	-4.54925	-3.162	0.639883
hsa-mir-615	-3.5496	-1.29174	-3.64656	-3.61457	-3.39764	-3.1567	-4.11624	-3.68703	-4.28534	-3.0705	-3.24079	-3.52926	-4.23451	-3.80239	-3.38544	-3.09348	-3.86184	-4.30556	-3.69773	-3.20248	-3.54422	-3.54526	-3.16745	-0.96992	-3.20055	-2.26044	-4.2572	-3.97961	-3.61754	-2.60742	-4.31946	-3.22795	-3.4968	-3.60636	-3.91625	-3.13991	-4.02758	-3.7852	-3.66053	-3.51807	-3.36612	-3.05343	-2.89402	-3.96246	-4.30735	-3.49615	-4.43901	-3.162	0.568045
hsa-mir-622	-3.89112	-3.41228	-3.34704	-3.61457	-3.39764	-3.45342	-4.04045	-3.42973	-4.28534	-3.0705	-3.30482	-3.52926	-4.41023	-2.64522	-3.16284	-3.09348	-3.86184	-4.30556	-3.69773	-3.20248	-3.22928	-1.60103	-3.12916	-1.37984	-3.20055	-2.26044	-2.45898	-3.25996	-3.67336	-2.60742	-3.28412	-3.22795	-3.4968	-3.60636	-3.91625	-3.90315	-3.14108	-3.62988	-2.4452	-3.92938	-3.36612	-3.62418	-2.89402	-2.47124	-3.52805	-3.49615	-2.82094	-3.162	0.0877576
hsa-mir-623	-3.97747	-3.41228	-3.64656	-3.61457	-3.39764	-3.45342	-4.11624	-3.50046	-4.13147	-3.0705	-3.42003	-3.52926	-4.41023	-2.624	-3.63916	-3.07868	-3.86184	-4.30556	-3.28679	-3.20248	-3.53647	-1.50777	-2.5633	-1.23363	-3.20055	-2.26044	-2.79197	-3.64376	-3.66544	-2.60742	-3.0839	-3.22795	-3.4968	-3.49879	-3.72613	-3.36062	-3.96914	-3.7852	-2.48363	-3.92938	-3.36612	-2.84899	-2.70227	-1.88186	-3.43952	-3.49615	-3.30707	-3.162	0.0549575
hsa-mir-624	-4.00187	-3.41228	-3.64656	-3.61457	-3.33498	-3.45342	-4.11624	-3.68703	-4.28534	-3.0705	-3.45364	-3.52926	-4.41023	-3.80239	-3.63916	-3.09348	-3.86184	-4.30556	-3.69773	-3.20248	-4.38761	-3.54526	-3.16745	-1.34805	-3.14563	-2.26044	-4.2572	-3.97961	-3.67336	-2.60742	-4.65498	-3.22795	-3.4968	-3.60636	-3.91625	-3.90315	-4.0137	-3.7852	-3.66053	-3.92938	-3.36612	-3.62418	-2.89402	-3.96246	-4.51288	-3.49615	-4.54925	-3.162	0.884118
hsa-mir-625	-1.126	-3.41228	-0.09528	-0.93927	-2.19714	-2.26788	-3.93634	-0.56529	0.6884	-0.48805	-2.18716	-1.58877	-3.18344	-3.80239	-3.63916	-2.90281	-2.81096	-2.5418	-2.47051	-1.92699	-2.50895	-1.41288	-3.16745	-1.37984	0.72221	-1.94307	-3.1716	-3.33834	-1.83303	-2.24558	-4.19574	-2.17201	-1.96454	-0.44337	-1.97732	-2.42559	-3.12347	-0.57363	-2.33706	-1.0131	-1.15345	-0.97218	-2.89402	-3.96246	-4.51288	-2.41166	-2.8201	-1.99401	0.0480113
hsa-mir-629	-3.1075	-3.41228	-3.64656	-3.61457	-3.17529	-3.45342	-4.11624	-3.68703	-3.41375	-3.0705	-3.45364	-3.4446	-3.80443	-3.80239	-3.63916	-3.09348	-3.86184	-4.30556	-3.40394	-3.20248	-2.2515	-2.91883	-3.16745	-1.37984	-3.20055	-1.69832	-3.48838	-2.7568	-3.67336	-2.60742	-3.96571	-3.22795	-3.48426	-2.72571	-3.55226	-3.90315	-2.01908	-3.7852	-3.66053	-3.92938	-3.36612	-3.62418	-2.89402	-3.70133	-4.06939	-3.49615	-4.3268	-3.162	0.46422
hsa-mir-629	-3.46996	-3.41228	-3.54256	-1.2044	-2.51135	-3.45342	-4.11624	-3.10718	-3.81213	-2.93535	-3.42396	-3.25054	-4.02109	-3.14172	-3.48539	-3.09348	-3.86184	-4.30556	-2.81018	-3.20248	-3.1052	-2.04506	-3.16745	-1.2252	-2.705	-1.2873	-2.12721	-3.79915	-2.92117	-2.49019	-3.5805	-3.22795	-3.38232	-2.63726	-3.91625	-3.39323	-3.4731	-3.74348	-3.54744	-3.12372	-3.36612	-3.62418	-2.89162	-1.27517	-3.59634	-2.90805	-4.46644	-3.09041	0.806521
hsa-mir-630	-2.35821	-2.53865	0.03676	1.80295	-2.20111	-1.25916	-3.91505	-0.40702	-1.96022	-3.0705	-3.45364	1.36509	0.49767	2.50378	-0.75395	-0.43126	0.2813	-2.56394	-3.69773	-2.10301	-0.82551	1.31612	1.84445	-1.00644	1.34017	2.32327	3.95478	0.09339	-2.65595	-2.60742	-0.65263	-2.90613	-1.72765	-1.02435	-0.93351	0.5137	-1.35859	-3.64653	-1.06503	-3.92938	-3.21189	-3.12125	-2.34662	-1.14451	-2.00834	-1.22207	-1.7531	-3.162	0.227937
hsa-mir-636	-4.00187	-3.41228	-3.64656	-3.13788	-3.36956	-3.45342	-4.11624	-3.68703	-4.28534	-3.0705	-3.45364	-3.52926	-4.41023	-3.4049	-3.50064	-2.92215	-3.86184	-4.30556	-3.69773	-3.20248	-4.38761	-2.56024	-3.16745	-1.37984	-3.20055	-2.26044	-3.64999	-3.95806	-3.67336	-2.60742	-4.15185	-3.22795	-3.4968	-3.60636	-3.91625	-3.86002	-3.99633	-3.7852	-3.32281	-3.92938	-3.36612	-3.62418	-2.89402	-3.11558	-4.22136	-3.49615	-4.38193	-3.162	0.58735
hsa-mir-638	-0.34978	0.10003	0.85734	1.47246	0.3365	0.43338	-0.89843	0.15774	-1.03617	-0.42465	-0.85415	0.67078	-0.62127	2.60674	1.24051	1.15081	-0.16413	-0.14671	0.02948	0.80938	0.33086	3.47052	1.09541	1.47112	0.8048	2.25401	2.142	0.91181	-0.59096	-0.24297	1.12865	-0.33738	-0.43952	0.36853	-0.70203	-0.5517	0.4165	-0.94553	1.65053	-0.51811	-0.36467	-0.63735	-0.27656	1.30064	0.07094	-0.19642	0.38408	0.06726	0.151841
hsa-mir-650	-4.00187	-3.41228	-3.64656	-3.61457	-3.30111	-3.3957	-4.11624	-3.68703	-4.28534	-3.0705	-3.45364	-3.52926	-4.41023	-2.51179	-2.32291	-2.49128	-3.86184	-4.30556	-3.69773	-2.72121	-3.06687	-2.18339	-2.48654	-1.37984	-3.20055	-2.26044	-1.79442	-1.96977	-3.67336	-2.60742	-2.36875	-3.22795	-3.4968	-3.60636	-3.91625	-3.90315	-2.76485	-3.7852	-2.03256	-3.92938	-3.36612	-3.62418	-2.89402	-1.92556	-2.78972	-3.49615	-2.07551	-3.162	0.0113566
hsa-mir-652	-1.09718	-2.21281	-2.31416	-2.30832	-3.01193	-3.40378	-1.57609	-2.12146	-2.81739	-1.55208	-3.15081	-2.62929	-3.75228	-2.62354	-3.63916	-3.09348	-3.57932	-2.92975	-3.05172	-3.20248	-2.67314	-1.31757	-0.70404	-1.32445	-0.6538	-2.26044	-2.87011	-1.67347	-0.38511	-0.98781	-1.53445	-1.13044	-2.28323	-2.98678	-1.45848	-2.14032	-1.76807	-2.6097	-3.66053	-3.92938	-1.56267	-2.85144	-2.89402	-3.74586	-3.24211	-3.07745	-3.33597	-3.162	0.693991
hsa-mir-654	-3.85639	-3.41228	-3.64656	-3.61457	-3.39764	-3.45342	-4.11624	-3.68703	-4.28534	-3.0705	-3.45364	-3.52926	-0.40104	-2.37087	0.11373	-2.26476	-2.8346	0.03085	-3.42554	-1.37193	-4.38761	-3.54526	-3.16745	-1.0731	-3.20055	-2.26044	-4.2572	-3.97961	-3.67336	-2.60742	-4.37975	-3.22795	-3.18701	-3.60636	-0.65587	-3.29217	-4.02758	-3.7852	-3.66053	-3.92938	-3.36612	-3.62418	-2.89402	-2.05436	-4.39842	-3.49615	-4.54925	-3.162	0.0848644
hsa-mir-654	-4.00187	-3.41228	-3.64656	-3.61457	-3.39764	-3.45342	-4.11624	-3.68703	-4.28534	-3.0705	-3.45364	-3.52926	-4.10852	-2.87386	-3.18776	-3.09348	-3.86184	-3.13775	-3.69773	-3.20248	-4.38761	-1.50687	-3.16745	-1.37984	-3.20055	-2.26044	-3.69663	-3.97961	-3.67336	-2.60742	-3.68588	-3.22795	-3.4968	-3.60636	-3.83356	-3.90315	-4.02758	-3.7852	-3.36542	-3.92938	-3.36612	-3.62418	-2.89402	-3.77258	-4.51288	-3.49615	-4.54925	-3.162	0.309725
hsa-mir-660	-1.78878	-0.08504	-0.36419	-0.423	-1.85502	-2.4036	-3.07872	-0.13859	-0.85784	-2.09431	-2.05651	-2.0341	-3.10599	-0.2116	-1.35954	-2.25394	-2.49386	-0.98743	-1.95524	-2.45013	-1.9595	-1.80237	-1.08102	-1.22777	-0.69016	-2.26044	-2.80554	-0.26101	0.78299	0.68025	0.10397	0.99393	-2.98491	-2.4421	0.0042	0.50337	-1.08884	-2.08986	-3.05555	-2.49525	-0.36152	-2.11381	-2.89402	-3.84985	-3.47599	-2.24846	-0.79932	-3.162	0.617284
hsa-mir-663	-3.12829	-3.41228	-2.90523	0.52452	-1.42031	-2.45824	-3.11075	-1.14658	-2.90961	-1.8014	-2.65432	-2.64675	-4.09345	-1.0298	-1.51232	-2.99001	-3.48927	-3.38248	-2.14246	-2.69991	-2.80473	0	-2.68862	-1.26219	-1.74091	-0.17636	-0.99481	-2.71382	-3.01655	-1.84877	-1.63103	-3.11673	-2.47652	-1.50917	-2.56473	-3.79639	-2.83036	-2.80993	-1.37185	-0.71349	-2.77099	-3.62418	-2.2386	-0.47229	-2.90112	-2.52215	-3.00925	-2.292	0.897278
hsa-mir-671	-3.41587	-3.41228	-2.67243	-2.04961	-2.78002	-2.81178	-3.30936	-2.69627	-4.28534	-3.0705	-3.45364	-2.53559	-4.09494	-0.67353	-2.18314	-2.36307	-3.33565	-3.05657	-3.1912	-2.57021	-2.61813	0.57124	-2.01106	-1.37984	-3.16963	-1.26795	-1.77725	-2.19385	-3.67336	-2.60742	-2.12318	-3.22795	-3.37399	-2.90956	-3.91625	-3.90315	-2.47342	-3.73683	-1.75202	-3.92938	-3.32541	-3.62418	-2.89402	-1.71517	-3.2392	-3.30296	-2.71136	-3.162	0.210917
hsa-mir-7-1	3.03483	1.11347	3.18817	2.55145	3.1731	2.52641	3.34561	3.30614	0.31711	-0.2339	0.84434	1.49352	0.18791	-0.87397	0.42431	0.52264	0.90599	-1.09006	-0.67649	-0.46102	3.36866	0.63294	0.15476	1.15334	2.00932	2.73977	1.16358	0.68017	-0.78713	0.39465	-0.09109	0.62323	0.22708	0.4363	0.50634	1.07699	0.78061	0.87782	0.01346	-2.50155	-1.09304	0.23285	0.4258	-0.48256	0.82434	0.50897	0.4995	0.89836	7.11361e-05
hsa-mir-7-2	3.03483	1.11347	3.18817	2.55145	3.1731	2.52641	3.34561	3.30614	0.31711	-0.2339	0.84434	1.49352	0.18791	-0.87397	0.42431	0.52264	0.90599	-1.09006	-0.67649	-0.46102	3.36866	0.63294	0.15476	1.15334	2.00932	2.73977	1.16358	0.68017	-0.78713	0.39465	-0.09109	0.62323	0.22708	0.4363	0.50634	1.07699	0.78061	0.87782	0.01346	-2.50155	-1.09304	0.23285	0.4258	-0.48256	0.82434	0.50897	0.4995	0.89836	7.11361e-05
hsa-mir-7-3	3.03483	1.11347	3.18817	2.55145	3.1731	2.52641	3.34561	3.30614	0.31711	-0.2339	0.84434	1.49352	0.18791	-0.87397	0.42431	0.52264	0.90599	-1.09006	-0.67649	-0.46102	3.36866	0.63294	0.15476	1.15334	2.00932	2.73977	1.16358	0.68017	-0.78713	0.39465	-0.09109	0.62323	0.22708	0.4363	0.50634	1.07699	0.78061	0.87782	0.01346	-2.50155	-1.09304	0.23285	0.4258	-0.48256	0.82434	0.50897	0.4995	0.89836	7.11361e-05
hsa-mir-7-1	-1.16284	-2.12892	-0.98885	-0.70387	-0.35242	-0.27593	-1.1302	-0.39472	-2.21272	-1.63937	-2.96207	-2.37641	-2.83033	-3.80239	-2.50563	-2.72519	-1.75937	-3.41502	-2.52086	-2.50481	-0.60056	-0.91233	-0.97846	-0.91409	-0.08225	-1.08157	-2.60515	-1.41098	-2.79324	-1.85967	-3.23662	-2.2898	-2.02339	-2.12712	-3.30697	-2.30748	-2.70529	-2.9117	-2.53024	-3.92938	-2.31577	-3.28229	-2.89402	-3.27198	-2.53301	-2.78643	-2.38641	-2.17659	0.000935888
hsa-miR-744	-2.12266	-1.69313	-2.97807	-2.38125	-0.56831	-0.6368	-2.48135	-1.85694	-1.28535	0.04099	-1.54832	-1.66664	-1.65545	-2.05367	-1.43841	-2.68551	-2.37198	-2.10096	-1.00348	-0.82505	-4.38761	-1.42129	-2.25348	-1.37984	-1.56624	-2.26044	-2.94914	-2.78549	-3.62163	-2.60742	-1.97539	-3.22795	-0.89618	-3.0532	-1.07664	-0.76531	-1.23311	-1.63932	-2.91468	-2.95277	-2.14725	-1.16166	-2.89402	-3.38632	-2.57638	-2.62976	-2.13313	-2.44694	0.0624638
hsa-miR-744	-4.00187	-3.41228	-3.64656	-3.61457	-3.39764	-3.45342	-4.11624	-3.68703	-4.28534	-3.0705	-3.23692	-3.52926	-4.41023	-3.66173	-3.63916	-3.09348	-3.86184	-4.30556	-3.69773	-3.20248	-4.38761	-3.54526	-3.16745	-1.25926	-3.20055	-2.26044	-4.2572	-3.97961	-3.67336	-2.60742	-4.147	-3.22795	-3.4968	-3.60636	-3.91625	-3.14613	-4.02758	-3.7852	-3.66053	-3.92938	-3.36612	-3.5923	-2.89402	-2.91956	-3.7528	-3.49615	-3.82867	-3.162	0.529067
hsa-mir-758	-4.00187	-3.41228	-3.64656	-3.61457	-3.39764	-3.45342	-4.11624	-3.68703	-4.28534	-3.0705	-3.45364	-3.52926	-2.25885	-3.80239	-1.26511	-3.09348	-3.86184	-1.9161	-3.69773	-3.17236	-4.38761	-3.54526	-3.16745	-1.37984	-3.20055	-2.26044	-4.2572	-3.97961	-3.67336	-2.60742	-4.65498	-3.22795	-3.4968	-3.60636	-2.00264	-3.90315	-4.02758	-3.7852	-3.66053	-3.92938	-3.36612	-3.62418	-2.89402	-3.60465	-4.51288	-3.49615	-4.54925	-3.162	0.278592
hsa-miR-760	-4.00187	-3.41228	-3.64656	-3.42123	-2.93835	-3.32488	-4.11624	-3.68703	-4.28534	-3.0705	-3.45364	-3.52926	-4.41023	-1.61834	-2.89868	-2.21356	-3.86184	-4.30556	-3.69773	-2.98079	-2.79023	-0.95451	-2.16606	-1.37984	-3.20055	-2.26044	-1.83896	-2.45878	-3.67336	-2.60742	-1.88418	-3.22795	-3.4968	-3.60636	-3.91625	-3.90315	-2.10016	-3.7852	-2.42756	-3.92938	-3.36612	-3.62418	-2.89402	-1.94588	-2.79947	-3.49615	-2.82372	-3.162	0.0239428
hsa-mir-765	-3.89425	-3.31727	-3.13954	-2.90733	-3.25612	-3.12202	-3.89742	-3.68703	-4.28534	-3.0705	-3.45364	-3.48765	-4.16058	-1.35471	-2.60606	-2.37107	-3.56055	-4.09537	-3.34107	-3.00486	-2.48288	0.30027	-1.87653	-1.37984	-3.14482	-1.28112	-2.29752	-2.54075	-3.67336	-2.60742	-2.30923	-3.22795	-3.47667	-3.15	-3.91625	-3.90315	-2.69099	-3.7852	-1.60394	-3.92938	-3.36612	-3.62418	-2.89402	-1.99721	-3.60978	-3.34393	-2.51997	-3.162	0.048925
hsa-mir-766	-3.47921	-2.11126	-3.19373	-3.29501	-2.49646	-2.68076	-3.8096	-3.23722	-3.51526	-2.17547	-1.59826	-2.67505	-4.26324	-2.52911	-2.45673	-2.35784	-3.69486	-3.7321	-3.42688	-2.75766	-3.07485	-0.00265	-1.61006	0.39562	0.25402	-1.33552	-3.27905	-2.89748	-1.78543	-1.60094	-2.46721	-1.75055	-3.14193	-3.18035	-2.06477	-1.33179	-3.17328	-2.64031	-2.41105	-1.61359	-1.82076	-1.63867	-1.9469	-2.74538	-3.01228	-3.49615	-2.88668	-2.50895	0.125855
NA	2.14132	1.91258	1.40689	1.53316	0.60333	1.35417	1.94561	1.30195	1.09914	0.25355	0.15217	0.58313	-0.12548	0.4329	0.80089	1.31066	0.89072	0.65151	1.51086	1.51988	1.42551	1.25211	2.22883	1.08955	1.81797	1.36466	0.53178	0.9961	1.14645	0.88326	0.02459	0.09896	1.51671	0.69468	0.93143	0.27965	0.31511	0.64546	1.27803	1.19812	1.27068	-0.0327	1.12759	1.58587	0.96373	0.1466	1.84438	1.24713	0.164065
NA	-1.09901	-0.45249	-2.0402	-2.11919	-3.00172	-2.06646	-2.08142	-3.04109	-1.2953	-3.0705	-3.45364	-2.45949	-3.64093	-1.95977	-2.72477	-1.34885	-2.25643	-2.8314	-1.52697	-3.0366	-1.43596	-0.61694	-0.77059	-1.34908	-2.03774	-1.67893	-2.81897	-2.37368	-2.83852	-2.60742	-3.70796	-3.22795	-1.22437	-1.93947	-1.52817	-2.15273	-2.76946	-2.83395	-1.29846	-2.09367	-2.00687	-3.62244	-1.26524	-1.00516	-2.0834	-3.49615	-1.15866	-3.162	0.921487
hsa-mir-769	-3.94097	-3.41228	-3.64656	-3.61457	-3.39764	-3.45342	-4.11624	-3.68703	-4.28534	-3.0705	-3.45364	-3.52926	-4.41023	-3.43632	-3.63916	-3.09348	-3.86184	-4.30556	-3.69773	-3.20248	-4.08455	-2.50362	-3.12758	-1.37984	-3.20055	-2.26044	-3.39691	-3.97961	-3.67336	-2.60742	-3.20795	-3.22795	-3.4968	-3.60636	-3.91625	-3.86716	-4.02758	-3.7852	-3.31943	-3.92938	-3.36612	-3.62418	-2.89402	-2.16266	-3.93079	-3.49615	-3.68793	-3.162	0.237557
hsa-mir-769	-1.66208	-1.23166	-2.3618	-2.93419	-2.21762	-1.38984	-1.61457	-2.18786	-2.18522	-1.91615	-1.45176	-2.34533	-2.61956	-2.1031	-3.30664	-2.0568	-1.63854	-2.56064	-1.17001	-1.93822	-2.72301	-1.85057	-2.29471	-1.37984	-0.50982	-1.77273	-3.50813	-3.97961	-3.56586	-2.36323	-2.62678	-3.1808	-2.13895	-2.34822	-1.46999	-1.07163	-1.84945	-2.12779	-3.48493	-3.06761	-2.19864	-0.98243	-2.12375	-3.96246	-4.51081	-2.07368	-3.10347	-1.5743	0.128662
hsa-mir-770	-3.51704	-3.14569	-3.16034	-3.28189	-2.75052	-3.08926	-4.11624	-3.68703	-4.28534	-3.0705	-3.45364	-2.62061	-3.96707	-2.19266	-1.35559	-1.65224	-3.58771	-3.55867	-2.69837	-1.24115	-2.23913	-1.24394	-2.06952	-1.37984	-3.20055	-2.26044	-2.15933	-1.75472	-3.67336	-2.60742	-2.81464	-3.22795	-3.4968	-3.60636	-3.91625	-3.90315	-2.97748	-3.7852	-1.40141	-3.92938	-3.36612	-3.62418	-2.89402	-1.36111	-2.69422	-3.39778	-1.29873	-3.162	0.0189113
NA	-1.62217	-2.38762	-1.36776	-0.98785	-1.84038	-1.86883	-1.7949	-1.04035	-3.26451	-1.89951	-2.51281	-1.93014	-3.16076	-0.07699	-0.82932	-1.64902	-1.94436	-2.28781	-1.60584	-1.46555	-0.81237	2.90311	-0.29159	-0.82147	0.1993	0.58065	-1.85189	-1.27002	-2.63328	-1.26616	-1.49003	-2.62142	-1.93155	-1.09615	-2.6666	-3.45899	-1.5662	-2.65383	-0.02498	-2.33074	-1.91904	-2.85046	-1.03757	-1.67993	-2.83203	-1.83537	-1.69769	-1.779	0.340386
hsa-miR-873	-4.00187	-3.41228	-3.64656	-3.61457	-3.39764	-3.45342	-4.11624	-3.68703	-4.28534	-3.0705	-3.45364	-3.52926	-4.41023	-2.58551	-3.63916	-2.8999	-3.86184	-4.22546	-3.07721	-2.23643	-4.38761	-3.54526	-3.16745	-1.37984	-3.20055	-2.26044	-4.2572	-3.72102	-1.20733	-1.73293	-4.65498	-1.58558	-3.4968	-3.60636	-3.91625	-3.90315	-4.02758	-3.7852	-3.66053	-3.92938	-3.29199	-3.59211	-2.89402	-3.96246	-4.51288	-3.49615	-4.54925	-3.162	0.352164
hsa-miR-874	-2.72335	-2.47396	-1.02933	-1.03705	-1.44799	-1.91215	-2.42166	-2.30717	-3.38496	-1.70869	-3.10099	-2.33102	-3.14777	-0.25549	-1.1802	-1.23886	-1.89958	-2.2351	-1.9218	-1.30534	-1.9557	0.96246	-0.89476	-1.37984	-1.5293	-1.0275	0.72282	-1.20282	-2.40168	-2.50683	-0.60212	-3.22795	-1.92152	-1.44034	-2.37704	-3.59352	-1.28013	-2.32925	-0.54624	-2.6313	-2.25366	-3.62418	-2.31733	0.42782	-0.86312	-2.93819	-1.18922	-2.10545	0.186537
hsa-miR-876-5p	-4.00187	-3.41228	-3.64656	-3.61457	-3.39764	-3.45342	-4.11624	-3.68703	-4.28534	-3.0705	-3.45364	-3.52926	-4.41023	-3.80239	-3.63916	-3.09348	-3.86184	-4.30556	-3.41204	-2.98369	-4.38761	-3.54526	-3.16745	-1.37984	-3.20055	-2.26044	-4.2572	-3.89016	-3.49968	-2.60742	-4.65498	-3.22795	-3.4968	-3.60636	-3.91625	-3.90315	-4.02758	-3.7852	-3.66053	-3.92938	-3.36612	-3.62418	-2.89402	-3.96246	-4.51288	-3.49615	-4.54925	-3.162	0.795388
hsa-miR-877	-3.85074	-3.41228	-3.64656	-3.42194	-3.39764	-3.45342	-4.11624	-3.68703	-4.28534	-3.0705	-3.45364	-3.52926	-4.41023	-2.72414	-3.63916	-3.09348	-3.86184	-4.30556	-3.69773	-3.20248	-4.38761	-1.97494	-3.16745	-1.37984	-3.20055	-2.26044	-1.38581	-3.97961	-3.67336	-2.60742	-3.42247	-3.22795	-3.4968	-3.60636	-3.91625	-3.90315	-3.58212	-3.7852	-3.24436	-3.92938	-3.36612	-3.62418	-2.89402	-2.82765	-4.14411	-3.49615	-4.54925	-3.162	0.29234
hsa-miR-877	-3.85074	-3.41228	-3.64656	-3.42194	-3.39764	-3.45342	-4.11624	-3.68703	-4.28534	-3.0705	-3.45364	-3.52926	-4.41023	-2.72414	-3.63916	-3.09348	-3.86184	-4.30556	-3.69773	-3.20248	-4.38761	-1.97494	-3.16745	-1.37984	-3.20055	-2.26044	-1.38581	-3.97961	-3.67336	-2.60742	-3.42247	-3.22795	-3.4968	-3.60636	-3.91625	-3.90315	-3.58212	-3.7852	-3.24436	-3.92938	-3.36612	-3.62418	-2.89402	-2.82765	-4.14411	-3.49615	-4.54925	-3.162	0.29234
hsa-miR-877	-3.85074	-3.41228	-3.64656	-3.42194	-3.39764	-3.45342	-4.11624	-3.68703	-4.28534	-3.0705	-3.45364	-3.52926	-4.41023	-2.72414	-3.63916	-3.09348	-3.86184	-4.30556	-3.69773	-3.20248	-4.38761	-1.97494	-3.16745	-1.37984	-3.20055	-2.26044	-1.38581	-3.97961	-3.67336	-2.60742	-3.42247	-3.22795	-3.4968	-3.60636	-3.91625	-3.90315	-3.58212	-3.7852	-3.24436	-3.92938	-3.36612	-3.62418	-2.89402	-2.82765	-4.14411	-3.49615	-4.54925	-3.162	0.29234
hsa-miR-877	-3.85074	-3.41228	-3.64656	-3.42194	-3.39764	-3.45342	-4.11624	-3.68703	-4.28534	-3.0705	-3.45364	-3.52926	-4.41023	-2.72414	-3.63916	-3.09348	-3.86184	-4.30556	-3.69773	-3.20248	-4.38761	-1.97494	-3.16745	-1.37984	-3.20055	-2.26044	-1.38581	-3.97961	-3.67336	-2.60742	-3.42247	-3.22795	-3.4968	-3.60636	-3.91625	-3.90315	-3.58212	-3.7852	-3.24436	-3.92938	-3.36612	-3.62418	-2.89402	-2.82765	-4.14411	-3.49615	-4.54925	-3.162	0.29234
hsa-miR-877	-3.85074	-3.41228	-3.64656	-3.42194	-3.39764	-3.45342	-4.11624	-3.68703	-4.28534	-3.0705	-3.45364	-3.52926	-4.41023	-2.72414	-3.63916	-3.09348	-3.86184	-4.30556	-3.69773	-3.20248	-4.38761	-1.97494	-3.16745	-1.37984	-3.20055	-2.26044	-1.38581	-3.97961	-3.67336	-2.60742	-3.42247	-3.22795	-3.4968	-3.60636	-3.91625	-3.90315	-3.58212	-3.7852	-3.24436	-3.92938	-3.36612	-3.62418	-2.89402	-2.82765	-4.14411	-3.49615	-4.54925	-3.162	0.29234
hsa-miR-877	-3.85074	-3.41228	-3.64656	-3.42194	-3.39764	-3.45342	-4.11624	-3.68703	-4.28534	-3.0705	-3.45364	-3.52926	-4.41023	-2.72414	-3.63916	-3.09348	-3.86184	-4.30556	-3.69773	-3.20248	-4.38761	-1.97494	-3.16745	-1.37984	-3.20055	-2.26044	-1.38581	-3.97961	-3.67336	-2.60742	-3.42247	-3.22795	-3.4968	-3.60636	-3.91625	-3.90315	-3.58212	-3.7852	-3.24436	-3.92938	-3.36612	-3.62418	-2.89402	-2.82765	-4.14411	-3.49615	-4.54925	-3.162	0.29234
hsa-miR-877	-3.85074	-3.41228	-3.64656	-3.42194	-3.39764	-3.45342	-4.11624	-3.68703	-4.28534	-3.0705	-3.45364	-3.52926	-4.41023	-2.72414	-3.63916	-3.09348	-3.86184	-4.30556	-3.69773	-3.20248	-4.38761	-1.97494	-3.16745	-1.37984	-3.20055	-2.26044	-1.38581	-3.97961	-3.67336	-2.60742	-3.42247	-3.22795	-3.4968	-3.60636	-3.91625	-3.90315	-3.58212	-3.7852	-3.24436	-3.92938	-3.36612	-3.62418	-2.89402	-2.82765	-4.14411	-3.49615	-4.54925	-3.162	0.29234
hsa-miR-886-3p	-4.00187	-3.41228	0.70096	2.09126	4.08245	6.68784	3.94921	2.26352	-4.28534	5.90123	-3.45364	4.17641	-4.41023	-3.80239	-3.63916	4.89311	3.99564	3.08835	4.67881	3.32246	4.18404	0.07014	-3.16745	6.74878	-3.03813	6.95807	-4.2572	-0.20035	2.80054	5.11698	4.8827	-0.29827	-3.4968	5.65376	-3.91625	-3.90315	-4.02758	6.48744	-3.66053	-3.92938	-3.36612	5.22319	5.38781	6.63038	4.37185	6.40406	4.27667	5.28176	0.709316
hsa-miR-886-3p	-4.00187	-3.41228	-3.64656	-3.61457	-3.39764	-3.33332	-4.11624	-3.68703	-4.28534	-3.0705	-3.45364	-3.52926	-4.41023	-3.80239	-3.63916	-3.09348	-3.86184	-4.30556	-3.69773	-3.20248	-4.38761	-3.54526	-3.16745	-1.37984	-3.20055	-2.26044	-4.2572	-3.97961	-3.67336	-2.60742	-3.51921	-3.22795	-3.4968	-3.60636	-3.91625	-3.90315	-4.02758	-3.63554	-3.66053	-3.92938	-3.36612	-3.62418	-2.89402	-3.71641	-4.51288	-3.49615	-4.54925	-3.162	0.749331
hsa-miR-887	-4.00187	-3.41228	-3.64656	-3.61457	-3.39764	-3.45342	-4.11624	-3.68703	-4.28534	-3.0705	-3.45364	-3.52926	-3.49254	-2.75307	-2.93642	-3.09348	-3.86184	-4.23307	-3.69773	-3.20248	-4.38761	-1.87241	-3.16745	-1.37984	-3.20055	-2.26044	-3.28786	-3.97961	-3.67336	-2.60742	-3.56133	-3.22795	-3.4968	-3.60636	-3.91625	-3.77875	-4.02758	-3.7852	-3.59198	-3.92938	-3.36612	-3.62418	-2.89402	-3.70255	-4.51288	-3.49615	-4.52114	-3.162	0.297146
hsa-miR-892b	-1.66578	-1.47452	-1.68263	-1.66689	-0.06416	-0.16894	-2.53273	-2.37922	-2.9785	-1.17499	-1.34872	-1.41076	-2.06799	0.00626	-0.43375	0.56649	-1.85695	-2.37882	-1.46026	0.17464	-0.30138	0.42361	0.7996	-1.09667	-1.4177	-1.32632	0.62684	0.53434	-2.60948	-2.15911	0.51149	-2.68565	-1.9427	-1.83516	-2.62565	-2.90291	0.47448	-2.39305	0.22835	-2.20372	-1.7851	-1.69152	-1.37094	0.84023	0.35813	-2.17797	0.33092	-1.36863	0.18192
hsa-mir-9-1	-2.54817	-3.41228	-3.64656	-0.45856	-0.25045	-3.45342	-4.11624	-3.68703	1.77267	-3.0705	-3.45364	-3.52926	-4.41023	-3.80239	0.23999	3.92115	-3.86184	-1.27807	5.23797	3.618	0.96318	0.18962	0.00466	-1.37984	-3.20055	-2.05409	-3.24352	0.28969	-0.45735	-1.67098	-1.88018	-1.42889	-3.27232	-3.60636	-1.08985	-1.04728	-2.31424	-3.7852	0.08188	-1.7948	0.71254	-2.77796	-2.89402	-3.96246	-3.78775	-3.49615	-3.48931	-3.162	0.280948
hsa-mir-9-2	-2.54817	-3.41228	-3.64656	-0.45856	-0.25045	-3.45342	-4.11624	-3.68703	1.77267	-3.0705	-3.45364	-3.52926	-4.41023	-3.80239	0.23999	3.92115	-3.86184	-1.27807	5.23797	3.618	0.96318	0.18962	0.00466	-1.37984	-3.20055	-2.05409	-3.24352	0.28969	-0.45735	-1.67098	-1.88018	-1.42889	-3.27232	-3.60636	-1.08985	-1.04728	-2.31424	-3.7852	0.08188	-1.7948	0.71254	-2.77796	-2.89402	-3.96246	-3.78775	-3.49615	-3.48931	-3.162	0.280948
hsa-mir-9-3	-2.54817	-3.41228	-3.64656	-0.45856	-0.25045	-3.45342	-4.11624	-3.68703	1.77267	-3.0705	-3.45364	-3.52926	-4.41023	-3.80239	0.23999	3.92115	-3.86184	-1.27807	5.23797	3.618	0.96318	0.18962	0.00466	-1.37984	-3.20055	-2.05409	-3.24352	0.28969	-0.45735	-1.67098	-1.88018	-1.42889	-3.27232	-3.60636	-1.08985	-1.04728	-2.31424	-3.7852	0.08188	-1.7948	0.71254	-2.77796	-2.89402	-3.96246	-3.78775	-3.49615	-3.48931	-3.162	0.280948
hsa-mir-9-1	-3.08247	-3.41228	-3.64656	0.07389	-0.60696	-3.45342	-4.11624	-3.68703	2.92966	-3.0705	-3.45364	-3.52926	-4.41023	-3.80239	-1.03185	2.88057	-3.86184	-1.94241	4.44468	2.4091	0.00448	-1.14662	-2.2243	-1.37984	-2.94608	-0.95973	-4.2572	-1.01051	0.1112	-0.83028	-3.02477	-0.25918	-3.16441	-3.60636	-1.26883	-1.23354	-4.02758	-3.7852	-0.98454	-0.07825	0.99084	-2.51152	-2.89402	-3.96246	-4.51288	-3.49615	-4.54925	-3.162	0.545872
hsa-mir-9-2	-3.08247	-3.41228	-3.64656	0.07389	-0.60696	-3.45342	-4.11624	-3.68703	2.92966	-3.0705	-3.45364	-3.52926	-4.41023	-3.80239	-1.03185	2.88057	-3.86184	-1.94241	4.44468	2.4091	0.00448	-1.14662	-2.2243	-1.37984	-2.94608	-0.95973	-4.2572	-1.01051	0.1112	-0.83028	-3.02477	-0.25918	-3.16441	-3.60636	-1.26883	-1.23354	-4.02758	-3.7852	-0.98454	-0.07825	0.99084	-2.51152	-2.89402	-3.96246	-4.51288	-3.49615	-4.54925	-3.162	0.545872
hsa-mir-9-3	-3.08247	-3.41228	-3.64656	0.07389	-0.60696	-3.45342	-4.11624	-3.68703	2.92966	-3.0705	-3.45364	-3.52926	-4.41023	-3.80239	-1.03185	2.88057	-3.86184	-1.94241	4.44468	2.4091	0.00448	-1.14662	-2.2243	-1.37984	-2.94608	-0.95973	-4.2572	-1.01051	0.1112	-0.83028	-3.02477	-0.25918	-3.16441	-3.60636	-1.26883	-1.23354	-4.02758	-3.7852	-0.98454	-0.07825	0.99084	-2.51152	-2.89402	-3.96246	-4.51288	-3.49615	-4.54925	-3.162	0.545872
NA	6.58869	6.61303	6.96212	8.04244	7.02274	6.78274	5.80111	7.62896	5.4224	6.57695	6.75867	6.47394	6.32608	7.78267	7.48319	6.98709	7.64052	6.7809	6.98002	7.18739	7.07693	9.28866	8.34593	8.25265	6.7338	9.09975	7.59013	7.47704	6.71904	7.41968	7.5635	6.70734	7.43689	7.53401	6.39384	5.89331	6.46203	5.52086	7.52752	5.27681	6.06964	6.45125	10.2472	7.01109	6.32706	6.7344	7.14078	6.75111	0.213781
hsa-mir-92-1	2.59131	2.73693	4.68283	4.53098	2.69036	3.74742	3.37581	4.30637	3.40701	3.5117	3.10346	3.16974	1.78992	2.98284	1.90643	2.63113	2.79977	2.03846	2.5974	2.15145	4.1404	4.80656	5.1843	6.91285	5.95849	5.0764	3.60511	3.00656	2.31451	1.95834	2.09519	3.34954	3.66601	3.56105	2.39479	3.96161	2.74306	3.43859	3.60279	3.52702	4.34979	1.90703	2.28347	2.50924	2.23702	2.96404	1.95104	3.63657	0.446963
hsa-mir-92-2	2.59131	2.73693	4.68283	4.53098	2.69036	3.74742	3.37581	4.30637	3.40701	3.5117	3.10346	3.16974	1.78992	2.98284	1.90643	2.63113	2.79977	2.03846	2.5974	2.15145	4.1404	4.80656	5.1843	6.91285	5.95849	5.0764	3.60511	3.00656	2.31451	1.95834	2.09519	3.34954	3.66601	3.56105	2.39479	3.96161	2.74306	3.43859	3.60279	3.52702	4.34979	1.90703	2.28347	2.50924	2.23702	2.96404	1.95104	3.63657	0.446963
hsa-mir-92-1	-4.00187	-3.41228	-3.59974	-3.43267	-3.39764	-3.45342	-4.11624	-3.57692	-4.28534	-3.0705	-3.45364	-3.52926	-4.41023	-3.80239	-3.63916	-3.09348	-3.86184	-4.30556	-3.69773	-3.20248	-4.11933	-2.93196	-2.96015	1.73058	-0.87345	-1.97294	-4.13684	-3.97961	-3.67336	-2.60742	-4.65498	-3.22795	-3.4968	-3.51986	-3.91625	-3.90315	-4.02758	-3.78065	-3.66053	-3.92938	-3.06153	-3.62418	-2.89402	-3.96246	-4.51288	-3.49615	-4.54925	-3.162	0.567831
hsa-mir-92b	-3.81586	-3.40673	-3.64656	-3.61457	-3.39764	-3.45342	-4.11624	-3.68703	-4.28534	-3.0705	-3.45364	-3.52926	-4.41023	-3.25896	-3.63916	-3.09348	-3.86184	-4.30556	-1.94776	-3.20248	-4.38761	-3.54526	-3.16745	-1.37984	-3.20055	-2.26044	-4.2572	-3.97961	-3.67336	-2.60742	-4.65498	-3.22795	-3.4968	-3.60636	-3.91625	-2.85923	-4.02758	-3.7852	-3.66053	-3.92938	-3.36612	-3.62418	-2.89402	-3.96246	-3.99664	-3.49615	-4.22355	-3.162	0.554
hsa-mir-93	4.99872	3.47236	3.54283	3.36116	3.16697	3.49788	3.57657	3.62674	2.14153	3.17252	3.7364	3.72124	2.30471	2.82676	3.08022	2.64777	1.93827	1.80199	3.31688	2.52645	3.97715	3.97629	4.41275	3.93435	5.70505	4.11728	2.20848	3.1332	3.29218	2.45488	2.23717	3.41691	2.8911	3.03906	3.93117	3.64507	3.18338	2.7313	2.34267	1.5408	3.52862	2.81546	3.42167	2.11139	1.80632	2.86393	1.71611	3.46036	0.121462
hsa-mir-93	-2.97388	-3.41228	-3.64656	-3.5999	-3.39764	-3.42679	-3.74997	-3.60858	-4.28534	-3.0705	-3.34406	-3.52926	-4.41023	-3.80239	-3.63916	-3.09348	-3.86184	-4.30556	-3.40509	-3.20248	-2.98422	-3.06752	-2.58008	-1.37984	-1.6327	-2.26044	-4.2572	-3.58292	-3.67336	-2.60742	-4.65498	-3.22795	-3.4968	-3.60636	-3.91625	-3.49428	-3.96021	-3.7852	-3.66053	-3.92938	-3.36612	-3.62418	-2.89402	-3.96246	-4.51288	-3.49615	-4.54925	-3.162	0.908422
hsa-miR-933	-4.00187	-3.41228	-3.64656	-3.61457	-3.39764	-3.45342	-4.11624	-3.68703	-4.28534	-3.0705	-3.45364	-3.52926	-4.41023	-3.80239	-3.63916	-3.09348	-3.86184	-4.30556	-3.69773	-3.20248	-4.38761	-3.38303	-3.16745	-1.37984	-3.20055	-2.26044	-4.03135	-3.8571	-3.67336	-2.60742	-4.37943	-3.22795	-3.4968	-3.60636	-3.91625	-3.90315	-3.9839	-3.7852	-3.66053	-3.92938	-3.36612	-3.62418	-2.89402	-3.408	-4.29316	-3.49615	-4.27391	-3.162	0.668303
hsa-miR-939	-0.86683	-0.46941	-0.25799	0.34343	-0.07081	0.08768	-0.82206	-0.09711	-2.32989	0.71012	1.03736	0.51902	-1.06404	0.68855	1.09727	1.0223	-0.57928	-0.49248	0.42241	1.11596	0.53677	1.69597	1.11496	2.22855	0.25558	2.08721	0.7466	1.08722	0.58872	0.35944	0.05696	1.1109	-0.86119	0.08504	-1.25968	-0.03608	-0.11567	0.81725	1.04403	0.58972	1.16307	0.81741	1.44062	1.27493	-0.36009	1.00929	0.63301	1.45401	0.00467528
hsa-miR-940	-1.07978	-0.88906	-0.65322	0.9056	-0.23073	-0.62995	-1.66177	-0.53535	-1.69004	-0.79333	-1.10598	-0.28486	-1.36706	0.58016	-0.3086	-0.41352	-0.64866	-1.31811	-0.65153	-0.2391	-1.35082	1.51458	-0.01484	0.86306	-0.07447	0.68147	0.73193	-0.76976	-0.95387	0.0035	-0.56939	-0.772	-1.04759	-0.66572	-0.79134	-1.37738	-0.87158	-2.08758	-0.01912	-1.26298	-1.13079	-1.48867	-0.62909	0.44688	-0.85504	-0.87251	-1.23559	-0.55903	0.389298
hsa-mir-95	-2.01433	-3.41228	-3.64656	-2.06641	-3.27792	-3.45342	-4.11624	-3.68703	-3.12108	-3.01287	-2.57546	-3.52926	-4.41023	-3.80239	-3.63916	-3.09348	-3.86184	-4.30556	-3.69773	-3.20248	-2.47064	-3.54526	-3.16745	-1.37984	-3.20055	-2.26044	-4.2572	-3.97961	-3.67336	-2.60742	-4.65498	-3.22795	-3.4968	-3.60636	-3.75279	-3.85764	-4.02758	-3.7852	-3.58939	-3.34858	-3.36612	-3.62418	-2.89402	-3.96246	-4.51288	-3.49615	-4.54925	-3.162	0.0748139
hsa-mir-96	2.92054	2.15979	1.33821	1.76969	1.98172	2.06688	2.25982	1.88024	1.7087	1.44761	3.32725	1.84283	0.7715	0.5076	-0.46646	1.29751	-0.90997	0.75389	2.16385	2.483	2.50609	-3.37712	-3.16745	2.42527	2.92647	1.69696	-0.82067	-0.89543	-3.01898	0.20814	-1.30201	1.73902	1.39659	2.15036	3.58584	3.67739	1.36372	1.06763	1.49547	2.45818	4.11741	2.51581	3.03488	1.23262	0.04593	1.51957	-0.10401	3.03066	0.0891628
hsa-mir-98	1.95445	-2.14055	0.90384	0.21776	0.70881	0.95507	1.49019	1.03493	2.30256	0.393	1.34474	2.16603	0.46665	0.35068	1.11713	0.34341	0.27522	0.85944	1.32658	0.84992	0.5816	0.0732	1.85066	-1.37984	2.16346	2.15472	-2.02197	1.04657	0.74687	-0.62869	-0.09772	1.24245	2.33979	-0.41534	2.14577	2.71633	-0.35587	0.94258	0.29452	1.16893	2.12962	1.2267	-0.96465	-0.29142	0.66115	1.28891	0.91822	0.61194	0.834876
hsa-mir-99a	0.54768	0.91631	-3.64656	-3.61457	0.22734	-3.45342	-4.11624	-3.68703	-4.27894	4.73354	2.21574	2.41564	0.6833	1.36513	1.35899	3.09156	2.50935	2.73916	4.07382	2.74961	-2.99706	-3.54526	-3.16745	-1.37984	-3.20055	-2.26044	2.95308	-0.64667	2.2986	0.92022	1.64958	0.91879	1.46625	1.02515	0.80739	4.53893	-4.02758	-3.7852	-1.05049	1.37764	1.75484	-2.40132	3.00704	-3.96246	1.98466	-3.49615	1.26757	0.06617	0.090548
hsa-mir-99b	2.15082	2.08811	-3.64656	-0.84989	0.84405	1.37553	1.62547	-1.72309	1.99668	2.74702	2.53109	1.57365	1.1019	1.26372	0.42483	0.66485	1.76784	1.19792	2.12359	1.17029	-0.35287	-3.54526	-3.16745	0.4958	-3.20055	-2.26044	-4.2572	0.11909	-0.17866	-0.11673	0.29801	-0.29753	2.06164	0.97345	2.86642	0.75828	0.95663	1.15233	0.30195	0.69853	1.91155	1.77958	1.53543	-0.3539	0.17768	2.07948	0.23228	1.31887	0.438182
[truncated: 5 more columns]

[truncated: 2 more sheets: Blower et al. analysis, Sokilde et al. analysis]
